# Supplementary material
Source: PubMed Central journal article supplement (PMC7812666)
Supplement: ml0c00556_si_001.pdf [file ml0c00556_si_001.pdf]

# Supporting Information for

## **Solution Conformations Shed Light on PROTAC Cell Permeability**

Yoseph Atilaw,<sup>a</sup> Vasanthanathan Poongavanam,<sup>a</sup> Caroline Svensson Nilsson,<sup>a</sup> Duy Nguyen,<sup>b</sup> Anja Giese,<sup>c</sup> Daniel Meibom,<sup>d</sup> Mate Erdelyi<sup>a</sup> and Jan Kihlberg<sup>a,\*</sup>

<sup>a</sup>Department of Chemistry - BMC, Uppsala University, SE-75123 Uppsala, Sweden

<sup>b</sup>Nuvisan Innovation Campus Berlin GmbH, Muellerstrasse 178, 13353 Berlin, Germany

<sup>c</sup>Bayer AG, Drug Discovery Sciences, 13342 Berlin, Germany

<sup>d</sup>Bayer AG, Drug Discovery Sciences, 42113 Wuppertal, Germany

### **Corresponding author**

Jan Kihlberg, [jan.kihlberg@kemi.uu.se](mailto:jan.kihlberg@kemi.uu.se), ORCID: 0000-0002-4205-6040

## Table of Contents

|                                                                                                                                                                                                                                                    |    |
|----------------------------------------------------------------------------------------------------------------------------------------------------------------------------------------------------------------------------------------------------|----|
| 1. Synthesis and characterization of PROTAC <b>1</b> .....                                                                                                                                                                                         | 3  |
| 1.1. Analytical LCMS methods.....                                                                                                                                                                                                                  | 3  |
| 1.2. [(4-{1-[4-(Trifluoromethoxy)benzoyl]piperidin-4-yl}pyrido[3,2-d]pyrimidin-7-yl)oxy]acetic acid ( <b>3</b> ).....                                                                                                                              | 3  |
| 1.3. 3-Methyl-N-{2-(2-{2-[(4-{1-[4-(trifluoromethoxy)benzoyl]piperidin-4-yl}pyrido[3,2-d]pyrimidin-7-yl)oxy]acetamido}ethoxy)ethoxy]acetyl}-L-valyl-(4R)-4-hydroxy-N-{[4-(4-methyl-1,3-thiazol-5-yl)phenyl]methyl}-L-prolinamide ( <b>1</b> )..... | 4  |
| 2. Determination of physicochemical properties and <i>in vitro</i> potencies of PROTAC <b>1</b> .....                                                                                                                                              | 6  |
| 3. NMR spectroscopic analysis of PROTAC <b>1</b> .....                                                                                                                                                                                             | 7  |
| 3.1. <sup>1</sup> H-NMR chemical shift assignment.....                                                                                                                                                                                             | 7  |
| 3.2. Interproton distances.....                                                                                                                                                                                                                    | 9  |
| 4. Monte Carlo molecular mechanics (MCMM) conformational search.....                                                                                                                                                                               | 11 |
| 5. Identifications of solution ensemble using the NAMFIS algorithm.....                                                                                                                                                                            | 12 |
| 6. Computational characterization of reported VHL PROTACs and of PROTAC <b>1</b> .....                                                                                                                                                             | 17 |
| 6.1. Molecular property analysis.....                                                                                                                                                                                                              | 17 |
| 6.2. Calculation of descriptors for conformers in the solution ensembles.....                                                                                                                                                                      | 19 |
| 6.3. Structural comparison of conformers in solution ensembles.....                                                                                                                                                                                | 22 |
| 7. Coordinates for the conformations (1-24).....                                                                                                                                                                                                   | 23 |
| 8. NMR Spectra of PROTAC <b>1</b> .....                                                                                                                                                                                                            | 87 |
| 9. References.....                                                                                                                                                                                                                                 | 96 |

## 1. Synthesis and characterization of PROTAC 1

### 1.1. Analytical LCMS methods

**Method 1:** Instrument: Waters Acquity UPLCMS Single Quad; column: Acquity UPLC BEH C18 1.7  $\mu\text{m}$ , 50x2.1 mm; Eluent A: water + 0.1% formic acid (99%), Eluent B: acetonitrile; gradient: 0-1.6 min 1-99% B, 1.6-2.0 min 99% B; flow 0.8 ml/min; temperature: 60  $^{\circ}\text{C}$ ; DAD scan: 210-400 nm.

**Method 2:** Instrument: Agilent 1290 UPLCMS 6230 TOF; column: BEH C 18 1.7  $\mu\text{m}$ , 50x2.1 mm; Eluent A: water + 0.05% formic acid (99%); Eluent B: acetonitrile + 0.05% formic acid (99%); gradient: 0-1.7 2-90% B, 1.7-2.0 90% B; flow 1.2 ml/min; temperature: 60 $^{\circ}\text{C}$ ; DAD scan: 190-400 nm.

### 1.2. [(4-{1-[4-(Trifluoromethoxy)benzoyl]piperidin-4-yl}pyrido[3,2-d]pyrimidin-7-yl)oxy]acetic acid (3)

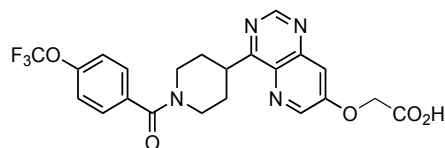

Potassium carbonate (396 mg, 2.87 mmol) and ethyl bromoacetate (0.19 mL, 1.70 mmol) were added to a solution of [4-(7-hydroxypyrido[3,2-d]pyrimidin-4-yl)piperidin-1-yl][4-(trifluoro-methoxy)phenyl]methanone<sup>1</sup> (**2**, 600 mg, 1.64 mmol) in THF (18 mL). The reaction mixture was stirred at 100  $^{\circ}\text{C}$  for 8 h in a sealed tube. After cooling to room temperature, water was added, and the resulting mixture was extracted with ethyl acetate. The combined organic layers were washed with water, brine, dried over anhydrous sodium sulfate, and concentrated in vacuo. The crude product was used in the next step without prior purification (809 mg).

Aqueous sodium hydroxide (14 mL, 2.0 M, 28 mmol) was added to a solution of ethyl [(4-{1-[4-(trifluoromethoxy)benzoyl]piperidin-4-yl}pyrido[3,2-d]pyrimidin-7-yl)oxy]acetate (809 mg) in ethanol (42 mL). The reaction mixture was stirred at room temperature overnight. After removal of ethanol, water was added, followed by extraction with dichloromethane. The aqueous phase was acidified with saturated aqueous citric acid

solution. The precipitates were then filtered and dried in vacuum to afford **3** (304 mg, 38% yields over 2 steps).

LC-MS (method 1): RT = 1.01 min; MS (ESI pos) m/z calcd for C<sub>22</sub>H<sub>20</sub>N<sub>4</sub>O<sub>5</sub>F<sub>3</sub> [M+H]<sup>+</sup> 477, found 477.

<sup>1</sup>H-NMR (400 MHz, DMSO-*d*<sub>6</sub>): δ [ppm] 13.50-13.10 (br, 1H, -COOH), 9.21 (s, 1H, pyrimidine -H), 8.90 (d, *J* = 2.79 Hz, 1H, pyridine-H), 7.73 (d, *J* = 3.00 Hz, 1H, pyridine-H), 7.61-7.56 (AA'BB' system, 2H, Phenyl-H), 7.49-7.41 (AA'BB' system, 2H, Phenyl-H), 5.07 (s, 2H, -CH<sub>2</sub>), 4.70-4.60 (br, 1H, piperidine-H), 4.45-4.35 (br, 1H, piperidine-H), 3.75-3.65 (br, 1H, piperidine-H), 3.14-2.99 (br, 1H, piperidine-H), 2.09-1.80 (br m, 4H, piperidine-H). One piperidine proton is not visible.

### 1.3. 3-Methyl-N- $\{2-(2-\{2-[(4-\{1-[4-(\text{trifluoromethoxy})\text{benzoyl}]piperidin-4-yl\}pyrido[3,2-d]pyrimidin-7-yl\}oxy)acetamido\}ethoxy)ethoxy\}acetyl\}$ -L-valyl-(4R)-4-hydroxy-N- $\{4-(4\text{-methyl-1,3-thiazol-5-yl})phenyl\}methyl\}$ -L-prolinamide (**1**)

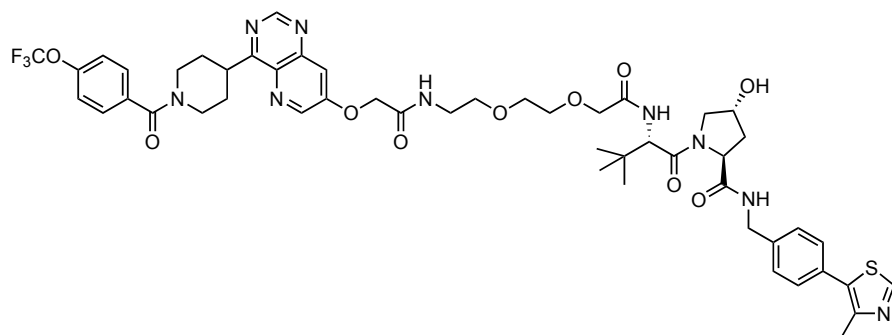

N- $\{2-(2\text{-Aminoethoxy})ethoxy\}acetyl\}$ -3-methyl-L-valyl-(4R)-4-hydroxy-N- $\{4-(4\text{-methyl-1,3-thiazol-5-yl})phenyl\}methyl\}$ -L-prolinamide<sup>2</sup> (**4**, 133 mg, 0,23 mmol), followed by HATU (88 mg, 0.23 mmol) and N,N-diisopropylethylamine (0.11 mL, 0.63 mmol) were added to a solution of  $[(4-\{1-[4-(\text{trifluoromethoxy})\text{benzoyl}]piperidin-4-yl\}pyrido[3,2-d]pyrimidin-7-yl\}oxy)acetic\ acid$  (**3**, 100 mg, 0.21 mmol) in DMF (3 mL). The reaction mixture was stirred at room temperature overnight and purified by HPLC (Instrument: Waters auto purification MS Single Quad; column: Waters X Brigade C18 5 μm 100 x 30 mm; Eluent A: water + 0.1% formic acid (99%), Eluent B: acetonitrile; gradient: 0-5.5 min 5-100% B; flow 70 ml/min; temp: 25 °C; DAD scan: 210-400 nm) to afford PROTAC **1** (112 mg, 48% yield).

HRMS (ESI) m/z calcd for C<sub>50</sub>H<sub>59</sub>N<sub>9</sub>O<sub>10</sub>F<sub>3</sub>S [M+H]<sup>+</sup> 1034.4058, found 1034.4078.

<sup>1</sup>H-NMR (400 MHz, DMSO-*d*<sub>6</sub>): δ [ppm] 9.20 (s, 1H, pyrimidine H), 8.97 (s, 1H, thiazole-H), 8.89 (d, *J* = 2.79 Hz, 1H, pyridine-H), 8.59 (t, *J* = 5.96 Hz, 1H, amide-NH), 8.36 (t, *J* = 5.45 Hz, 1H, amide-NH), 7.66 (d, *J* = 2.79 Hz, 1H, pyridine-H), 7.60-7.55 (AA'BB' system, 2H, Phenyl-H), 7.47-7.49 (m, 3H, 2 Phenyl-H, amide-NH), 7.39-7.35 (m, 4H, Phenyl-H), 5.16 (d, *J* = 3.65 Hz, 1H, OH), 4.83 (s, 2H, -CH<sub>2</sub>), 4.65-4.20 (m, 8H), 3.95 (s, 2H, -CH<sub>2</sub>), 3.75-3.45 (m, 11H), 2.45-2.40 (m, 4H), 2.10-1.77 (m, 6H), 0.93 (s, 9H, *t*-Bu).

<sup>13</sup>C-NMR (101 MHz, CDCl<sub>3</sub>): δ [ppm] 173.8, 171.1, 170.8, 169.7, 169.1, 166.7, 156.4, 155.9, 150.3, 150.0, 148.5, 147.4, 145.4, 138.1, 134.7, 133.9, 131.5, 131.0, 129.4, 128.8, 128.2, 120.9, 113.6, 71.3, 70.3, 70.1, 70.0, 69.5, 67.5, 58.9, 57.2, 56.8, 43.1, 38.8, 37.7, 36.6, 35.9, 30.7, 30.6, 29.7, 26.4, 16.1.

LC-MS determination of purity (method 2): RT = 1.12 min; MS (ESI pos) *m/z* calcd for C<sub>50</sub>H<sub>59</sub>N<sub>9</sub>O<sub>10</sub>F<sub>3</sub>S [M+H]<sup>+</sup> 1034, found 1034, purity 93.6%.

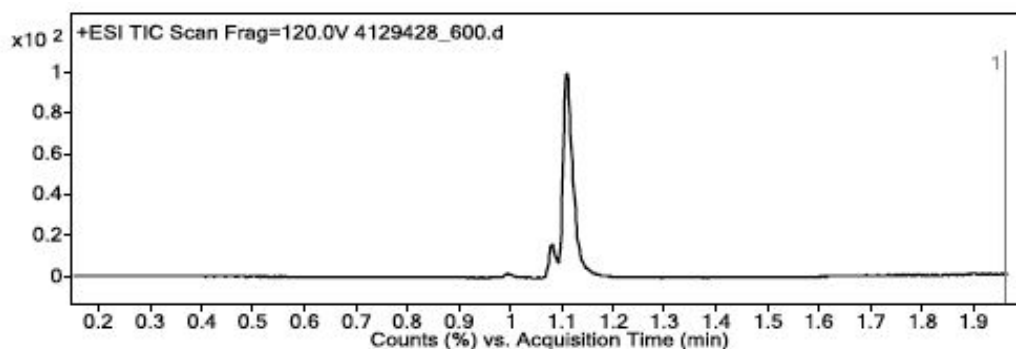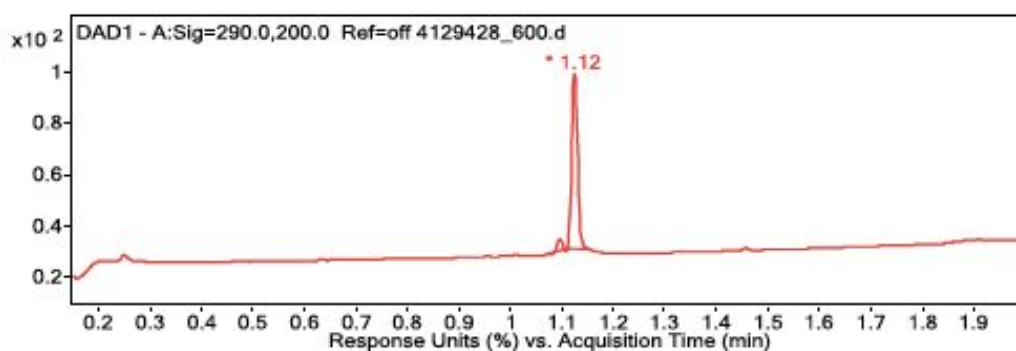

Integration Peak List

| Peak | RT   | Height | Area  | AreaSumPercent |
|------|------|--------|-------|----------------|
| 1    | 1.09 | 3.88   | 2.79  | 6.38           |
| 2    | 1.12 | 51.4   | 40.97 | 93.62          |

## 2. Determination of physicochemical properties and *in vitro* potencies of PROTAC 1

**Determination of aqueous solubility and LogD.** The aqueous solubility and LogD of **1** were determined as reported previously.<sup>1</sup>

**Determination of permeability using the PAMPA assay.** The permeability of **1** in the parallel artificial membrane permeability assay (PAMPA) was determined at Pharmaron: <https://www.pharmaron.com/services/biosciences/dmpk-for-discovery-preclinical-development/in-vitro-admet>

**Biochemical ERK5 inhibition assay.** The potency (IC<sub>50</sub>) of **1** in inhibition of ERK5 in a biochemical assay was determined as reported previously.<sup>1</sup>

**Biochemical VHL inhibition assay.** Von Hippel Lindau (VHL) protein, Elongin B and Elongin C protein (VBC) were labeled with an amine reactive (isothiocyanate group) terbium chelate. A HIF-1 $\alpha$  derived peptide with hydroxyproline was labeled with fluorescein on the C terminus. The hydroxyproline is essential for the binding of the peptide to the VBC complex, leading to an energy transfer from terbium to fluorescein and the generation of FRET signals (ex 340 nm, em 520 nm). The decrease in the FRET signal is proportional to the binding of a compound to VHL. IC<sub>50</sub> values are determined by interpolation from plots of relative FRET signal vs inhibitor concentration.

**Cellular VHL inhibition assay.** Cellular VHL inhibition was determined using the Promega NanoBRET™ VHL ternary complex starter kit: <https://promega.media/-/media/files/resources/application-notes/nanobret/assessing-protac-permeability-and-quantifying-vhl-engagement.pdf?la=en>.

**Table S1.** Potencies for binding of **1** to ERK5 and VHL determined in biochemical and cell-based assays, followed by the ratio between the two potencies.

| Potency | Biochemical IC <sub>50</sub> ( $\mu$ M) | Cellular IC <sub>50</sub> ( $\mu$ M) | Cell/Biochem. ratio |
|---------|-----------------------------------------|--------------------------------------|---------------------|
| ERK5    | 1.23 $\pm$ 0.044 (N=2)                  |                                      |                     |
| VHL     | 0.307 $\pm$ 0.009 (N=3)                 | 4.31 $\pm$ 6.11 (N=5) <sup>a</sup>   | 14                  |

<sup>a</sup>Geometric mean

### 3. NMR spectroscopic analysis of PROTAC 1

#### 3.1. <sup>1</sup>H-NMR chemical shift assignment

Assignment of protons for PROTAC 1 was derived from <sup>1</sup>H, TOCSY, NOESY, HSQC and HMBC NMR spectra (Figure S4-S20), recorded at 25 °C on a 800 MHz BRUKER Avance III HD NMR spectrometer equipped with a TCI cryogenic probe using CDCl<sub>3</sub>, DMSO-*d*<sub>6</sub> or DMSO-*d*<sub>6</sub>:D<sub>2</sub>O (10:1) as solvent. <sup>1</sup>H NMR chemical shifts are listed in Table S2.

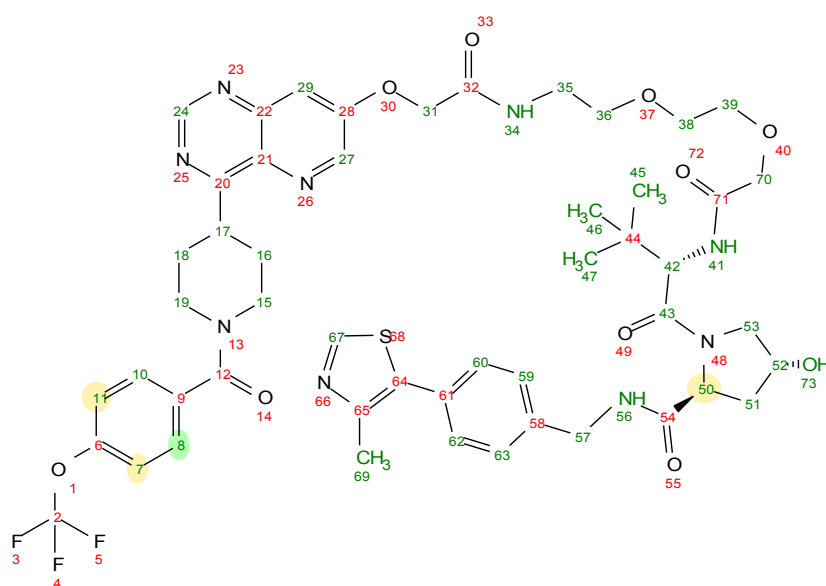

**Figure S1.** Structure and numbering of PROTAC 1

**Table S2.** <sup>1</sup>H-NMR chemical shift assignment (δ, ppm) for PROTAC **1** in CDCl<sub>3</sub>, DMSO-*d*<sub>6</sub> and DMSO-*d*<sub>6</sub>:D<sub>2</sub>O (10:1)

| Proton no. | δ, CDCl <sub>3</sub> | Proton no. | δ, DMSO- <i>d</i> <sub>6</sub> | Proton no. | δ, DMSO- <i>d</i> <sub>6</sub> :D <sub>2</sub> O (10:1) |
|------------|----------------------|------------|--------------------------------|------------|---------------------------------------------------------|
| 7/11       | 7.27                 | 7/11       | 7.45                           | 7/11       | 7.42                                                    |
| 8/10       | 7.52                 | 8/10       | 7.58                           | 8/10       | 7.55                                                    |
| 17         | 4.38                 | 16`/18`    | 4.64                           | 16`/18`    | 1.83                                                    |
| 24         | 9.18                 | 16``/18``  | 3.68                           | 16``/18``  | 1.83                                                    |
| 27         | 8.80                 | 17         | 4.38                           | 17         | 4.34                                                    |
| 29         | 7.62                 | 24         | 9.20                           | 24         | 9.16                                                    |
| 31`        | 4.79                 | 27         | 8.89                           | 27         | 8.85                                                    |
| 31``       | 4.68                 | 29         | 7.65                           | 29         | 7.60                                                    |
| 34         | 7.31                 | 31`/31``   | 4.82                           | 31`/31``   | 4.78                                                    |
| 35`/35``   | 3.51                 | 34         | 8.34                           | 34         | 8.38                                                    |
| 36`/36``   | 3.60                 | 35`        | 3.49                           | 35`        | 3.34                                                    |
| 38`/38``   | 3.60                 | 35``       | 3.35                           | 35``       | 3.29                                                    |
| 39``/39``  | 3.60                 | 36`/36``   | 3.60                           | 36`/36``   | 3.47                                                    |
| 41         | 7.35                 | 38`/38``   | 3.60                           | 38`/38``   | 3.36                                                    |
| 42         | 4.59                 | 39`/39``   | 3.60                           | 39`/39``   | 3.52                                                    |
| 50         | 4.71                 | 41         | 7.42                           | 41         | 7.39                                                    |
| 51`        | 2.45                 | 42         | 4.57                           | 42         | 4.54                                                    |
| 51``       | 2.22                 | 50         | 4.44                           | 50         | 4.43                                                    |
| 52         | 4.59                 | 51`        | 2.05                           | 51`        | 1.89                                                    |
| 53`        | 4.06                 | 51``       | 1.89                           | 51``       | 2.05                                                    |
| 53``       | 3.69                 | 52         | 4.36                           | 52         | 4.34                                                    |
| 56         | 7.55                 | 53`        | 3.66                           | 53`        | 3.60                                                    |
| 57`        | 4.61                 | 53``       | 3.60                           | 53``       | 3.63                                                    |
| 57``       | 4.35                 | 56         | 8.56                           | 56         | 8.56                                                    |
| 59/62      | 7.34                 | 57`        | 4.36                           | 57`        | 4.23                                                    |
| 60/63      | 7.34                 | 57``       | 4.25                           | 57``       | 4.33                                                    |
| 67         | 8.70                 | 59/63      | 7.37                           | 59/63      | 7.34                                                    |
| 70`        | 3.90                 | 60/ 62     | 7.37                           | 60/62      | 7.34                                                    |
| 70``       | 3.77                 | 67         | 9.00                           | 67         | 8.91                                                    |
| 73         | 4.59                 | 70`/70``   | 3.95                           | 70`/70``   | 3.92                                                    |



### 3.2. Interproton distances

NOE build-ups were recorded without solvent suppression using mixing times of 100, 200, 300, 400, 500, 600 and 700 ms. The relaxation delay was set to 2.5 s, and 16 scans were recorded with 8192 and 512 data points in the direct (F2) and indirect (F1) dimension, respectively. Distances were calculated using germinal methylene protons (ref=1.78 Å) as reference (Table S3-S5). Interproton distances ( $r_{ij}$ ) were calculated according to the equation  $r_{ij}=r_{\text{ref}}(\sigma_{\text{ref}}/\sigma_{ij})^{(1/6)}$ . The NOE peak intensities were calculated according to the equation  $([\text{cross peak1} \times \text{cross peak2}]/[\text{diagonal peak1} \times \text{diagonal peak2}])^{0.5}$ . A minimum of 4 mixing times giving a linear ( $R^2 \geq 0.93$ ) build-up rate ( $\sigma_{ij}$ ) were used for quantification.

**Table S3.** Interproton distances (Å) for PROTAC 1 derived from NOE build-up measurements in CDCl<sub>3</sub> ( $\delta$  in ppm)

| No. | Proton A | Proton B  | $\delta_A$<br>(ppm) | $\delta_B$<br>(ppm) | $\sigma$  | $R^2$ | Dis.<br>$r_{ij}$ (Å) |
|-----|----------|-----------|---------------------|---------------------|-----------|-------|----------------------|
| 1   | 27       | 31''      | 8.80                | 4.68                | 6.09 E-07 | 0.98  | 3.4                  |
| 2   | 27       | 31'       | 8.80                | 4.79                | 4.48 E-07 | 0.99  | 3.6                  |
| 3   | 27       | 70''      | 8.80                | 3.77                | 3.82 E-07 | 0.97  | 3.7                  |
| 4   | 29       | 31''      | 7.26                | 4.68                | 3.23 E-06 | 0.99  | 2.6                  |
| 5   | 56       | 57'       | 7.55                | 4.61                | 2.86 E-06 | 0.97  | 2.6                  |
| 6   | 56       | 70''      | 7.55                | 3.77                | 5.83 E-06 | 0.96  | 3.4                  |
| 7   | 8/10     | 51'       | 7.52                | 2.45                | 5.30 E-06 | 0.99  | 4.5                  |
| 8   | 34       | 31''      | 7.31                | 4.68                | 2.26 E-06 | 0.97  | 2.7                  |
| 9   | 34       | 31'       | 7.31                | 4.79                | 6.90 E-06 | 0.95  | 2.7                  |
| 10  | 50       | 51''      | 4.71                | 2.22                | 2.07 E-06 | 0.97  | 2.3                  |
| 11  | 17       | 16'/18'   | 4.38                | 4.64                | 2.06 E-06 | 0.99  | 1.9                  |
| 12  | 17       | 16''/18'' | 4.38                | 3.68                | 1.23 E-06 | 0.99  | 2.1                  |
| 13  | 53'      | 51'       | 4.06                | 2.45                | 1.28 E-06 | 0.95  | 3.0                  |

**Table S4.** Interproton distances (Å) for PROTAC **1** derived from NOE build-up measurements in DMSO- $d_6$  ( $\delta$  in ppm)

| No. | Proton A | Proton B | $\delta_A$ (ppm) | $\delta_B$ (ppm) | $\sigma$  | R <sup>2</sup> | Dis. $r_{ij}$ (Å) |
|-----|----------|----------|------------------|------------------|-----------|----------------|-------------------|
| 1   | 27       | 17       | 8.89             | 4.38             | 3.05 E-06 | 0.99           | 3.47              |
| 2   | 27       | 31       | 8.89             | 4.82             | 5.71 E-07 | 0.99           | 3.13              |
| 3   | 56       | 31       | 8.56             | 4.82             | 6.99 E-07 | 0.98           | 4.44              |
| 4   | 56       | 51''     | 8.56             | 1.89             | 5.02 E-06 | 0.99           | 3.2               |
| 5   | 56       | 51'      | 8.56             | 2.05             | 9.24 E-06 | 0.99           | 3.1               |
| 6   | 56       | 53'      | 8.56             | 3.66             | 5.63 E-07 | 0.98           | 4.6               |
| 7   | 56       | 57'      | 8.56             | 4.36             | 2.61 E-05 | 0.98           | 2.43              |
| 8   | 56       | 50       | 8.56             | 4.44             | 1.20 E-07 | 0.99           | 1.94              |
| 9   | 34       | 29       | 8.34             | 7.65             | 9.11 E-06 | 0.99           | 2.89              |
| 10  | 34       | 31       | 8.34             | 4.82             | 1.91 E-05 | 0.99           | 2.56              |
| 11  | 34       | 41       | 8.34             | 7.42             | 1.19 E-06 | 0.97           | 4.06              |
| 12  | 29       | 35''     | 7.65             | 3.35             | 4.94 E-06 | 0.97           | 4.63              |
| 13  | 29       | 31       | 7.65             | 4.82             | 1.48 E-06 | 0.99           | 2.1               |
| 14  | 41       | 53''     | 7.42             | 3.60             | 8.23 E-06 | 0.99           | 2.78              |
| 15  | 41       | 70       | 7.42             | 3.95             | 1.02 E-05 | 0.99           | 2.84              |
| 16  | 41       | 53'      | 7.42             | 3.66             | 7.35 E-05 | 0.96           | 4.02              |
| 17  | 42       | 53''     | 4.57             | 3.60             | 6.69 E-05 | 0.99           | 2.08              |
| 18  | 42       | 53'      | 4.57             | 3.66             | 6.48 E-06 | 0.99           | 2.09              |
| 19  | 42       | 70       | 4.57             | 3.95             | 1.58 E-06 | 0.99           | 3.87              |
| 20  | 50       | 53'      | 4.44             | 3.66             | 2.11 E-06 | 0.96           | 3.69              |
| 21  | 50       | 51'      | 4.44             | 2.05             | 6.48 E-05 | 0.98           | 2.09              |
| 22  | 50       | 51''     | 4.44             | 1.89             | 1.60 E-07 | 0.98           | 2.14              |
| 23  | 52       | 53'      | 4.36             | 4.36             | 5.50 E-06 | 0.99           | 2.16              |
| 24  | 52       | 53''     | 4.36             | 3.60             | 6.11 E-06 | 0.99           | 2.29              |
| 25  | 53'      | 51'      | 3.60             | 2.05             | 5.52 E-06 | 0.95           | 3.15              |
| 26  | 53''     | 51''     | 3.60             | 1.89             | 1.01 E-05 | 0.99           | 3.14              |
| 27  | 53''     | 51'      | 3.60             | 2.05             | 4.52 E-06 | 0.96           | 2.14              |

**Table S5.** Interproton distances (Å) for PROTAC **1** derived from NOE build-up measurements in DMSO-*d*<sub>6</sub>:D<sub>2</sub>O (10:1) (δ in ppm)

| No. | Proton A | Proton B | δA (ppm) | δA (ppm) | σ          | R <sup>2</sup> | Dis. r <sub>ij</sub> (Å) |
|-----|----------|----------|----------|----------|------------|----------------|--------------------------|
| 1   | 42       | 50       | 4.54     | 4.43     | 5.48E-06   | 0.99           | 3.87                     |
| 2   | 42       | 70       | 4.54     | 3.92     | 5.39E-06   | 0.99           | 3.94                     |
| 3   | 41       | 70       | 7.42     | 3.92     | 5.87E-05   | 0.98           | 2.61                     |
| 4   | 50       | 51''     | 4.43     | 2.06     | 0.000141   | 0.99           | 2.11                     |
| 5   | 50       | 51'      | 4.43     | 1.89     | 5.85E-05   | 0.93           | 2.44                     |
| 6   | 57'      | 51''     | 4.22     | 2.06     | 2.14E-06   | 0.93           | 4.24                     |
| 7   | 53'      | 51'      | 3.61     | 1.89     | 4.97E-05   | 0.99           | 2.68                     |
| 8   | 56       | 53'      | 3.60     | 3.61     | 3.02E-06   | 0.92           | 4.00                     |
| 9   | 42       | 53'      | 4.54     | 3.61     | 0.00038235 | 0.99           | 1.90                     |
| 10  | 50       | 53'      | 4.43     | 3.61     | 1.61E-05   | 0.99           | 3.23                     |
| 11  | 27       | 31       | 8.85     | 4.78     | 1.94E-05   | 0.99           | 2.94                     |
| 12  | 27       | 18       | 8.85     | 1.83     | 2.48E-06   | 0.96           | 4.14                     |
| 13  | 31       | 35'      | 4.78     | 3.34     | 2.5E-06    | 0.92           | 4.13                     |
| 14  | 31       | 35''     | 4.78     | 3.29     | 1.53E-06   | 0.95           | 4.48                     |
| 15  | 36       | 35'      | 3.47     | 3.32     | 5.37E-05   | 0.99           | 2.64                     |
| 16  | 29       | 50       | 7.59     | 4.43     | 1.51E-06   | 0.96           | 4.49                     |
| 17  | 31       | 57'      | 4.78     | 3.61     | 1E-06      | 0.94           | 4.81                     |
| 18  | 31       | 50       | 4.78     | 4.43     | 3.08E-06   | 0.99           | 3.99                     |

**Table S6.** <sup>3</sup>J<sub>HH</sub> coupling constants for PROTAC **1** in CDCl<sub>3</sub>, DMSO-*d*<sub>6</sub> and DMSO-*d*<sub>6</sub>:D<sub>2</sub>O (10:1) (δ ppm)

| CDCl <sub>3</sub> |                  |      |      |                                   | DMSO- <i>d</i> <sub>6</sub> |                  |      |      |                                   | DMSO- <i>d</i> <sub>6</sub> :D <sub>2</sub> O (10:1) |                  |      |      |                                   |
|-------------------|------------------|------|------|-----------------------------------|-----------------------------|------------------|------|------|-----------------------------------|------------------------------------------------------|------------------|------|------|-----------------------------------|
| <sup>1</sup> H A  | <sup>1</sup> H B | δA   | δB   | <sup>3</sup> J <sub>HH</sub> (Hz) | <sup>1</sup> H A            | <sup>1</sup> H B | δA   | δB   | <sup>3</sup> J <sub>HH</sub> (Hz) | <sup>1</sup> H A                                     | <sup>1</sup> H B | δA   | δB   | <sup>3</sup> J <sub>HH</sub> (Hz) |
| 57'               | 56               | 4.61 | 7.55 | 5.42                              | 57'                         | 56               | 4.36 | 8.56 | 4.3                               | 57'                                                  | 56               | 4.22 | 3.60 | 5.6                               |
| 53'               | 52               | 4.06 | 4.59 | 3.42                              | 53'                         | 52               | 3.66 | 4.36 | 3.96                              | 42                                                   | 41               | 4.54 | 7.42 | 9.6                               |
| 51'               | 50               | 2.22 | 4.71 | 7.62                              | 42                          | 41               | 4.57 | 7.42 | 9.54                              | 34                                                   | 35'              | 8.38 | 3.32 | 5.9                               |

#### 4. Monte Carlo molecular mechanics (MCMM) conformational search

The theoretical conformation ensemble of PROTAC **1** was identified by performing careful Monte Carlo conformational analysis using five different (OPLS, OPLS-2005, OPLS3e, AMBER\* and MMFF) force fields, each with the GB/SA solvation models chloroform and

water. These conformational searches were done using the Monte Carlo algorithm with intermediate torsion sampling, 50 000 Monte Carlo steps and a RMSD cut-off set to 2.0 Å. A Molecular Mechanics energy minimization was performed as implemented in the MacroModel BatchMin V12.1 of the Schrödinger Package.<sup>10</sup> Each conformation was energy minimized using Polak-Ribière type conjugate gradient (PRCG) with a maximum of 5000 iterative steps. All conformations within 42 kJ/mol from the global minimum were saved. Results of all the different conformational searches are given in Table S7. All ensembles generated by the conformational searches were combined and elimination of redundant conformations was performed by comparison of heavy atom coordinates applying an RMSD cutoff set to 3.0 Å giving the final ensemble used for NAMFIS-analysis.

**Table S7.** Result of the MCMM conformational analysis

| Force fields        | Solvent           |                  | Following redundant conformer elimination |
|---------------------|-------------------|------------------|-------------------------------------------|
|                     | CHCl <sub>3</sub> | H <sub>2</sub> O |                                           |
| OPLS                | 134               | 967              |                                           |
| OPLS3e              | 508               | 1733             |                                           |
| OPLS 2005           | 1259              | 3037             | 152                                       |
| MMFF                | 1935              | 1394             |                                           |
| AMBER*              | 2323              | 2263             |                                           |
| Final ensemble used |                   |                  | 152                                       |

### 5. Identifications of solution ensemble using the NAMFIS algorithm

Solution ensembles were determined by fitting the experimentally measured distances and coupling constants to those back-calculated from computationally predicted conformations using NAMFIS algorithm.<sup>3,4</sup> Methylene protons were treated according to the equation  $d = (((d_1^{-6}) + (d_2^{-6}))/2)^{-1/6}$ , and methyl protons according to  $d = (((d_1^{-6}) + (d_2^{-6}) + (d_3^{-6}))/3)^{-1/6}$ . The back-calculated  $J$ -coupling constants were generated according to the following Karplus equation  ${}^3J_{\text{HH}} = 9.4 * ((\text{COS}(\theta))^2) - (1.1 * (\text{COS}(\theta))) + 0.4$ .

The NAMFIS output solution ensembles were validated using standard methods, i.e. through evaluation of the reliability of the conformational restraints by the addition of 10% random noise to the experimental data, by the random removal of individual restraints, and by comparison of the experimentally observed and back-calculated distances.

Additional validation step was performed by comparing the solution ensembles for specific parts of the PROTAC **1**, when feeding the NAMFIS algorithm with specific sets of NOE proton-proton distances, which describe certain parts of the molecule. Thus, the NAMFIS output obtained using all distances was compared to the NAMFIS outputs obtained using distances from the POI-ligand part only (H27-H34), and the VHL E3 ligase ligand part only (H70-H56). Using this, we evaluated whether long-range restraints (distances from POI ligand to VHL E3 ligase ligand) over-restrained the compound, possibly falsifying the conformation of parts of the molecule that are well-described by local NOE- and *J*-restraints. Comparison of RMSD values and dihedral angles of these specific regions of the molecule in ensembles derived from NAMFIS analysis including either restraints for a specific region only, or for the entire molecule indicated that the long-range restraints did not distort the conformation of the well-described (NOE, *J*) POI and VHL E3 parts of the molecule. The interatomic distances, *J*-couplings and populations of the validated conformational ensembles are given in Tables S8-S10.

**Table S8.** Experimentally determined and back-calculated distances (NAMFIS output) interproton distances (Å)

| Interproton distances<br>CDCl <sub>3</sub> |               | Interproton distances<br>DMSO- <i>d</i> <sub>6</sub> |               | Interproton distances<br>DMSO- <i>d</i> <sub>6</sub> :D <sub>2</sub> O<br>(10:1) |               |
|--------------------------------------------|---------------|------------------------------------------------------|---------------|----------------------------------------------------------------------------------|---------------|
| Exp.-dist(Å)                               | Calc.-dist(Å) | Exp.-dist(Å)                                         | Calc.-dist(Å) | Exp.-dist(Å)                                                                     | Calc.-dist(Å) |
| 3.40                                       | 3.38          | 3.47                                                 | 3.87          | 3.87                                                                             | 3.88          |
| 3.58                                       | 3.57          | 3.13                                                 | 3.13          | 3.94                                                                             | 4.50          |
| 3.67                                       | 3.72          | 4.44                                                 | 4.00          | 2.61                                                                             | 2.64          |
| 2.57                                       | 2.51          | 3.20                                                 | 3.35          | 2.11                                                                             | 2.39          |
| 2.63                                       | 2.65          | 3.10                                                 | 3.35          | 2.44                                                                             | 2.90          |
| 3.42                                       | 3.74          | 4.60                                                 | 4.71          | 4.24                                                                             | 4.44          |
| 4.51                                       | 4.39          | 2.43                                                 | 2.61          | 2.68                                                                             | 3.08          |
| 2.70                                       | 2.74          | 1.94                                                 | 2.24          | 4.00                                                                             | 3.85          |
| 2.73                                       | 2.77          | 2.89                                                 | 3.04          | 1.90                                                                             | 2.15          |
| 2.27                                       | 2.72          | 2.56                                                 | 2.92          | 3.23                                                                             | 3.67          |
| 1.89                                       | 2.37          | 4.06                                                 | 3.91          | 2.94                                                                             | 2.40          |
| 2.06                                       | 2.55          | 4.63                                                 | 4.76          | 4.14                                                                             | 4.47          |
| 3.00                                       | 3.60          | 2.10                                                 | 2.50          | 4.13                                                                             | 4.53          |
|                                            |               | 2.78                                                 | 3.25          | 4.48                                                                             | 4.62          |
|                                            |               | 2.84                                                 | 3.00          | 2.64                                                                             | 2.68          |
|                                            |               | 4.02                                                 | 3.50          | 4.49                                                                             | 4.50          |
|                                            |               | 2.08                                                 | 2.36          | 4.81                                                                             | 4.80          |
|                                            |               | 2.09                                                 | 2.36          | 3.99                                                                             | 4.04          |
|                                            |               | 3.87                                                 | 4.27          |                                                                                  |               |
|                                            |               | 3.69                                                 | 3.87          |                                                                                  |               |
|                                            |               | 2.09                                                 | 2.54          |                                                                                  |               |
|                                            |               | 3.15                                                 | 3.12          |                                                                                  |               |
|                                            |               | 3.14                                                 | 2.86          |                                                                                  |               |
|                                            |               | 3.62                                                 | 3.55          |                                                                                  |               |
|                                            |               | 2.14                                                 | 2.54          |                                                                                  |               |
|                                            |               | 2.16                                                 | 2.51          |                                                                                  |               |
|                                            |               | 2.29                                                 | 2.51          |                                                                                  |               |
|                                            |               | 1.78                                                 | 1.76          |                                                                                  |               |
| RMSD                                       | 0.49          | RMSD                                                 | 0.37          | RMSD                                                                             | 0.30          |

**Table S9.** Experimentally determined and back-calculated coupling constants (NAMFIS output)

| CDCl <sub>3</sub> |              | DMSO- <i>d</i> <sub>6</sub> |              | DMSO- <i>d</i> <sub>6</sub> :D <sub>2</sub> O (10:1) |              |
|-------------------|--------------|-----------------------------|--------------|------------------------------------------------------|--------------|
| Exp.dist(Å)       | Calc.dist(Å) | Exp.dist(Å)                 | Calc.dist(Å) | Exp.dist(Å)                                          | Calc.dist(Å) |
| 5.4               | 5.5          | 4.3                         | 5.3          | 5.6                                                  | 5.6          |
| 3.4               | 2.4          | 4.0                         | 3.8          | 9.6                                                  | 8.9          |
| 7.6               | 6.6          | 9.5                         | 8.7          | 5.8                                                  | 5.5          |
| RMSD              | 0.82         | RMSD                        | 0.74         | RMSD                                                 | 0.42         |

**Table S10.** Conformational populations derived by NAMFIS-analysis of PROTAC **1** in CDCl<sub>3</sub>, DMSO-*d*<sub>6</sub> and DMSO-*d*<sub>6</sub>:D<sub>2</sub>O (10:1) solution. Coordinates for the conformations below are available at pages S23-S86 of the Supporting Information.

| CDCl <sub>3</sub> |                | DMSO- <i>d</i> <sub>6</sub> |                | DMSO- <i>d</i> <sub>6</sub> :D <sub>2</sub> O (10:1) |                |
|-------------------|----------------|-----------------------------|----------------|------------------------------------------------------|----------------|
| Conf. No.         | Population (%) | Conf. No.                   | Population (%) | Conf. No.                                            | Population (%) |
| 1                 | 30             | 9                           | 40             | 15                                                   | 17             |
| 2                 | 20             | 10                          | 20             | 16                                                   | 16             |
| 3                 | 15             | 11                          | 16             | 17                                                   | 15             |
| 4                 | 10             | 12                          | 13             | 18                                                   | 13             |
| 5                 | 7              | 13                          | 4              | 19                                                   | 11             |
| 6                 | 4              | 14                          | 3              | 20                                                   | 7              |
| 7                 | 3              |                             |                | 21                                                   | 5              |
| 8                 | 3              |                             |                | 22                                                   | 5              |
|                   |                |                             |                | 23                                                   | 5              |
|                   |                |                             |                | 24                                                   | 4              |

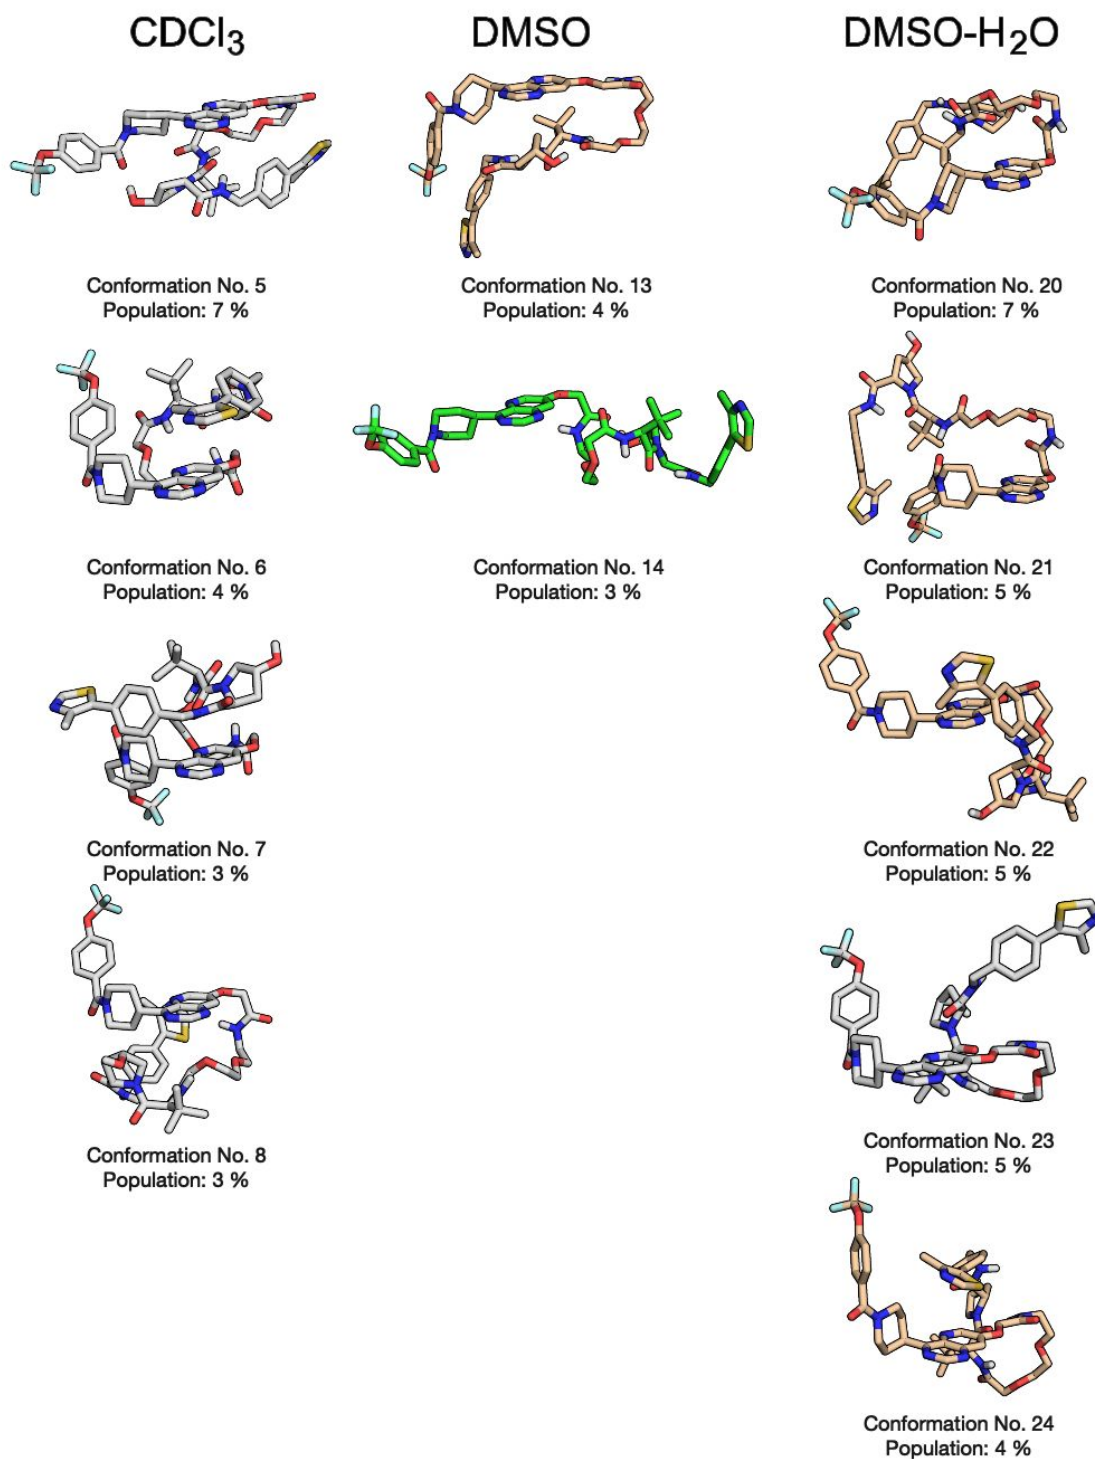

**Figure S2.** Structures of the minor conformations (population <10%) in the ensembles adopted by **1** in chloroform, DMSO and DMSO-water (10:1). Conformations that are predominantly linear are in green, those that are folded with one turn are in wheat, while folded conformations with two turns are in grey. The number and population in % is given below each conformation. To facilitate comparisons, all conformations are shown having the pyrimidine moiety of the ERK5 binding ligand of **1** in the same orientation. Intramolecular hydrogen bonds are indicated with dashed black lines.



## **6. Computational characterization of reported VHL PROTACs and of PROTAC 1**

### **6.1. Molecular property analysis**

We compared the molecular properties of VHL PROTAC 1 to the set of VHL PROTACs compiled by Maple et al.<sup>5</sup> In brief, Maple et al. compiled a set of 218 VHL PROTACs from the literature and analyzed them in detail from a chemical space perspective. Herein, we first removed duplicates from the set of Maple et al. by analysis of their SMILES representations. The SMILES code for each compound was then converted into structures using the MOE modeling software (version 2014.09).<sup>6</sup> Subsequently, physicochemical descriptors that are commonly used to characterize compounds in drug discovery were calculated, i.e. the molecular weight (MW) and descriptor of molecular polarity (HBA, HBD and TPSA), lipophilicity (cLogP) and flexibility (NRotB). Molecular properties were analyzed and plotted using RStudio (version 3.4.4).<sup>7</sup>

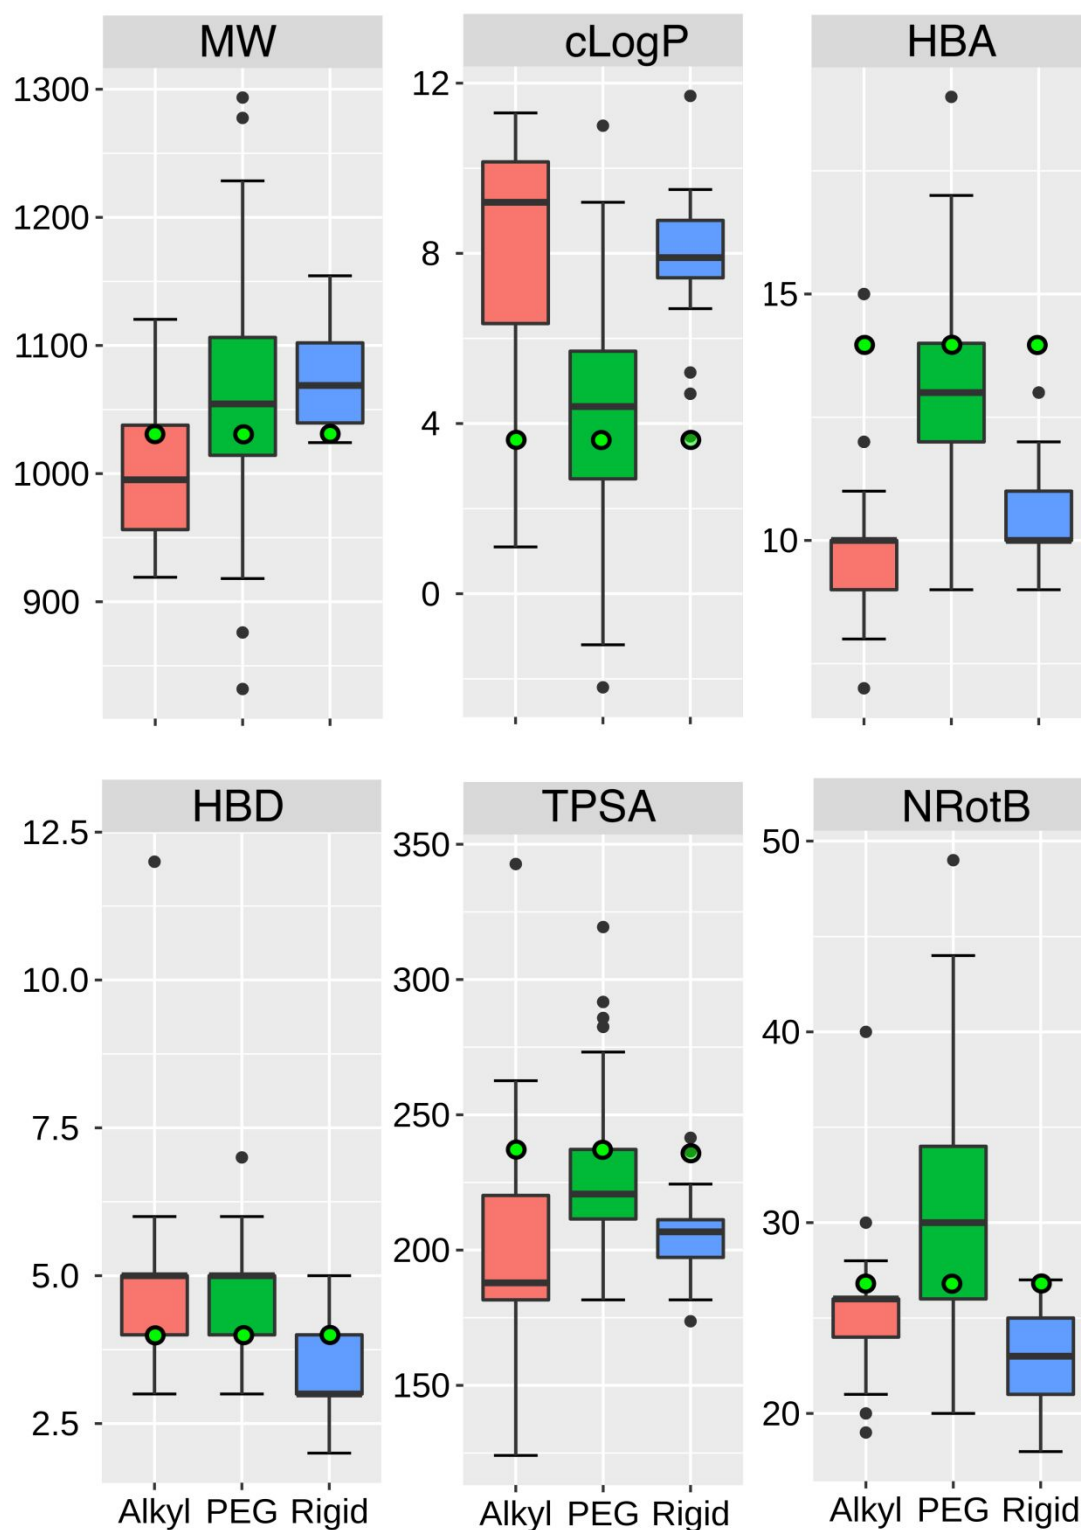

**Figure S3.** Molecular weight (MW, Da), lipophilicity (cLogP), hydrogen bond acceptors and donors (HBA and HBD), topological polar surface area (TPSA, Å<sup>2</sup>), and the number of rotatable bonds (NRotB) calculated for PROTAC 1 and the three subsets of VHL PROTACs that have aliphatic (alkyl, n=63), ethylene glycol based (PEG, n=135) or rigid (n=19) linkers

reported by Maple, et al.<sup>5</sup> The values of the six descriptors calculated for **1** are shown as green circles (MW = 1034 Da, cLogP = 3.55, HBA = 14, HBD = 4, TPSA = 237 Å<sup>2</sup>, NRotB = 27). Boxplots show the 50<sup>th</sup> percentiles as horizontal bars, the 25<sup>th</sup> and 75<sup>th</sup> percentiles as boxes, the 25<sup>th</sup> percentile minus 1.5 x the interquartile range and the 75<sup>th</sup> percentile plus 1.5 x the interquartile range as whiskers for the three subset of PROTACs.

## 6.2. Calculation of descriptors for conformers in the solution ensembles

Prior to the calculation of 3D molecular descriptors for the 24 solution conformers of **1**, each conformer was thoroughly checked so that its structure was represented correctly. Subsequently, 3D descriptors that represent the molecular size (radius of gyration,  $R_{\text{gyr}}$ ) and surface polarity (solvent-accessible 3D polar surface area, SA 3D PSA) were calculated as described previously.<sup>8</sup> The two descriptors were then analyzed using the Data Warrior program.<sup>9</sup>

Intramolecular hydrogen bonds (IMHBs) were identified in the solution conformers using the Maestro program (available in the Schrödinger Suite)<sup>10</sup> with the default distance and angle parameters, i.e. a maximum distance between acceptor and donor of 2.8 Å and a minimum angle for donor and acceptor of 120° and 80°, respectively.

**Table S11.** Overview of solution conformations, calculated descriptors and intramolecular hydrogen bonds in each conformation of PROTAC **1** in the three solvents used for NMR spectroscopy.

| Solvent                                | Conf. No. | Popul. (%) | Descriptors <sup>a</sup>                 |                                   |                   | Conf. category |
|----------------------------------------|-----------|------------|------------------------------------------|-----------------------------------|-------------------|----------------|
|                                        |           |            | SA 3D PSA (Å <sup>2</sup> ) <sup>a</sup> | R <sub>gyr</sub> (Å) <sup>b</sup> | IMHB <sup>c</sup> |                |
| CDCl <sub>3</sub>                      | 1         | 30         | 202.0                                    | 5.5                               | 1                 | Major          |
|                                        | 2         | 20         | 182.6                                    | 5.8                               | 2                 | Major          |
|                                        | 3         | 15         | 194.5                                    | 5.6                               | 2                 | Major          |
|                                        | 4         | 10         | 241.5                                    | 8.1                               | 1                 | Major          |
|                                        | 5         | 7          | 172.4                                    | 6.2                               | 2                 | Minor          |
|                                        | 6         | 4          | 207.3                                    | 5.4                               | 1                 | Minor          |
|                                        | 7         | 3          | 207.1                                    | 5.8                               | 1                 | Minor          |
|                                        | 8         | 3          | 242.1                                    | 5.6                               | 1                 | Minor          |
| DMSO-d <sub>6</sub>                    | 9         | 40         | 198.8                                    | 7.4                               | 1                 | Major          |
|                                        | 10        | 20         | 205.9                                    | 5.2                               | 1                 | Major          |
|                                        | 11        | 16         | 202.3                                    | 9.2                               | 3                 | Major          |
|                                        | 12        | 13         | 258.9                                    | 9.7                               | 0                 | Major          |
|                                        | 13        | 4          | 200.5                                    | 6.3                               | 1                 | Minor          |
|                                        | 14        | 3          | 191.9                                    | 8.2                               | 2                 | Minor          |
| DMSO-d <sub>6</sub> - D <sub>2</sub> O | 15        | 17         | 238.9                                    | 6.0                               | 1 <sup>d</sup>    | Major          |
|                                        | 16        | 16         | 246.0                                    | 7.0                               | 1                 | Major          |
|                                        | 17        | 15         | 211.8                                    | 8.9                               | 1                 | Major          |
|                                        | 18        | 13         | 186.0                                    | 6.9                               | 2                 | Major          |
|                                        | 19        | 11         | 240.0                                    | 6.3                               | 1                 | Major          |
|                                        | 20        | 7          | 209.0                                    | 6.9                               | 2                 | Minor          |
|                                        | 21        | 5          | 248.8                                    | 7.1                               | 1                 | Minor          |
|                                        | 22        | 5          | 219.8                                    | 6.3                               | 1                 | Minor          |
|                                        | 23        | 5          | 242.6                                    | 6.1                               | 2                 | Minor          |
|                                        | 24        | 4          | 237.0                                    | 6.6                               | 1                 | Minor          |

<sup>a</sup>SA 3D PSA = solvent accessible 3D polar surface area. <sup>b</sup>R<sub>gyr</sub> (Å) = radius of gyration.

<sup>c</sup>IMHB = intramolecular hydrogen bond. <sup>d</sup>A three centered (bifurcated) intramolecular hydrogen bond.

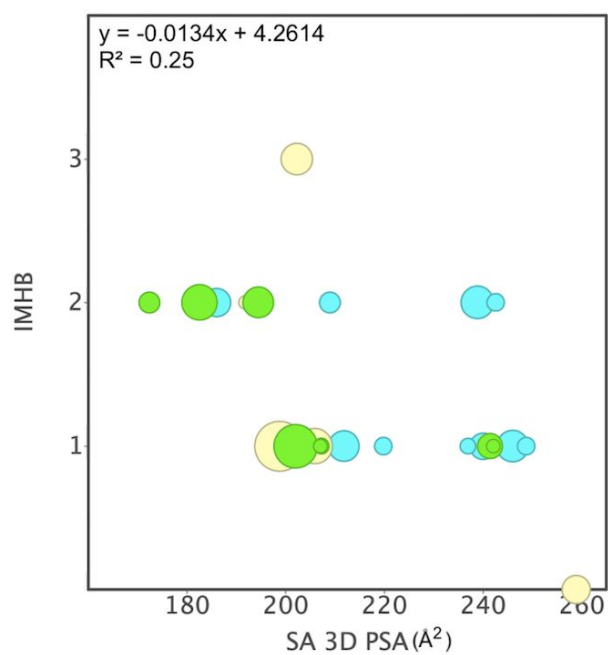

**Figure S4.** The number of intramolecular hydrogen bonds (IMHB) versus the solvent accessible 3D polar surface area (SA 3D PSA) for all solution conformations populated by **1**. Conformations in CDCl<sub>3</sub> are in green, those in DMSO-*d*<sub>6</sub> are in wheat while those in DMSO-*d*<sub>6</sub>-D<sub>2</sub>O are in blue. The area of each circle is proportional to the population of the corresponding conformation (in %).

### 6.3. Structural comparison of conformers in solution ensembles

**Table S12.** RMSD matrix for all conformations

| Conf. No | 1    | 2    | 3    | 4    | 5    | 6    | 7    | 8    | 9    | 10   | 11   | 12   | 13   | 14   | 15   | 16   | 17   | 18   | 19   | 20   | 21   | 22   | 23   |
|----------|------|------|------|------|------|------|------|------|------|------|------|------|------|------|------|------|------|------|------|------|------|------|------|
| 1        | 0    |      |      |      |      |      |      |      |      |      |      |      |      |      |      |      |      |      |      |      |      |      |      |
| 2        | 3.78 |      |      |      |      |      |      |      |      |      |      |      |      |      |      |      |      |      |      |      |      |      |      |
| 3        | 4.87 | 5.19 |      |      |      |      |      |      |      |      |      |      |      |      |      |      |      |      |      |      |      |      |      |
| 4        | 6.46 | 6.41 | 4.83 |      |      |      |      |      |      |      |      |      |      |      |      |      |      |      |      |      |      |      |      |
| 5        | 5.26 | 6.23 | 4.60 | 4.63 |      |      |      |      |      |      |      |      |      |      |      |      |      |      |      |      |      |      |      |
| 6        | 4.51 | 5.29 | 5.44 | 6.62 | 5.53 |      |      |      |      |      |      |      |      |      |      |      |      |      |      |      |      |      |      |
| 7        | 6.11 | 5.85 | 5.88 | 6.21 | 4.98 | 4.82 |      |      |      |      |      |      |      |      |      |      |      |      |      |      |      |      |      |
| 8        | 3.37 | 4.52 | 5.39 | 5.74 | 5.25 | 5.25 | 5.50 |      |      |      |      |      |      |      |      |      |      |      |      |      |      |      |      |
| 9        | 6.14 | 6.51 | 5.74 | 4.24 | 5.70 | 5.82 | 6.78 | 5.20 |      |      |      |      |      |      |      |      |      |      |      |      |      |      |      |
| 10       | 4.41 | 4.78 | 5.59 | 7.47 | 6.01 | 4.73 | 4.12 | 4.75 | 7.13 |      |      |      |      |      |      |      |      |      |      |      |      |      |      |
| 11       | 8.28 | 7.60 | 7.61 | 5.47 | 5.98 | 7.31 | 6.86 | 7.11 | 5.48 | 8.32 |      |      |      |      |      |      |      |      |      |      |      |      |      |
| 12       | 8.46 | 7.73 | 8.56 | 6.06 | 6.69 | 7.21 | 7.34 | 7.93 | 6.01 | 8.92 | 3.12 |      |      |      |      |      |      |      |      |      |      |      |      |
| 13       | 4.32 | 3.20 | 5.53 | 6.42 | 5.75 | 6.01 | 6.42 | 4.95 | 6.20 | 6.08 | 8.03 | 8.22 |      |      |      |      |      |      |      |      |      |      |      |
| 14       | 7.44 | 6.40 | 6.67 | 4.71 | 5.73 | 6.50 | 5.66 | 6.85 | 4.92 | 7.85 | 3.95 | 3.45 | 6.84 |      |      |      |      |      |      |      |      |      |      |
| 15       | 4.38 | 4.73 | 5.00 | 7.64 | 6.51 | 3.92 | 6.40 | 5.49 | 6.62 | 5.25 | 9.26 | 9.42 | 4.86 | 8.22 |      |      |      |      |      |      |      |      |      |
| 16       | 6.37 | 5.23 | 4.69 | 5.13 | 4.22 | 6.92 | 6.29 | 5.73 | 5.70 | 6.91 | 5.31 | 6.13 | 5.23 | 5.14 | 6.46 |      |      |      |      |      |      |      |      |
| 17       | 8.23 | 7.10 | 6.86 | 4.42 | 5.37 | 7.01 | 6.54 | 7.71 | 5.64 | 8.56 | 3.39 | 3.77 | 7.24 | 4.17 | 8.38 | 5.11 |      |      |      |      |      |      |      |
| 18       | 5.83 | 5.97 | 4.61 | 4.18 | 5.49 | 5.52 | 6.14 | 4.93 | 3.80 | 6.78 | 6.33 | 6.51 | 5.95 | 4.90 | 6.17 | 5.39 | 5.92 |      |      |      |      |      |      |
| 19       | 4.69 | 4.30 | 3.70 | 6.14 | 6.00 | 6.11 | 6.53 | 5.38 | 6.33 | 4.95 | 8.72 | 9.18 | 4.65 | 7.30 | 3.86 | 4.80 | 8.00 | 5.32 |      |      |      |      |      |
| 20       | 5.64 | 5.06 | 5.00 | 4.74 | 5.20 | 5.90 | 5.49 | 5.49 | 4.37 | 6.92 | 5.94 | 5.99 | 4.91 | 3.86 | 6.32 | 4.29 | 5.45 | 3.91 | 4.97 |      |      |      |      |
| 21       | 4.86 | 5.01 | 5.81 | 6.89 | 6.53 | 4.79 | 5.54 | 5.37 | 6.21 | 5.49 | 8.17 | 7.63 | 4.97 | 6.29 | 4.38 | 6.37 | 7.32 | 5.76 | 4.90 | 4.51 |      |      |      |
| 22       | 6.07 | 6.01 | 4.04 | 3.54 | 5.23 | 5.74 | 6.25 | 5.73 | 3.89 | 7.03 | 6.42 | 6.85 | 5.97 | 5.51 | 5.75 | 4.84 | 5.24 | 3.75 | 4.86 | 4.50 | 5.62 |      |      |
| 23       | 4.23 | 4.32 | 5.58 | 5.85 | 5.43 | 4.10 | 4.75 | 4.89 | 6.48 | 5.05 | 6.72 | 7.06 | 4.84 | 6.57 | 5.08 | 6.68 | 5.60 | 6.15 | 6.38 | 6.16 | 5.87 | 5.50 |      |
| 24       | 4.05 | 4.53 | 4.93 | 5.82 | 6.21 | 4.65 | 6.65 | 3.92 | 4.68 | 5.97 | 7.17 | 7.50 | 4.79 | 6.63 | 4.69 | 6.79 | 7.06 | 4.46 | 5.01 | 5.34 | 5.37 | 5.43 | 4.48 |

## 7. Coordinates for the conformations (1-24)

| conformer_1 |           |           |           |
|-------------|-----------|-----------|-----------|
| F           | -3.692904 | 8.516063  | -0.727684 |
| C           | -3.039904 | 7.299463  | -0.704484 |
| F           | -3.770704 | 6.471463  | 0.131416  |
| F           | -3.036904 | 6.824863  | -2.005584 |
| O           | -1.707304 | 7.564163  | -0.203684 |
| C           | -0.763004 | 6.575363  | -0.040684 |
| C           | -0.968304 | 5.211563  | -0.337284 |
| C           | 0.056596  | 4.275063  | -0.138084 |
| C           | 1.307596  | 4.677963  | 0.350916  |
| C           | 2.384196  | 3.673663  | 0.569416  |
| N           | 2.759696  | 2.855963  | -0.432484 |
| C           | 2.615696  | 3.135763  | -1.864684 |
| C           | 1.832596  | 2.015663  | -2.550884 |
| C           | 2.491596  | 0.646563  | -2.300984 |
| C           | 1.755996  | -0.482137 | -3.027084 |
| C           | 2.246996  | -1.803337 | -3.073484 |
| N           | 3.390296  | -2.131237 | -2.458884 |
| C           | 3.759496  | -3.417137 | -2.488784 |
| C           | 3.045196  | -4.429237 | -3.121084 |
| O           | 3.513396  | -5.721237 | -3.011784 |
| C           | 2.789396  | -6.835837 | -3.593684 |
| C           | 1.539296  | -7.215037 | -2.793984 |
| N           | 1.474496  | -6.754637 | -1.545184 |
| C           | 0.357596  | -6.953637 | -0.637884 |
| C           | -0.789804 | -6.001237 | -0.986284 |
| O           | -0.296204 | -4.653137 | -1.034484 |
| C           | -1.237004 | -3.702537 | -1.567484 |
| C           | -2.389804 | -3.438637 | -0.592284 |
| O           | -1.841504 | -3.205037 | 0.705216  |
| C           | -2.838004 | -3.156637 | 1.736216  |
| C           | -2.066104 | -2.915137 | 3.025816  |
| N           | -0.749704 | -2.839237 | 2.852316  |
| C           | 0.258696  | -2.513337 | 3.839416  |
| C           | 1.159996  | -3.742937 | 4.149516  |
| C           | 1.755596  | -4.441837 | 2.911116  |
| C           | 0.330296  | -4.795637 | 4.905116  |
| C           | 2.311996  | -3.327937 | 5.080216  |
| C           | 0.993096  | -1.301137 | 3.235116  |
| N           | 1.004196  | -0.106437 | 3.850216  |
| C           | 0.393596  | 0.279163  | 5.124616  |
| C           | -1.086604 | 0.612963  | 4.892216  |
| N           | -1.440604 | 0.758163  | 3.616116  |
| C           | -2.776404 | 1.001063  | 3.120716  |
| C           | -2.676404 | 1.214063  | 1.624216  |
| C           | -1.866804 | 0.379363  | 0.831716  |
| C           | -1.782604 | 0.581863  | -0.554684 |

|   |           |           |           |
|---|-----------|-----------|-----------|
| C | -2.518104 | 1.610763  | -1.164084 |
| C | -2.452704 | 1.813563  | -2.625584 |
| C | -2.962604 | 0.918863  | -3.568284 |
| C | -3.692004 | -0.382637 | -3.295784 |
| N | -2.734904 | 1.370163  | -4.891784 |
| C | -2.124804 | 2.502563  | -4.866984 |
| S | -1.734404 | 3.192563  | -3.333184 |
| C | -3.319004 | 2.449363  | -0.374484 |
| C | -3.394704 | 2.254363  | 1.013816  |
| O | -1.880304 | 0.711463  | 5.826516  |
| C | 1.173096  | 1.516663  | 5.575316  |
| C | 1.528396  | 2.190363  | 4.253016  |
| O | 2.689996  | 3.012263  | 4.372516  |
| C | 1.778796  | 1.002263  | 3.321116  |
| O | 1.496996  | -1.411937 | 2.119716  |
| O | -2.632004 | -2.792837 | 4.111316  |
| O | 0.651596  | -7.897737 | -3.303884 |
| C | 1.889696  | -4.058437 | -3.807884 |
| C | 1.484496  | -2.730437 | -3.779084 |
| N | 0.368796  | -2.375237 | -4.415984 |
| C | -0.025404 | -1.101037 | -4.357684 |
| N | 0.628596  | -0.161537 | -3.669484 |
| C | 2.575696  | 0.457563  | -0.774584 |
| C | 3.420996  | 1.582563  | -0.171484 |
| O | 2.889296  | 3.605063  | 1.690216  |
| C | 1.516796  | 6.028863  | 0.660016  |
| C | 0.489996  | 6.967563  | 0.460816  |
| H | -1.904804 | 4.840263  | -0.719684 |
| H | -0.121904 | 3.232563  | -0.355484 |
| H | 3.611296  | 3.177963  | -2.307184 |
| H | 2.128696  | 4.084563  | -2.082484 |
| H | 1.807396  | 2.232563  | -3.619384 |
| H | 0.816696  | 2.019763  | -2.155684 |
| H | 3.504696  | 0.684663  | -2.702984 |
| H | 4.666696  | -3.697137 | -1.971684 |
| H | 3.457696  | -7.696837 | -3.579284 |
| H | 2.530696  | -6.636237 | -4.633784 |
| H | 2.256596  | -6.203237 | -1.219584 |
| H | 0.693496  | -6.738037 | 0.376716  |
| H | 0.007596  | -7.985437 | -0.680484 |
| H | -1.555504 | -6.104837 | -0.217884 |
| H | -1.210404 | -6.282437 | -1.951884 |
| H | -1.625204 | -4.029337 | -2.541284 |
| H | -0.702604 | -2.753137 | -1.701484 |
| H | -3.069704 | -4.300437 | -0.571984 |
| H | -2.947404 | -2.552337 | -0.921984 |
| H | -3.376304 | -4.102537 | 1.801716  |
| H | -3.532704 | -2.335037 | 1.558616  |
| H | -0.449804 | -2.923137 | 1.885916  |
| H | -0.241104 | -2.247937 | 4.765316  |



|   |           |           |           |
|---|-----------|-----------|-----------|
| H | 2.440996  | -3.783037 | 2.380716  |
| H | 2.316396  | -5.322437 | 3.224416  |
| H | 0.969996  | -4.764337 | 2.227716  |
| H | -0.103504 | -4.359537 | 5.805216  |
| H | -0.472504 | -5.175037 | 4.273216  |
| H | 0.960396  | -5.636037 | 5.197016  |
| H | 1.914496  | -2.813337 | 5.955416  |
| H | 2.861696  | -4.209337 | 5.410916  |
| H | 3.010596  | -2.667537 | 4.566516  |
| H | 0.500096  | -0.484537 | 5.894416  |
| H | -0.705904 | 0.635363  | 2.934716  |
| H | -3.207804 | 1.878363  | 3.603316  |
| H | -3.398104 | 0.127463  | 3.318216  |
| H | -1.309004 | -0.433237 | 1.271316  |
| H | -1.156704 | -0.063937 | -1.154684 |
| H | -3.860204 | -0.545737 | -2.232484 |
| H | -4.657404 | -0.357537 | -3.800684 |
| H | -3.104904 | -1.211237 | -3.691384 |
| H | -1.867904 | 3.004263  | -5.789484 |
| H | -3.885504 | 3.245963  | -0.835784 |
| H | -4.017504 | 2.905563  | 1.610416  |
| H | 2.088196  | 1.195163  | 6.073616  |
| H | 0.592596  | 2.167063  | 6.230116  |
| H | 0.683896  | 2.775363  | 3.887116  |
| H | 2.899296  | 3.316563  | 3.466616  |
| H | 1.458496  | 1.254063  | 2.309816  |
| H | 2.837496  | 0.740063  | 3.329816  |
| H | 1.278296  | -4.765937 | -4.343184 |
| H | -0.922004 | -0.813437 | -4.889284 |
| H | 3.049196  | -0.484137 | -0.507184 |
| H | 1.574396  | 0.478563  | -0.341684 |
| H | 3.531696  | 1.375863  | 0.891516  |
| H | 4.414096  | 1.581963  | -0.621584 |
| H | 2.473396  | 6.346063  | 1.049816  |
| H | 0.666696  | 8.006663  | 0.698616  |

conformer\_2

|   |           |          |           |
|---|-----------|----------|-----------|
| F | -3.558004 | 3.753676 | -1.863362 |
| C | -2.340265 | 3.930701 | -1.241011 |
| F | -2.174082 | 5.290561 | -1.044912 |
| F | -2.367903 | 3.256562 | -0.035468 |
| O | -1.348340 | 3.373772 | -2.123014 |
| C | 0.003103  | 3.562688 | -1.940571 |
| C | 0.596593  | 4.042984 | -0.749967 |
| C | 1.990100  | 4.222498 | -0.664660 |
| C | 2.826256  | 3.931489 | -1.759458 |
| C | 4.294524  | 4.141684 | -1.700391 |
| N | 5.035597  | 3.646561 | -0.691011 |
| C | 6.479282  | 3.861043 | -0.632436 |
| C | 7.246094  | 2.555765 | -0.909600 |

|   |           |           |           |
|---|-----------|-----------|-----------|
| C | 6.438163  | 1.293307  | -0.537813 |
| C | 5.584238  | 0.726410  | -1.677742 |
| C | 4.912544  | -0.507156 | -1.545416 |
| N | 4.988490  | -1.230837 | -0.417692 |
| C | 4.342930  | -2.404142 | -0.388865 |
| C | 3.563003  | -2.900124 | -1.448894 |
| O | 2.918318  | -4.099266 | -1.284592 |
| C | 2.031525  | -4.571112 | -2.310106 |
| C | 1.419074  | -5.901455 | -1.879921 |
| N | 0.873610  | -5.950302 | -0.665021 |
| C | 0.247843  | -7.137385 | -0.113918 |
| C | -1.248685 | -7.112774 | -0.420972 |
| O | -1.823566 | -5.937466 | 0.160601  |
| C | -3.233794 | -5.833379 | -0.065917 |
| C | -3.839979 | -4.926916 | 1.007230  |
| O | -3.521432 | -5.471400 | 2.294692  |
| C | -3.726539 | -4.554476 | 3.376655  |
| C | -2.558454 | -3.582512 | 3.543502  |
| N | -1.501446 | -3.750074 | 2.746107  |
| C | -0.320437 | -2.903740 | 2.776561  |
| C | 0.831575  | -3.602621 | 3.547684  |
| C | 0.424800  | -3.787442 | 5.020560  |
| C | 2.092118  | -2.722450 | 3.526855  |
| C | 1.196613  | -4.992412 | 2.996304  |
| C | 0.020290  | -2.562228 | 1.314768  |
| N | -0.011300 | -1.289843 | 0.884066  |
| C | -0.110299 | -0.110671 | 1.746089  |
| C | -1.542549 | 0.161791  | 2.207652  |
| N | -2.498634 | -0.589276 | 1.656703  |
| C | -3.892349 | -0.542691 | 2.061268  |
| C | -4.553170 | 0.712339  | 1.526635  |
| C | -4.713169 | 1.844195  | 2.345321  |
| C | -5.332311 | 3.006279  | 1.853302  |
| C | -5.791631 | 3.069199  | 0.522831  |
| C | -6.440820 | 4.287900  | -0.023019 |
| C | -6.032128 | 5.603048  | 0.223976  |
| C | -4.847660 | 6.018260  | 1.072551  |
| N | -6.831281 | 6.536886  | -0.418507 |
| C | -7.747149 | 5.941816  | -1.094892 |
| S | -7.795428 | 4.217279  | -1.065459 |
| C | -5.635251 | 1.930769  | -0.292927 |
| C | -5.019631 | 0.767341  | 0.201444  |
| O | -1.767959 | 1.026851  | 3.048260  |
| C | 0.413657  | 1.058838  | 0.910199  |
| C | 1.411433  | 0.366618  | -0.007129 |
| O | 2.548012  | 0.055290  | 0.775555  |
| C | 0.635554  | -0.901177 | -0.356904 |
| O | 0.273834  | -3.473382 | 0.529173  |
| O | -2.623385 | -2.688426 | 4.382230  |
| O | 1.439658  | -6.872125 | -2.634873 |

|   |           |           |           |
|---|-----------|-----------|-----------|
| C | 3.482924  | -2.119667 | -2.618578 |
| C | 4.174570  | -0.899667 | -2.680248 |
| N | 4.103808  | -0.174432 | -3.797114 |
| C | 4.800241  | 0.968458  | -3.815927 |
| N | 5.535279  | 1.442496  | -2.805668 |
| C | 5.592786  | 1.676706  | 0.687279  |
| C | 4.515783  | 2.694981  | 0.290117  |
| O | 4.810030  | 4.773952  | -2.619796 |
| C | 2.235257  | 3.453900  | -2.941059 |
| C | 0.846029  | 3.261032  | -3.025912 |
| H | 0.009561  | 4.295466  | 0.121238  |
| H | 2.424812  | 4.615802  | 0.243083  |
| H | 6.722191  | 4.206337  | 0.373509  |
| H | 6.824190  | 4.629322  | -1.325626 |
| H | 8.145955  | 2.578919  | -0.293445 |
| H | 7.578982  | 2.524999  | -1.947439 |
| H | 7.148898  | 0.518441  | -0.247131 |
| H | 4.409935  | -3.000227 | 0.512478  |
| H | 2.581345  | -4.730155 | -3.238946 |
| H | 1.222875  | -3.857796 | -2.474461 |
| H | 0.810576  | -5.087670 | -0.130531 |
| H | 0.395227  | -7.149649 | 0.965831  |
| H | 0.689586  | -8.042867 | -0.532852 |
| H | -1.705790 | -8.005990 | 0.007368  |
| H | -1.402820 | -7.112291 | -1.501266 |
| H | -3.708752 | -6.821832 | 0.004605  |
| H | -3.420240 | -5.412523 | -1.063241 |
| H | -4.930508 | -4.884766 | 0.882868  |
| H | -3.428219 | -3.914997 | 0.892020  |
| H | -3.815928 | -5.129678 | 4.298318  |
| H | -4.649919 | -3.992407 | 3.230492  |
| H | -1.523750 | -4.497495 | 2.061702  |
| H | -0.549146 | -1.999713 | 3.332744  |
| H | 1.263653  | -4.178896 | 5.596833  |
| H | 0.122274  | -2.832569 | 5.451973  |
| H | -0.403796 | -4.490373 | 5.104535  |
| H | 2.444699  | -2.578310 | 2.505238  |
| H | 1.877219  | -1.749011 | 3.968086  |
| H | 2.888612  | -3.196254 | 4.101322  |
| H | 0.315499  | -5.632116 | 2.952195  |
| H | 1.634514  | -4.913974 | 2.002722  |
| H | 1.931832  | -5.464893 | 3.648061  |
| H | 0.545481  | -0.218203 | 2.610883  |
| H | -2.206469 | -1.270185 | 0.971255  |
| H | -3.959368 | -0.565075 | 3.150378  |
| H | -4.406456 | -1.421260 | 1.671350  |
| H | -4.349113 | 1.820101  | 3.363099  |
| H | -5.454793 | 3.849186  | 2.516643  |
| H | -5.168046 | 6.157879  | 2.104845  |
| H | -4.056197 | 5.272337  | 1.029839  |

|   |           |           |           |
|---|-----------|-----------|-----------|
| H | -4.452770 | 6.962666  | 0.697641  |
| H | -8.462936 | 6.516866  | -1.664053 |
| H | -5.980328 | 1.948705  | -1.317094 |
| H | -4.902278 | -0.091440 | -0.442799 |
| H | 0.866611  | 1.836306  | 1.526380  |
| H | -0.394384 | 1.475608  | 0.309770  |
| H | 1.667254  | 0.961867  | -0.885562 |
| H | 3.170620  | -0.469034 | 0.260224  |
| H | -0.126935 | -0.676219 | -1.104227 |
| H | 1.306130  | -1.662735 | -0.748578 |
| H | 2.913743  | -2.432424 | -3.479873 |
| H | 4.773615  | 1.567255  | -4.716868 |
| H | 6.245879  | 2.112998  | 1.444164  |
| H | 5.118268  | 0.804794  | 1.134892  |
| H | 3.685779  | 2.135028  | -0.133575 |
| H | 4.172499  | 3.218699  | 1.182898  |
| H | 2.864940  | 3.248489  | -3.794406 |
| H | 0.419526  | 2.898135  | -3.951343 |

conformer\_3

|   |           |           |           |
|---|-----------|-----------|-----------|
| F | -3.467394 | 6.284528  | 3.422430  |
| C | -3.295379 | 5.338483  | 2.427634  |
| F | -2.368164 | 4.419044  | 2.897904  |
| F | -4.526025 | 4.732854  | 2.224904  |
| O | -2.829963 | 6.037797  | 1.256683  |
| C | -2.573806 | 5.404280  | 0.061098  |
| C | -2.690578 | 4.011441  | -0.152320 |
| C | -2.406451 | 3.454013  | -1.411336 |
| C | -1.990265 | 4.258980  | -2.487931 |
| C | -1.696415 | 3.641580  | -3.806686 |
| N | -0.607350 | 3.962523  | -4.530316 |
| C | -0.315527 | 3.288418  | -5.786599 |
| C | 0.611751  | 2.103036  | -5.500722 |
| C | 1.614708  | 2.404855  | -4.362959 |
| C | 1.191420  | 1.793293  | -3.023848 |
| C | 1.071969  | 0.397109  | -2.860742 |
| N | 1.336223  | -0.454916 | -3.864331 |
| C | 1.199984  | -1.764136 | -3.613216 |
| C | 0.788591  | -2.294773 | -2.375457 |
| O | 0.652005  | -3.657049 | -2.245442 |
| C | -0.075082 | -4.201225 | -1.127057 |
| C | -1.539320 | -3.745014 | -1.147790 |
| N | -2.002886 | -3.110812 | -0.069088 |
| C | -3.320235 | -2.499231 | 0.003008  |
| C | -4.376820 | -3.555879 | 0.329393  |
| O | -4.011948 | -4.223351 | 1.542564  |
| C | -4.934255 | -5.256300 | 1.908008  |
| C | -4.483275 | -5.887323 | 3.227898  |
| O | -3.174636 | -6.453614 | 3.065268  |
| C | -2.523066 | -6.721747 | 4.313744  |

|   |           |           |           |
|---|-----------|-----------|-----------|
| C | -1.981476 | -5.430068 | 4.925777  |
| N | -1.247394 | -4.659170 | 4.123812  |
| C | -0.550807 | -3.448593 | 4.528635  |
| C | 0.888226  | -3.789886 | 5.017174  |
| C | 1.624977  | -2.519286 | 5.472937  |
| C | 1.738503  | -4.474850 | 3.931508  |
| C | 0.855105  | -4.732129 | 6.233393  |
| C | -0.547052 | -2.511213 | 3.307695  |
| N | -0.816711 | -1.206774 | 3.453932  |
| C | -0.601288 | -0.235148 | 2.392155  |
| C | 0.902001  | 0.071562  | 2.302216  |
| N | 1.696462  | -0.947406 | 1.968271  |
| C | 3.144796  | -0.876098 | 1.879909  |
| C | 3.562678  | -0.496637 | 0.473328  |
| C | 3.624055  | 0.851788  | 0.081861  |
| C | 4.030855  | 1.206880  | -1.216227 |
| C | 4.405518  | 0.221149  | -2.151815 |
| C | 4.864947  | 0.570571  | -3.522095 |
| C | 5.655709  | 1.676234  | -3.857077 |
| C | 6.229296  | 2.685123  | -2.883842 |
| N | 5.909149  | 1.758373  | -5.218212 |
| C | 5.367699  | 0.766147  | -5.828040 |
| S | 4.489134  | -0.384948 | -4.891801 |
| C | 4.318370  | -1.130554 | -1.762481 |
| C | 3.899371  | -1.485193 | -0.467782 |
| O | 1.339989  | 1.189279  | 2.576877  |
| C | -1.427296 | 0.982517  | 2.811527  |
| C | -1.290365 | 0.960313  | 4.333943  |
| O | -2.365535 | 1.633729  | 4.958413  |
| C | -1.276185 | -0.537836 | 4.662499  |
| O | -0.287041 | -2.969115 | 2.191990  |
| O | -2.235556 | -5.135178 | 6.093349  |
| O | -2.235355 | -3.932651 | -2.147480 |
| C | 0.529295  | -1.381502 | -1.336724 |
| C | 0.661122  | -0.006449 | -1.575344 |
| N | 0.392291  | 0.847024  | -0.585744 |
| C | 0.576047  | 2.146230  | -0.845242 |
| N | 0.970635  | 2.649902  | -2.019713 |
| C | 1.842052  | 3.930526  | -4.301787 |
| C | 0.543924  | 4.716218  | -4.028965 |
| O | -2.488576 | 2.794439  | -4.220296 |
| C | -1.889172 | 5.647325  | -2.281581 |
| C | -2.171123 | 6.207582  | -1.023340 |
| H | -3.000900 | 3.328820  | 0.625448  |
| H | -2.503742 | 2.386475  | -1.558008 |
| H | 0.185967  | 3.988624  | -6.456465 |
| H | -1.214559 | 2.940629  | -6.297815 |
| H | 1.159853  | 1.873199  | -6.415482 |
| H | -0.008664 | 1.241906  | -5.254337 |
| H | 2.565377  | 1.944180  | -4.629250 |

|   |           |           |           |
|---|-----------|-----------|-----------|
| H | 1.408637  | -2.458167 | -4.417519 |
| H | 0.415975  | -3.948954 | -0.187171 |
| H | -0.065418 | -5.287323 | -1.219712 |
| H | -1.406237 | -3.038757 | 0.749319  |
| H | -3.569345 | -2.013539 | -0.941820 |
| H | -3.314726 | -1.743754 | 0.789486  |
| H | -4.440857 | -4.273666 | -0.489872 |
| H | -5.343910 | -3.064542 | 0.447046  |
| H | -4.961669 | -6.026927 | 1.125109  |
| H | -5.939094 | -4.830931 | 2.036247  |
| H | -5.188187 | -6.678660 | 3.516890  |
| H | -4.480226 | -5.108411 | 4.002646  |
| H | -1.684139 | -7.394620 | 4.134337  |
| H | -3.212450 | -7.206744 | 5.006877  |
| H | -1.149220 | -4.928565 | 3.154179  |
| H | -1.097745 | -2.989903 | 5.351403  |
| H | 1.096676  | -2.060277 | 6.308387  |
| H | 2.633968  | -2.770073 | 5.801807  |
| H | 1.704308  | -1.799574 | 4.659602  |
| H | 1.237230  | -5.366055 | 3.553873  |
| H | 1.930214  | -3.796065 | 3.101612  |
| H | 2.700322  | -4.772992 | 4.349581  |
| H | 0.495297  | -5.720484 | 5.949516  |
| H | 1.857806  | -4.848553 | 6.645671  |
| H | 0.208097  | -4.321523 | 7.009056  |
| H | -0.963476 | -0.598421 | 1.429937  |
| H | 1.250299  | -1.840337 | 1.792310  |
| H | 3.560495  | -1.850317 | 2.138884  |
| H | 3.537688  | -0.145529 | 2.588679  |
| H | 3.350046  | 1.623752  | 0.787173  |
| H | 4.040330  | 2.253227  | -1.481854 |
| H | 6.489834  | 2.204911  | -1.940632 |
| H | 7.134769  | 3.117139  | -3.310720 |
| H | 5.510178  | 3.486057  | -2.713163 |
| H | 5.468424  | 0.664519  | -6.899340 |
| H | 4.584668  | -1.916105 | -2.456260 |
| H | 3.846718  | -2.529064 | -0.191994 |
| H | -2.468146 | 0.812263  | 2.533948  |
| H | -1.073226 | 1.911715  | 2.364191  |
| H | -0.338398 | 1.405096  | 4.631230  |
| H | -2.299268 | 2.571027  | 4.740120  |
| H | -0.622504 | -0.715997 | 5.515857  |
| H | -2.288164 | -0.874870 | 4.893950  |
| H | 0.239727  | -1.703716 | -0.352635 |
| H | 0.388741  | 2.855801  | -0.049074 |
| H | 2.246378  | 4.247556  | -5.264200 |
| H | 2.585290  | 4.173056  | -3.540346 |
| H | 0.487015  | 4.911234  | -2.960466 |
| H | 0.597557  | 5.680155  | -4.536644 |
| H | -1.598316 | 6.292062  | -3.099668 |

H -2.080210 7.278487 -0.893647

conformer\_4

F -0.140288 13.347796 -3.244025  
C -0.615437 14.114317 -2.238389  
F 0.353082 14.300501 -1.315579  
F -0.943202 15.321827 -2.751354  
O -1.772778 13.537751 -1.657840  
C -1.653844 12.303909 -1.084778  
C -2.842140 11.808916 -0.532091  
C -2.874941 10.558671 0.090008  
C -1.713987 9.785896 0.146599  
C -1.750964 8.479697 0.844876  
N -1.215779 7.353948 0.203992  
C -1.311266 7.190095 -1.249434  
C -0.286767 6.194471 -1.790953  
C -0.234953 4.865607 -1.013911  
C -1.356283 3.888886 -1.359522  
C -1.153077 2.520009 -1.174559  
N 0.008858 1.990256 -0.710476  
C 0.075200 0.646896 -0.575376  
C -0.963976 -0.215576 -0.880667  
O -0.720763 -1.541795 -0.683845  
C -1.753135 -2.452754 -1.048395  
C -1.271799 -3.889903 -0.837467  
N -2.283116 -4.828497 -0.883628  
C -2.034480 -6.226639 -0.566678  
C -2.039497 -6.480906 0.942300  
O -3.372687 -6.300179 1.442193  
C -3.470517 -6.610221 2.834525  
C -3.177806 -5.395679 3.714431  
O -3.201712 -5.796968 5.088391  
C -2.908024 -4.716769 5.973766  
C -1.413844 -4.387437 6.053430  
N -0.602864 -5.502783 5.964717  
C 0.828456 -5.355390 5.676829  
C 1.674613 -6.528308 6.263281  
C 3.170270 -6.314272 5.959149  
C 1.262314 -7.907730 5.712978  
C 1.508679 -6.554149 7.799334  
C 0.899827 -5.249293 4.130584  
N 1.642757 -4.236503 3.573058  
C 1.645983 -4.025963 2.126810  
C 2.629500 -4.971572 1.408355  
N 2.461491 -5.015381 0.039904  
C 3.219741 -5.946779 -0.757700  
C 3.060163 -5.664681 -2.227775  
C 2.016547 -6.250812 -2.956144  
C 1.863349 -5.982101 -4.319642  
C 2.745640 -5.116188 -4.979640

|   |           |           |           |
|---|-----------|-----------|-----------|
| C | 2.588306  | -4.826321 | -6.405186 |
| C | 2.381936  | -3.619760 | -7.062184 |
| C | 2.235376  | -2.275321 | -6.441614 |
| N | 2.300851  | -3.710344 | -8.446194 |
| C | 2.442468  | -4.963056 | -8.815844 |
| S | 2.677972  | -6.099606 | -7.559233 |
| C | 3.778387  | -4.516637 | -4.247047 |
| C | 3.932518  | -4.785694 | -2.883305 |
| O | 3.531495  | -5.574168 | 1.988497  |
| C | 2.082105  | -2.572726 | 1.953678  |
| C | 3.006235  | -2.350459 | 3.148967  |
| O | 3.110200  | -0.973133 | 3.465677  |
| C | 2.315889  | -3.144023 | 4.259596  |
| O | 0.263913  | -6.037789 | 3.419580  |
| O | -0.991957 | -3.243848 | 6.194914  |
| O | -0.094190 | -4.192397 | -0.649705 |
| C | -2.142720 | 0.354740  | -1.350843 |
| C | -2.264936 | 1.730389  | -1.508276 |
| N | -3.427803 | 2.223403  | -1.962879 |
| C | -3.502591 | 3.551644  | -2.092236 |
| N | -2.523652 | 4.417015  | -1.809406 |
| C | -0.162344 | 5.140550  | 0.495197  |
| C | -1.241904 | 6.108532  | 0.964706  |
| O | -2.226564 | 8.458141  | 1.978686  |
| C | -0.516786 | 10.280523 | -0.381887 |
| C | -0.489690 | 11.534745 | -1.003337 |
| H | -3.752121 | 12.404248 | -0.578382 |
| H | -3.799777 | 10.192536 | 0.529754  |
| H | -1.175817 | 8.143918  | -1.764239 |
| H | -2.337692 | 6.879557  | -1.470618 |
| H | 0.703613  | 6.664169  | -1.716695 |
| H | -0.467407 | 6.017444  | -2.858051 |
| H | 0.704653  | 4.382910  | -1.317183 |
| H | 1.022546  | 0.265682  | -0.202959 |
| H | -2.003823 | -2.347271 | -2.110477 |
| H | -2.635053 | -2.288880 | -0.418171 |
| H | -3.245713 | -4.520851 | -0.807164 |
| H | -1.068571 | -6.518883 | -0.991428 |
| H | -2.827376 | -6.802192 | -1.054896 |
| H | -1.361566 | -5.789236 | 1.448619  |
| H | -1.719295 | -7.511390 | 1.131663  |
| H | -2.827862 | -7.458566 | 3.100942  |
| H | -4.498296 | -6.940541 | 3.023925  |
| H | -3.937279 | -4.624793 | 3.537543  |
| H | -2.205818 | -4.962002 | 3.460702  |
| H | -3.231574 | -5.010455 | 6.977687  |
| H | -3.467002 | -3.820610 | 5.682853  |
| H | -1.060728 | -6.304984 | 5.537089  |
| H | 1.159498  | -4.417568 | 6.132296  |
| H | 3.527054  | -5.366601 | 6.376302  |



|   |           |           |           |
|---|-----------|-----------|-----------|
| H | 3.780329  | -7.113180 | 6.396710  |
| H | 3.367218  | -6.308764 | 4.882241  |
| H | 0.205782  | -8.123051 | 5.902104  |
| H | 1.438483  | -7.983963 | 4.635393  |
| H | 1.843921  | -8.706918 | 6.187984  |
| H | 0.474998  | -6.770703 | 8.090221  |
| H | 2.143337  | -7.323899 | 8.253542  |
| H | 1.787935  | -5.591515 | 8.242450  |
| H | 0.638608  | -4.193950 | 1.736170  |
| H | 1.560144  | -4.702703 | -0.333701 |
| H | 2.873629  | -6.960044 | -0.520377 |
| H | 4.276400  | -5.899602 | -0.468120 |
| H | 1.313285  | -6.919839 | -2.464579 |
| H | 1.042430  | -6.449290 | -4.859578 |
| H | 3.210658  | -1.894452 | -6.124108 |
| H | 1.806833  | -1.562992 | -7.153798 |
| H | 1.573248  | -2.316687 | -5.570919 |
| H | 2.412869  | -5.266059 | -9.854337 |
| H | 4.478584  | -3.840822 | -4.733507 |
| H | 4.740303  | -4.305943 | -2.333833 |
| H | 1.216030  | -1.901417 | 2.018641  |
| H | 2.584551  | -2.361230 | 1.004460  |
| H | 4.006412  | -2.754588 | 2.953694  |
| H | 3.549436  | -0.534343 | 2.715523  |
| H | 3.030645  | -3.527080 | 4.991635  |
| H | 1.568289  | -2.541240 | 4.787154  |
| H | -3.004641 | -0.252636 | -1.607950 |
| H | -4.438198 | 3.962548  | -2.456750 |
| H | 0.818095  | 5.583122  | 0.717100  |
| H | -0.224881 | 4.212920  | 1.075757  |
| H | -2.242696 | 5.671279  | 0.867149  |
| H | -1.085483 | 6.322447  | 2.028306  |
| H | 0.397864  | 9.696521  | -0.305032 |
| H | 0.461249  | 11.876127 | -1.403301 |

conformer\_5

|   |           |           |           |
|---|-----------|-----------|-----------|
| F | 1.785164  | 10.627747 | 1.181429  |
| C | 0.505795  | 11.144477 | 1.284198  |
| F | 0.025817  | 11.036649 | 2.577185  |
| F | 0.592666  | 12.491297 | 0.998447  |
| O | -0.398651 | 10.573089 | 0.310547  |
| C | -0.725717 | 9.236604  | 0.279711  |
| C | -0.240356 | 8.260285  | 1.177389  |
| C | -0.637156 | 6.918075  | 1.055520  |
| C | -1.515769 | 6.522050  | 0.036299  |
| C | -1.936299 | 5.095073  | -0.070191 |
| N | -1.872520 | 4.439718  | -1.246577 |
| C | -2.418476 | 3.094606  | -1.382022 |
| C | -1.273218 | 2.090904  | -1.280539 |
| C | -0.193849 | 2.357793  | -2.343503 |

|   |           |           |           |
|---|-----------|-----------|-----------|
| C | 0.978829  | 1.394664  | -2.159765 |
| C | 0.882316  | 0.024244  | -2.470657 |
| N | -0.258118 | -0.485816 | -2.951650 |
| C | -0.279449 | -1.796421 | -3.212925 |
| C | 0.794064  | -2.657160 | -3.025473 |
| O | 0.610888  | -3.984322 | -3.316790 |
| C | 1.747304  | -4.871554 | -3.449839 |
| C | 1.159939  | -6.269999 | -3.575469 |
| N | -0.153959 | -6.316284 | -3.392242 |
| C | -0.977563 | -7.495100 | -3.272971 |
| C | -1.953076 | -7.214742 | -2.136531 |
| O | -2.349785 | -5.837312 | -2.209891 |
| C | -3.029567 | -5.401894 | -1.028236 |
| C | -3.795729 | -4.104122 | -1.301411 |
| O | -2.892174 | -3.037709 | -1.628488 |
| C | -3.556225 | -1.764697 | -1.705028 |
| C | -3.444444 | -1.066234 | -0.354483 |
| N | -2.364111 | -1.379608 | 0.355832  |
| C | -2.016884 | -0.890255 | 1.676292  |
| C | -2.047211 | -2.054287 | 2.710650  |
| C | -3.480105 | -2.601522 | 2.830451  |
| C | -1.643292 | -1.582500 | 4.117017  |
| C | -1.129000 | -3.231212 | 2.340116  |
| C | -0.633328 | -0.254410 | 1.475074  |
| N | -0.299636 | 0.903830  | 2.068396  |
| C | 1.002817  | 1.540218  | 1.911133  |
| C | 2.027863  | 0.853776  | 2.821733  |
| N | 2.320472  | -0.398567 | 2.487058  |
| C | 3.224013  | -1.280495 | 3.189418  |
| C | 2.996361  | -2.637302 | 2.563603  |
| C | 2.640185  | -3.744998 | 3.349421  |
| C | 2.381483  | -4.988199 | 2.746256  |
| C | 2.460537  | -5.130753 | 1.349054  |
| C | 2.177734  | -6.419277 | 0.672594  |
| C | 1.042631  | -7.217608 | 0.864604  |
| C | -0.135758 | -6.963169 | 1.784232  |
| N | 1.069370  | -8.369332 | 0.040375  |
| C | 2.137380  | -8.373674 | -0.674450 |
| S | 3.248998  | -7.067439 | -0.491616 |
| C | 2.845932  | -4.026936 | 0.573208  |
| C | 3.114105  | -2.788567 | 1.173569  |
| O | 2.526028  | 1.419082  | 3.791334  |
| C | 0.779452  | 3.017784  | 2.242390  |
| C | -0.319268 | 2.955747  | 3.297083  |
| O | -1.071580 | 4.168278  | 3.331725  |
| C | -1.176744 | 1.777062  | 2.833968  |
| O | 0.160251  | -0.827037 | 0.724385  |
| O | -4.307285 | -0.281579 | 0.027852  |
| O | 1.863162  | -7.251950 | -3.797206 |
| C | 1.980284  | -2.107160 | -2.546284 |

|   |           |           |           |
|---|-----------|-----------|-----------|
| C | 2.021222  | -0.748655 | -2.257999 |
| N | 3.148666  | -0.214048 | -1.789749 |
| C | 3.180784  | 1.097848  | -1.542285 |
| N | 2.131386  | 1.905554  | -1.716371 |
| C | 0.242007  | 3.834093  | -2.258207 |
| C | -0.968639 | 4.764097  | -2.350843 |
| O | -2.297970 | 4.530354  | 0.961092  |
| C | -2.011767 | 7.490806  | -0.850580 |
| C | -1.615120 | 8.832657  | -0.729872 |
| H | 0.439113  | 8.504672  | 1.979135  |
| H | -0.263121 | 6.182661  | 1.753240  |
| H | -2.896054 | 2.988842  | -2.356450 |
| H | -3.167317 | 2.865271  | -0.623840 |
| H | -1.687520 | 1.091204  | -1.384255 |
| H | -0.825606 | 2.185595  | -0.296521 |
| H | -0.630059 | 2.199467  | -3.330203 |
| H | -1.193388 | -2.225212 | -3.598419 |
| H | 2.378323  | -4.857468 | -2.563995 |
| H | 2.329634  | -4.622149 | -4.337065 |
| H | -0.604876 | -5.431344 | -3.186572 |
| H | -1.528957 | -7.636837 | -4.202331 |
| H | -0.391909 | -8.386823 | -3.047314 |
| H | -1.438674 | -7.390648 | -1.192779 |
| H | -2.815396 | -7.877587 | -2.211537 |
| H | -2.300119 | -5.235121 | -0.225086 |
| H | -3.750203 | -6.166850 | -0.709417 |
| H | -4.369050 | -3.847711 | -0.400905 |
| H | -4.489943 | -4.270523 | -2.136001 |
| H | -4.604490 | -1.873606 | -1.985208 |
| H | -3.058767 | -1.146420 | -2.450822 |
| H | -1.672209 | -1.959069 | -0.099438 |
| H | -2.745965 | -0.144755 | 1.984951  |
| H | -4.172280 | -1.790112 | 3.056114  |
| H | -3.536629 | -3.341289 | 3.629119  |
| H | -3.787788 | -3.082015 | 1.902730  |
| H | -0.623968 | -1.196018 | 4.122028  |
| H | -2.326845 | -0.805104 | 4.456082  |
| H | -1.692493 | -2.413708 | 4.820578  |
| H | -0.084191 | -2.926514 | 2.361384  |
| H | -1.260359 | -4.034830 | 3.064111  |
| H | -1.364093 | -3.620056 | 1.350479  |
| H | 1.353110  | 1.471164  | 0.883736  |
| H | 1.780159  | -0.784806 | 1.715429  |
| H | 2.996344  | -1.299519 | 4.255615  |
| H | 4.252345  | -0.959428 | 3.023049  |
| H | 2.555218  | -3.642161 | 4.421447  |
| H | 2.114592  | -5.832579 | 3.365164  |
| H | -0.074643 | -5.995525 | 2.272892  |
| H | -1.055549 | -6.996646 | 1.201851  |
| H | -0.168839 | -7.744303 | 2.543272  |

|   |           |           |           |
|---|-----------|-----------|-----------|
| H | 2.320926  | -9.173793 | -1.377339 |
| H | 2.938650  | -4.129582 | -0.494844 |
| H | 3.406111  | -1.949606 | 0.557924  |
| H | 0.391940  | 3.519775  | 1.356065  |
| H | 1.673806  | 3.534300  | 2.590749  |
| H | 0.111536  | 2.740246  | 4.274929  |
| H | -1.580120 | 4.243969  | 2.501086  |
| H | -1.602111 | 1.280766  | 3.702941  |
| H | -1.972503 | 2.137997  | 2.182722  |
| H | 2.868536  | -2.693205 | -2.381715 |
| H | 4.100916  | 1.532891  | -1.176021 |
| H | 0.928087  | 4.062763  | -3.074249 |
| H | 0.729797  | 4.040317  | -1.304141 |
| H | -0.598847 | 5.786354  | -2.343877 |
| H | -1.475555 | 4.603240  | -3.302729 |
| H | -2.704759 | 7.199712  | -1.626383 |
| H | -2.001228 | 9.568101  | -1.420371 |

conformer\_6

|   |           |           |           |
|---|-----------|-----------|-----------|
| F | 0.407378  | 7.992557  | 2.196007  |
| C | 0.226381  | 6.706891  | 2.673950  |
| F | 1.295897  | 6.298934  | 3.453259  |
| F | -0.879741 | 6.736627  | 3.499951  |
| O | -0.084401 | 5.767219  | 1.620363  |
| C | 0.869652  | 5.299436  | 0.747153  |
| C | 2.100717  | 5.934744  | 0.478548  |
| C | 3.012857  | 5.368015  | -0.428435 |
| C | 2.720814  | 4.160026  | -1.079713 |
| C | 3.730485  | 3.551464  | -2.001853 |
| N | 3.393056  | 3.102737  | -3.230215 |
| C | 2.151197  | 3.389197  | -3.955207 |
| C | 1.392158  | 2.083798  | -4.199320 |
| C | 2.282890  | 1.084508  | -4.948885 |
| C | 1.555319  | -0.217279 | -5.271152 |
| C | 1.085433  | -1.144416 | -4.312502 |
| N | 1.270852  | -0.948116 | -2.999109 |
| C | 0.780597  | -1.862849 | -2.152490 |
| C | 0.088327  | -3.010584 | -2.554035 |
| O | -0.444901 | -3.956592 | -1.707976 |
| C | -0.389266 | -3.789805 | -0.272967 |
| C | 0.969234  | -4.177036 | 0.308167  |
| N | 1.358519  | -3.512487 | 1.391578  |
| C | 2.625074  | -3.704920 | 2.071925  |
| C | 3.701050  | -2.879193 | 1.370890  |
| O | 3.155441  | -1.591765 | 1.072678  |
| C | 4.143855  | -0.658769 | 0.631814  |
| C | 3.444589  | 0.638161  | 0.222045  |
| O | 2.390600  | 0.944458  | 1.142947  |
| C | 2.819824  | 1.705584  | 2.284790  |
| C | 1.657254  | 1.669110  | 3.269530  |

|   |           |           |           |
|---|-----------|-----------|-----------|
| N | 0.661182  | 0.872415  | 2.895447  |
| C | -0.580298 | 0.565212  | 3.578347  |
| C | -1.762166 | 1.382211  | 2.969938  |
| C | -1.911385 | 1.182059  | 1.451790  |
| C | -1.562890 | 2.885528  | 3.229766  |
| C | -3.108228 | 1.022550  | 3.618683  |
| C | -0.684675 | -0.958522 | 3.379145  |
| N | -1.166553 | -1.768389 | 4.337101  |
| C | -1.149544 | -3.224148 | 4.199144  |
| C | -2.365272 | -3.726497 | 3.410278  |
| N | -3.372868 | -2.864964 | 3.252611  |
| C | -4.588173 | -3.109671 | 2.495164  |
| C | -4.361392 | -2.654834 | 1.069505  |
| C | -4.586723 | -1.318789 | 0.705289  |
| C | -4.323415 | -0.887053 | -0.605407 |
| C | -3.818345 | -1.785041 | -1.562755 |
| C | -3.481006 | -1.344152 | -2.937270 |
| C | -2.694778 | -0.232437 | -3.260716 |
| C | -1.988872 | 0.709204  | -2.307225 |
| N | -2.555860 | -0.077359 | -4.662150 |
| C | -3.182916 | -1.020624 | -5.270321 |
| S | -4.013532 | -2.197351 | -4.319402 |
| C | -3.639810 | -3.130836 | -1.206856 |
| C | -3.907511 | -3.562904 | 0.101986  |
| O | -2.377625 | -4.862968 | 2.938460  |
| C | -1.141402 | -3.773966 | 5.626012  |
| C | -1.890990 | -2.703708 | 6.411612  |
| O | -1.520183 | -2.725707 | 7.792647  |
| C | -1.447823 | -1.410541 | 5.721640  |
| O | -0.262654 | -1.427146 | 2.319990  |
| O | 1.658716  | 2.332900  | 4.305672  |
| O | 1.659193  | -5.041409 | -0.233272 |
| C | -0.081057 | -3.200190 | -3.917617 |
| C | 0.419239  | -2.261615 | -4.810047 |
| N | 0.245741  | -2.447981 | -6.118970 |
| C | 0.724543  | -1.535660 | -6.969362 |
| N | 1.369803  | -0.434302 | -6.575116 |
| C | 3.633622  | 0.894875  | -4.241065 |
| C | 4.296499  | 2.256020  | -4.012066 |
| O | 4.888250  | 3.482144  | -1.591457 |
| C | 1.500029  | 3.522308  | -0.803163 |
| C | 0.578845  | 4.098900  | 0.082928  |
| H | 2.379320  | 6.864191  | 0.950598  |
| H | 3.954501  | 5.861897  | -0.621733 |
| H | 2.401304  | 3.829668  | -4.920716 |
| H | 1.496773  | 4.095099  | -3.448192 |
| H | 0.495413  | 2.286814  | -4.784926 |
| H | 1.103507  | 1.673656  | -3.237870 |
| H | 2.511531  | 1.547486  | -5.909751 |
| H | 0.948192  | -1.666760 | -1.103919 |

|   |           |           |           |
|---|-----------|-----------|-----------|
| H | -1.125304 | -4.463050 | 0.165088  |
| H | -0.664918 | -2.774124 | 0.010640  |
| H | 0.767925  | -2.747894 | 1.723617  |
| H | 2.909766  | -4.757089 | 2.099419  |
| H | 2.516614  | -3.340540 | 3.093740  |
| H | 3.990945  | -3.370399 | 0.441596  |
| H | 4.569687  | -2.795791 | 2.024402  |
| H | 4.698395  | -1.058909 | -0.227472 |
| H | 4.842799  | -0.454418 | 1.453752  |
| H | 2.988000  | 0.490082  | -0.765368 |
| H | 4.172964  | 1.456356  | 0.163418  |
| H | 3.030093  | 2.735519  | 1.994363  |
| H | 3.698050  | 1.262216  | 2.753436  |
| H | 0.840718  | 0.336377  | 2.050547  |
| H | -0.474180 | 0.817253  | 4.631933  |
| H | -2.162007 | 0.147012  | 1.226576  |
| H | -2.712115 | 1.815235  | 1.069536  |
| H | -0.992594 | 1.440921  | 0.927349  |
| H | -1.433584 | 3.066559  | 4.296943  |
| H | -0.685432 | 3.253446  | 2.702485  |
| H | -2.426780 | 3.451101  | 2.880384  |
| H | -3.068421 | 1.223933  | 4.688599  |
| H | -3.907676 | 1.623009  | 3.184395  |
| H | -3.351432 | -0.026338 | 3.457686  |
| H | -0.241234 | -3.572134 | 3.707897  |
| H | -3.245547 | -1.946913 | 3.650284  |
| H | -5.394775 | -2.524694 | 2.937122  |
| H | -4.855761 | -4.166329 | 2.519026  |
| H | -4.949847 | -0.613068 | 1.438533  |
| H | -4.495393 | 0.147865  | -0.865064 |
| H | -1.969707 | 0.317497  | -1.294007 |
| H | -0.961589 | 0.831464  | -2.638659 |
| H | -2.484582 | 1.679469  | -2.317522 |
| H | -3.182356 | -1.068502 | -6.350401 |
| H | -3.267883 | -3.838340 | -1.934485 |
| H | -3.738857 | -4.595756 | 0.372036  |
| H | -0.110276 | -3.821309 | 5.978045  |
| H | -1.613112 | -4.753764 | 5.705658  |
| H | -2.966496 | -2.838589 | 6.292032  |
| H | -2.000300 | -2.009732 | 8.235424  |
| H | -2.234963 | -0.664536 | 5.806691  |
| H | -0.532424 | -1.047570 | 6.190555  |
| H | -0.607268 | -4.068558 | -4.281691 |
| H | 0.583205  | -1.691689 | -8.030941 |
| H | 4.283069  | 0.275560  | -4.859798 |
| H | 3.505697  | 0.417346  | -3.271232 |
| H | 5.252131  | 2.073726  | -3.522471 |
| H | 4.499328  | 2.726989  | -4.974417 |
| H | 1.267981  | 2.572177  | -1.254922 |
| H | -0.360016 | 3.601684  | 0.272275  |

conformer\_7

|   |           |           |           |
|---|-----------|-----------|-----------|
| F | 2.419333  | -0.277596 | 7.136049  |
| C | 2.855743  | -0.330111 | 5.827557  |
| F | 3.708767  | -1.415492 | 5.730709  |
| F | 1.731585  | -0.509719 | 5.041161  |
| O | 3.523912  | 0.927056  | 5.569150  |
| C | 4.076014  | 1.245523  | 4.348674  |
| C | 4.678872  | 2.510170  | 4.240240  |
| C | 5.266306  | 2.932094  | 3.036168  |
| C | 5.251686  | 2.094252  | 1.910992  |
| C | 5.875767  | 2.513125  | 0.624315  |
| N | 5.301103  | 3.465317  | -0.139930 |
| C | 4.025941  | 4.133796  | 0.129762  |
| C | 2.934042  | 3.430506  | -0.673561 |
| C | 3.302375  | 3.390716  | -2.169295 |
| C | 2.259471  | 2.653814  | -3.003504 |
| C | 1.929869  | 1.288248  | -2.852251 |
| N | 2.568950  | 0.514305  | -1.964346 |
| C | 2.159786  | -0.751615 | -1.837975 |
| C | 1.126277  | -1.320987 | -2.571236 |
| O | 0.796401  | -2.628754 | -2.315059 |
| C | -0.337520 | -3.230222 | -2.981927 |
| C | -0.588366 | -4.557064 | -2.275269 |
| N | 0.130363  | -4.724392 | -1.172526 |
| C | 0.131386  | -5.865374 | -0.286083 |
| C | 1.411495  | -5.766053 | 0.543169  |
| O | 1.687425  | -4.378833 | 0.799908  |
| C | 1.139374  | -3.905093 | 2.038078  |
| C | 0.925418  | -2.386804 | 1.948619  |
| O | 0.177264  | -2.049488 | 0.767239  |
| C | -1.247098 | -2.166176 | 0.924525  |
| C | -1.817370 | -0.857762 | 1.458909  |
| N | -1.105505 | 0.226196  | 1.166478  |
| C | -1.452227 | 1.606664  | 1.428910  |
| C | -0.651399 | 2.174074  | 2.640477  |
| C | -1.085134 | 1.465443  | 3.934733  |
| C | -0.939552 | 3.670430  | 2.845780  |
| C | 0.874335  | 2.009853  | 2.515750  |
| C | -1.112070 | 2.254427  | 0.080024  |
| N | -1.925664 | 3.133594  | -0.522046 |
| C | -3.206122 | 3.656808  | -0.050502 |
| C | -4.358304 | 2.781748  | -0.560137 |
| N | -4.031264 | 1.841005  | -1.449548 |
| C | -4.957774 | 0.972091  | -2.153786 |
| C | -4.762455 | -0.461758 | -1.712290 |
| C | -4.129439 | -1.385572 | -2.558014 |
| C | -3.986161 | -2.725010 | -2.162012 |
| C | -4.467481 | -3.155600 | -0.913953 |
| C | -4.310428 | -4.563018 | -0.477612 |

|   |           |           |           |
|---|-----------|-----------|-----------|
| C | -4.685324 | -5.689546 | -1.219017 |
| C | -5.375964 | -5.725724 | -2.568589 |
| N | -4.375700 | -6.891990 | -0.535370 |
| C | -3.847362 | -6.624368 | 0.605450  |
| S | -3.632517 | -4.968549 | 1.038291  |
| C | -5.079587 | -2.223898 | -0.060275 |
| C | -5.226751 | -0.884325 | -0.457673 |
| O | -5.507042 | 2.959356  | -0.157035 |
| C | -3.283812 | 5.066511  | -0.637420 |
| C | -2.572980 | 4.917617  | -1.981117 |
| O | -2.020567 | 6.164041  | -2.411775 |
| C | -1.477398 | 3.889997  | -1.681428 |
| O | -0.095926 | 1.867829  | -0.491064 |
| O | -2.852933 | -0.834630 | 2.121768  |
| O | -1.394956 | -5.381270 | -2.702528 |
| C | 0.492877  | -0.516012 | -3.516629 |
| C | 0.899501  | 0.806394  | -3.657010 |
| N | 0.290728  | 1.587196  | -4.551324 |
| C | 0.678610  | 2.861200  | -4.666520 |
| N | 1.631811  | 3.409438  | -3.907516 |
| C | 4.739968  | 2.902528  | -2.426226 |
| C | 5.717519  | 3.663118  | -1.526250 |
| O | 6.891597  | 1.917807  | 0.266583  |
| C | 4.655164  | 0.829251  | 2.009862  |
| C | 4.074009  | 0.403390  | 3.215150  |
| H | 4.692598  | 3.168248  | 5.097088  |
| H | 5.730842  | 3.905548  | 2.971917  |
| H | 4.083798  | 5.172974  | -0.194748 |
| H | 3.739165  | 4.147639  | 1.178605  |
| H | 1.990784  | 3.962251  | -0.546440 |
| H | 2.829375  | 2.429152  | -0.262194 |
| H | 3.282312  | 4.429297  | -2.501882 |
| H | 2.656798  | -1.377064 | -1.109690 |
| H | -0.120833 | -3.400275 | -4.036892 |
| H | -1.221272 | -2.603629 | -2.870038 |
| H | 0.765628  | -3.967801 | -0.934274 |
| H | 0.114712  | -6.802812 | -0.842490 |
| H | -0.739044 | -5.807662 | 0.366951  |
| H | 2.232939  | -6.158408 | -0.056218 |
| H | 1.331295  | -6.351381 | 1.460027  |
| H | 1.838988  | -4.127089 | 2.854619  |
| H | 0.180983  | -4.395567 | 2.252095  |
| H | 1.908083  | -1.903608 | 1.869130  |
| H | 0.427436  | -2.021910 | 2.856578  |
| H | -1.525532 | -2.985144 | 1.584864  |
| H | -1.676730 | -2.346327 | -0.060183 |
| H | -0.298934 | 0.106334  | 0.562379  |
| H | -2.518405 | 1.668839  | 1.636744  |
| H | -0.805112 | 0.413070  | 3.906729  |
| H | -0.601563 | 1.922259  | 4.798407  |



|   |           |           |           |
|---|-----------|-----------|-----------|
| H | -2.165701 | 1.541409  | 4.057307  |
| H | -0.630347 | 4.252251  | 1.977494  |
| H | -2.004315 | 3.822525  | 3.019081  |
| H | -0.393308 | 4.041014  | 3.713429  |
| H | 1.260520  | 2.605814  | 1.691229  |
| H | 1.355480  | 2.355087  | 3.430504  |
| H | 1.146630  | 0.965940  | 2.361253  |
| H | -3.265613 | 3.739780  | 1.032163  |
| H | -3.049260 | 1.765228  | -1.676636 |
| H | -4.761542 | 1.054577  | -3.222799 |
| H | -5.991483 | 1.261063  | -1.965037 |
| H | -3.761355 | -1.072612 | -3.524721 |
| H | -3.504971 | -3.426760 | -2.828162 |
| H | -5.692676 | -4.737897 | -2.898216 |
| H | -4.693900 | -6.148958 | -3.305894 |
| H | -6.257872 | -6.361606 | -2.493416 |
| H | -3.549483 | -7.423165 | 1.270322  |
| H | -5.443097 | -2.534950 | 0.909111  |
| H | -5.705236 | -0.175448 | 0.203364  |
| H | -2.710882 | 5.741624  | -0.000824 |
| H | -4.306977 | 5.427136  | -0.746327 |
| H | -3.259956 | 4.518315  | -2.728021 |
| H | -2.758955 | 6.755297  | -2.619218 |
| H | -1.329058 | 3.238611  | -2.542683 |
| H | -0.547174 | 4.405945  | -1.438771 |
| H | -0.307773 | -0.876945 | -4.141657 |
| H | 0.185645  | 3.488955  | -5.397619 |
| H | 4.998926  | 3.074697  | -3.470958 |
| H | 4.838245  | 1.840263  | -2.209033 |
| H | 6.731032  | 3.316119  | -1.724402 |
| H | 5.684113  | 4.723574  | -1.777867 |
| H | 4.646237  | 0.179350  | 1.146408  |
| H | 3.633117  | -0.580734 | 3.228299  |

conformer\_8

|   |           |           |           |
|---|-----------|-----------|-----------|
| F | 0.218153  | 7.245498  | -5.838008 |
| C | 0.887952  | 8.136186  | -5.104771 |
| F | 2.142905  | 7.733926  | -4.897193 |
| F | 0.937299  | 9.273251  | -5.795809 |
| O | 0.216549  | 8.418566  | -3.878121 |
| C | 0.017486  | 7.420347  | -2.945696 |
| C | 0.428965  | 6.088557  | -3.094506 |
| C | 0.177939  | 5.157900  | -2.089495 |
| C | -0.476109 | 5.543089  | -0.910946 |
| C | -0.790170 | 4.540968  | 0.179886  |
| N | 0.172226  | 3.675082  | 0.606007  |
| C | 1.616649  | 3.822260  | 0.330638  |
| C | 2.093050  | 2.511923  | -0.336053 |
| C | 1.730083  | 1.253720  | 0.494087  |
| C | 2.151220  | -0.068177 | -0.176338 |

|   |           |           |           |
|---|-----------|-----------|-----------|
| C | 1.598559  | -0.503083 | -1.420768 |
| N | 0.655885  | 0.204807  | -2.108263 |
| C | 0.218849  | -0.294522 | -3.290312 |
| C | 0.652033  | -1.496022 | -3.846349 |
| O | 0.095221  | -1.860045 | -5.058056 |
| C | 0.390801  | -3.136572 | -5.661064 |
| C | -0.438077 | -4.289961 | -5.050883 |
| N | -1.323016 | -3.991008 | -4.090155 |
| C | -2.197727 | -4.928553 | -3.373292 |
| C | -1.469033 | -5.952490 | -2.474467 |
| O | -0.569654 | -5.289744 | -1.586149 |
| C | -0.158634 | -6.080347 | -0.471082 |
| C | 1.047685  | -5.433453 | 0.246543  |
| O | 0.961792  | -4.013910 | 0.438227  |
| C | -0.192474 | -3.484190 | 1.109921  |
| C | -0.146113 | -3.679518 | 2.637360  |
| N | 1.038941  | -3.937278 | 3.211832  |
| C | 1.260062  | -3.963241 | 4.672599  |
| C | 2.551019  | -4.757430 | 5.114512  |
| C | 3.844778  | -4.025002 | 4.690262  |
| C | 2.577847  | -6.153626 | 4.439957  |
| C | 2.608137  | -4.988382 | 6.644740  |
| C | 0.984111  | -2.593015 | 5.388575  |
| N | 1.062133  | -1.423940 | 4.692509  |
| C | 0.583706  | -0.129588 | 5.240517  |
| C | -0.835144 | 0.276331  | 4.742772  |
| N | -1.704301 | -0.691241 | 4.412210  |
| C | -3.070066 | -0.490287 | 3.919396  |
| C | -3.136707 | -0.329471 | 2.403151  |
| C | -3.116647 | -1.458322 | 1.581490  |
| C | -3.193935 | -1.320643 | 0.198502  |
| C | -3.327217 | -0.054474 | -0.380183 |
| C | -3.423878 | 0.097623  | -1.866639 |
| C | -2.999769 | 1.120061  | -2.732370 |
| C | -2.239757 | 2.386688  | -2.402539 |
| N | -3.279783 | 0.946724  | -4.012158 |
| C | -3.897014 | -0.181714 | -4.231686 |
| S | -4.197049 | -1.141361 | -2.830977 |
| C | -3.383283 | 1.070970  | 0.447992  |
| C | -3.292864 | 0.935356  | 1.832100  |
| O | -1.172143 | 1.461006  | 4.748976  |
| C | 1.694247  | 0.890275  | 4.859662  |
| C | 2.853589  | 0.061943  | 4.323131  |
| O | 3.670727  | -0.363712 | 5.401587  |
| C | 2.122658  | -1.141118 | 3.715819  |
| O | 0.521960  | -2.632889 | 6.534478  |
| O | -1.177539 | -3.551720 | 3.300709  |
| O | -0.283572 | -5.440524 | -5.461455 |
| C | 1.613441  | -2.234744 | -3.144521 |
| C | 2.114234  | -1.741428 | -1.918064 |

|   |           |           |           |
|---|-----------|-----------|-----------|
| N | 3.077079  | -2.449152 | -1.261876 |
| C | 3.512001  | -1.930601 | -0.087407 |
| N | 3.098050  | -0.778783 | 0.490173  |
| C | 0.254249  | 1.276002  | 0.965723  |
| C | -0.142278 | 2.629525  | 1.599142  |
| O | -1.931297 | 4.539835  | 0.653223  |
| C | -0.907228 | 6.868662  | -0.776883 |
| C | -0.652236 | 7.795784  | -1.783830 |
| H | 0.938400  | 5.748329  | -3.983375 |
| H | 0.482561  | 4.132831  | -2.246294 |
| H | 2.118292  | 3.941562  | 1.293156  |
| H | 1.881768  | 4.716276  | -0.235102 |
| H | 3.177384  | 2.581902  | -0.434827 |
| H | 1.687612  | 2.457122  | -1.344483 |
| H | 2.333197  | 1.318125  | 1.403294  |
| H | -0.519736 | 0.297282  | -3.811095 |
| H | 1.455107  | -3.369882 | -5.634147 |
| H | 0.127097  | -3.064723 | -6.715984 |
| H | -1.361539 | -3.019304 | -3.811338 |
| H | -2.837872 | -5.456883 | -4.083363 |
| H | -2.873199 | -4.341978 | -2.748349 |
| H | -0.907799 | -6.664297 | -3.081955 |
| H | -2.219114 | -6.525087 | -1.924147 |
| H | 0.132470  | -7.081208 | -0.797489 |
| H | -0.990910 | -6.206131 | 0.223627  |
| H | 1.950976  | -5.625310 | -0.333510 |
| H | 1.205220  | -5.926691 | 1.206522  |
| H | -1.123455 | -3.881504 | 0.705344  |
| H | -0.215016 | -2.409555 | 0.926069  |
| H | 1.850362  | -4.025019 | 2.618024  |
| H | 0.435084  | -4.584917 | 5.029335  |
| H | 3.920126  | -3.037617 | 5.144804  |
| H | 4.733583  | -4.574573 | 5.004508  |
| H | 3.919248  | -3.911420 | 3.608345  |
| H | 1.676102  | -6.725451 | 4.663820  |
| H | 2.667174  | -6.089343 | 3.355140  |
| H | 3.425091  | -6.750542 | 4.781452  |
| H | 1.721597  | -5.511191 | 7.006360  |
| H | 3.471906  | -5.591178 | 6.929597  |
| H | 2.693725  | -4.053256 | 7.199150  |
| H | 0.440181  | -0.195355 | 6.320476  |
| H | -1.354339 | -1.640866 | 4.371602  |
| H | -3.550878 | 0.364994  | 4.401988  |
| H | -3.670850 | -1.356962 | 4.202666  |
| H | -3.037957 | -2.446257 | 2.011117  |
| H | -3.154570 | -2.207100 | -0.418287 |
| H | -2.906945 | 3.239196  | -2.274791 |
| H | -1.668871 | 2.283196  | -1.481590 |
| H | -1.517302 | 2.657201  | -3.173660 |
| H | -4.208925 | -0.511568 | -5.213381 |

|   |           |           |           |
|---|-----------|-----------|-----------|
| H | -3.503415 | 2.058257  | 0.025099  |
| H | -3.337453 | 1.817241  | 2.456710  |
| H | 1.967802  | 1.558226  | 5.677513  |
| H | 1.375742  | 1.523823  | 4.031435  |
| H | 3.478508  | 0.560832  | 3.578058  |
| H | 4.008731  | 0.422723  | 5.854030  |
| H | 1.661782  | -0.813219 | 2.784285  |
| H | 2.783065  | -1.963130 | 3.449690  |
| H | 2.001780  | -3.173986 | -3.502596 |
| H | 4.270536  | -2.492425 | 0.443736  |
| H | 0.091909  | 0.510366  | 1.724634  |
| H | -0.431764 | 1.055602  | 0.148255  |
| H | -1.180462 | 2.637812  | 1.934383  |
| H | 0.457382  | 2.826069  | 2.488305  |
| H | -1.437517 | 7.190925  | 0.110414  |
| H | -0.981795 | 8.818196  | -1.663873 |

conformer\_9

|   |           |           |           |
|---|-----------|-----------|-----------|
| F | 1.897399  | 10.939694 | -7.267178 |
| C | 0.916040  | 11.060151 | -8.196736 |
| F | -0.005901 | 11.958866 | -7.767858 |
| F | 1.487971  | 11.581821 | -9.309134 |
| O | 0.352048  | 9.858647  | -8.498179 |
| C | -0.298320 | 9.111016  | -7.537664 |
| C | -0.851661 | 7.884248  | -7.958315 |
| C | -1.534563 | 7.049294  | -7.052212 |
| C | -1.660598 | 7.421914  | -5.695317 |
| C | -2.417985 | 6.562578  | -4.719714 |
| N | -2.060727 | 5.259646  | -4.577576 |
| C | -2.864366 | 4.320985  | -3.781550 |
| C | -2.107217 | 3.952940  | -2.492774 |
| C | -0.711189 | 3.376941  | -2.811095 |
| C | 0.096789  | 3.074987  | -1.548067 |
| C | 0.520464  | 1.764129  | -1.206595 |
| N | 0.250660  | 0.675749  | -1.968167 |
| C | 0.696228  | -0.530030 | -1.563946 |
| C | 1.410616  | -0.739952 | -0.367648 |
| O | 1.784351  | -2.027917 | -0.040461 |
| C | 2.199731  | -2.274813 | 1.305183  |
| C | 2.539850  | -3.756720 | 1.490002  |
| N | 2.820189  | -4.437092 | 0.376426  |
| C | 3.128292  | -5.855212 | 0.261771  |
| C | 2.080634  | -6.518174 | -0.637001 |
| O | 1.985245  | -5.762795 | -1.842819 |
| C | 0.702427  | -5.805389 | -2.455949 |
| C | -0.173486 | -4.652559 | -1.935174 |
| O | -0.572633 | -4.928314 | -0.604332 |
| C | -1.289393 | -3.866862 | 0.019020  |
| C | -1.561431 | -4.242095 | 1.477904  |
| N | -1.023364 | -5.391041 | 1.889025  |

|   |           |           |           |
|---|-----------|-----------|-----------|
| C | -1.055315 | -6.014799 | 3.208290  |
| C | -2.240547 | -7.053060 | 3.289972  |
| C | -2.296152 | -7.751157 | 4.666091  |
| C | -2.118873 | -8.154307 | 2.209816  |
| C | -3.602686 | -6.346762 | 3.104694  |
| C | 0.372392  | -6.580679 | 3.415730  |
| N | 1.003038  | -6.501255 | 4.608848  |
| C | 0.489883  | -5.953324 | 5.873770  |
| C | 0.676017  | -4.435509 | 6.056706  |
| N | 1.422250  | -3.744029 | 5.184792  |
| C | 1.786709  | -2.339094 | 5.351723  |
| C | 0.908659  | -1.347228 | 4.600043  |
| C | -0.395743 | -1.678152 | 4.174988  |
| C | -1.166144 | -0.748708 | 3.452922  |
| C | -0.656923 | 0.529200  | 3.142864  |
| C | -1.436713 | 1.462936  | 2.334350  |
| C | -2.183425 | 1.224858  | 1.199665  |
| C | -2.380268 | -0.076330 | 0.485403  |
| N | -2.783607 | 2.374884  | 0.678606  |
| C | -2.505025 | 3.458889  | 1.403844  |
| S | -1.476601 | 3.150972  | 2.790253  |
| C | 0.632441  | 0.871238  | 3.606033  |
| C | 1.409260  | -0.057940 | 4.325236  |
| O | 0.145266  | -3.898332 | 7.025101  |
| C | 1.326518  | -6.680766 | 6.936873  |
| C | 2.682652  | -6.861998 | 6.272752  |
| O | 3.371718  | -7.953035 | 6.842561  |
| C | 2.324683  | -7.107316 | 4.806435  |
| O | 0.921623  | -7.122570 | 2.451284  |
| O | -2.239576 | -3.516487 | 2.199428  |
| O | 2.560240  | -4.257146 | 2.615972  |
| C | 1.701164  | 0.402383  | 0.416970  |
| C | 1.266617  | 1.678692  | 0.004435  |
| N | 1.560649  | 2.767090  | 0.741744  |
| C | 1.110740  | 3.939098  | 0.310347  |
| N | 0.396970  | 4.150474  | -0.787256 |
| C | 0.059737  | 4.289228  | -3.790625 |
| C | -0.793427 | 4.654196  | -5.021224 |
| O | -3.346146 | 7.072435  | -4.090808 |
| C | -1.132121 | 8.660034  | -5.273807 |
| C | -0.449563 | 9.494732  | -6.180976 |
| H | -0.755606 | 7.583109  | -8.991650 |
| H | -1.962563 | 6.120728  | -7.402734 |
| H | -3.057616 | 3.424950  | -4.372821 |
| H | -3.847382 | 4.723276  | -3.529927 |
| H | -2.683720 | 3.228107  | -1.918257 |
| H | -2.012158 | 4.839778  | -1.864436 |
| H | -0.884440 | 2.439521  | -3.339000 |
| H | 0.453726  | -1.362653 | -2.207440 |
| H | 1.397980  | -2.006458 | 1.990944  |

|   |           |           |           |
|---|-----------|-----------|-----------|
| H | 3.088302  | -1.696773 | 1.560138  |
| H | 2.704299  | -3.937716 | -0.494941 |
| H | 3.165158  | -6.348136 | 1.234620  |
| H | 4.118368  | -5.958151 | -0.182590 |
| H | 1.132071  | -6.563554 | -0.104640 |
| H | 2.357330  | -7.547653 | -0.866541 |
| H | 0.217510  | -6.775775 | -2.335345 |
| H | 0.854747  | -5.666595 | -3.526469 |
| H | -1.060247 | -4.544701 | -2.561324 |
| H | 0.382549  | -3.716116 | -1.986877 |
| H | -2.234216 | -3.686172 | -0.495014 |
| H | -0.709625 | -2.944557 | -0.001694 |
| H | -0.452416 | -5.871553 | 1.203549  |
| H | -1.225621 | -5.226086 | 3.941728  |
| H | -2.510374 | -7.042656 | 5.466163  |
| H | -3.089380 | -8.499374 | 4.696953  |
| H | -1.368453 | -8.271089 | 4.907032  |
| H | -2.102767 | -7.737263 | 1.202489  |
| H | -1.212903 | -8.748634 | 2.331502  |
| H | -2.960359 | -8.846810 | 2.252365  |
| H | -3.728499 | -5.957336 | 2.094774  |
| H | -4.436416 | -7.027293 | 3.280675  |
| H | -3.714560 | -5.508011 | 3.793281  |
| H | -0.561413 | -6.180177 | 6.027423  |
| H | 1.813457  | -4.209644 | 4.368926  |
| H | 2.812479  | -2.228944 | 4.998413  |
| H | 1.801207  | -2.060521 | 6.407441  |
| H | -0.822551 | -2.647200 | 4.386196  |
| H | -2.157845 | -1.033244 | 3.132438  |
| H | -2.547222 | 0.076716  | -0.580986 |
| H | -1.507149 | -0.718892 | 0.588550  |
| H | -3.238488 | -0.617301 | 0.883642  |
| H | -2.893229 | 4.427873  | 1.124732  |
| H | 1.045202  | 1.845718  | 3.384922  |
| H | 2.398625  | 0.222998  | 4.656817  |
| H | 0.874519  | -7.652664 | 7.141138  |
| H | 1.393681  | -6.153630 | 7.890625  |
| H | 3.273177  | -5.948814 | 6.372087  |
| H | 4.224868  | -8.023838 | 6.437732  |
| H | 3.066762  | -6.678055 | 4.130404  |
| H | 2.253132  | -8.175673 | 4.592050  |
| H | 2.253517  | 0.339906  | 1.339458  |
| H | 1.345574  | 4.803894  | 0.913516  |
| H | 0.981828  | 3.798900  | -4.104458 |
| H | 0.358751  | 5.206988  | -3.281682 |
| H | -0.199815 | 5.301616  | -5.663991 |
| H | -1.009115 | 3.762340  | -5.611138 |
| H | -1.251446 | 8.970946  | -4.245094 |
| H | -0.056036 | 10.428738 | -5.808693 |

conformer\_10

|   |           |           |           |
|---|-----------|-----------|-----------|
| F | 1.695302  | -3.866814 | 1.050193  |
| C | 1.053751  | -3.274128 | 2.123894  |
| F | 0.165503  | -4.199729 | 2.637480  |
| F | 1.964666  | -3.006505 | 3.129073  |
| O | 0.272282  | -2.127759 | 1.747100  |
| C | 0.813679  | -1.009918 | 1.155967  |
| C | 2.193002  | -0.817134 | 0.921067  |
| C | 2.659079  | 0.376487  | 0.345341  |
| C | 1.771842  | 1.400712  | -0.030208 |
| C | 2.303944  | 2.651747  | -0.629721 |
| N | 1.794262  | 3.177519  | -1.760023 |
| C | 0.739407  | 2.538233  | -2.550012 |
| C | 0.940481  | 2.812256  | -4.045705 |
| C | 2.435740  | 2.711124  | -4.389015 |
| C | 3.013998  | 1.354051  | -3.967047 |
| C | 2.540937  | 0.152372  | -4.535596 |
| N | 1.615408  | 0.153770  | -5.507068 |
| C | 1.205431  | -1.033871 | -5.970393 |
| C | 1.678266  | -2.273725 | -5.499553 |
| O | 1.158716  | -3.424132 | -6.044242 |
| C | 1.491729  | -4.710322 | -5.486626 |
| C | 0.805855  | -4.948297 | -4.136985 |
| N | -0.267164 | -4.200470 | -3.871999 |
| C | -1.100336 | -4.334199 | -2.689886 |
| C | -0.468377 | -3.603935 | -1.494828 |
| O | -1.251756 | -3.737188 | -0.295692 |
| C | -2.474676 | -2.983788 | -0.323973 |
| C | -3.227916 | -3.107307 | 1.007802  |
| O | -2.575411 | -2.357765 | 2.040925  |
| C | -3.281755 | -2.425514 | 3.288606  |
| C | -2.782565 | -1.378750 | 4.282896  |
| N | -1.473995 | -1.126488 | 4.290003  |
| C | -0.814856 | -0.203047 | 5.202438  |
| C | -0.332350 | -0.941163 | 6.485828  |
| C | -1.539626 | -1.411648 | 7.316260  |
| C | 0.471300  | 0.020282  | 7.377724  |
| C | 0.528057  | -2.188544 | 6.208866  |
| C | 0.321361  | 0.459660  | 4.400732  |
| N | 0.276590  | 1.769518  | 4.102847  |
| C | -0.540684 | 2.749568  | 4.819896  |
| C | -1.981732 | 2.812564  | 4.304909  |
| N | -2.257186 | 2.118434  | 3.199685  |
| C | -3.569541 | 2.065106  | 2.575447  |
| C | -3.394342 | 1.982098  | 1.074447  |
| C | -3.672634 | 0.792658  | 0.378261  |
| C | -3.486803 | 0.717339  | -1.013345 |
| C | -3.011675 | 1.827467  | -1.738301 |
| C | -2.787526 | 1.753346  | -3.202612 |
| C | -2.145734 | 0.699654  | -3.859137 |

|   |           |           |           |
|---|-----------|-----------|-----------|
| C | -1.543076 | -0.513104 | -3.182820 |
| N | -2.086133 | 0.884401  | -5.231792 |
| C | -2.626245 | 2.007793  | -5.545145 |
| S | -3.279629 | 2.985209  | -4.280394 |
| C | -2.761684 | 3.026134  | -1.042193 |
| C | -2.943872 | 3.099493  | 0.349971  |
| O | -2.829365 | 3.470353  | 4.906707  |
| C | 0.155895  | 4.101156  | 4.629936  |
| C | 1.606744  | 3.702552  | 4.383467  |
| O | 2.203242  | 3.356217  | 5.620684  |
| C | 1.421493  | 2.456757  | 3.520707  |
| O | 1.246180  | -0.240432 | 3.997885  |
| O | -3.575837 | -0.809903 | 5.032340  |
| O | 1.231225  | -5.796625 | -3.352236 |
| C | 2.661177  | -2.251440 | -4.490149 |
| C | 3.116350  | -1.017321 | -3.999916 |
| N | 4.064187  | -1.005227 | -3.060596 |
| C | 4.469056  | 0.195654  | -2.628502 |
| N | 3.979554  | 1.371596  | -3.039938 |
| C | 3.095163  | 3.937453  | -3.718950 |
| C | 2.403440  | 4.341164  | -2.403338 |
| O | 3.253963  | 3.186698  | -0.057377 |
| C | 0.396607  | 1.210173  | 0.203643  |
| C | -0.071712 | 0.019516  | 0.786069  |
| H | 2.934457  | -1.555668 | 1.188429  |
| H | 3.719972  | 0.516229  | 0.194320  |
| H | -0.231164 | 2.929259  | -2.251607 |
| H | 0.744046  | 1.456506  | -2.417556 |
| H | 0.578462  | 3.810660  | -4.295133 |
| H | 0.345431  | 2.107605  | -4.621343 |
| H | 2.563412  | 2.805801  | -5.468259 |
| H | 0.454167  | -1.040853 | -6.750320 |
| H | 2.570282  | -4.846400 | -5.405669 |
| H | 1.121106  | -5.470254 | -6.174710 |
| H | -0.536144 | -3.519645 | -4.569265 |
| H | -1.233190 | -5.388413 | -2.441750 |
| H | -2.072582 | -3.908639 | -2.932479 |
| H | -0.320513 | -2.550562 | -1.732681 |
| H | 0.508984  | -4.047578 | -1.309843 |
| H | -3.135068 | -3.379194 | -1.105143 |
| H | -2.265837 | -1.925856 | -0.526392 |
| H | -3.303424 | -4.165541 | 1.293922  |
| H | -4.238778 | -2.702199 | 0.862417  |
| H | -3.152406 | -3.415706 | 3.727142  |
| H | -4.346603 | -2.252693 | 3.124020  |
| H | -0.899166 | -1.567685 | 3.584444  |
| H | -1.536968 | 0.541022  | 5.526165  |
| H | -2.078460 | -2.203497 | 6.797245  |
| H | -1.205449 | -1.806774 | 8.276105  |
| H | -2.218750 | -0.579347 | 7.503763  |



|   |           |           |           |
|---|-----------|-----------|-----------|
| H | 1.371695  | 0.361914  | 6.866746  |
| H | -0.138071 | 0.885180  | 7.640328  |
| H | 0.772531  | -0.484045 | 8.296533  |
| H | 1.484647  | -1.915376 | 5.767352  |
| H | 0.733183  | -2.707670 | 7.145541  |
| H | 0.009588  | -2.878343 | 5.543141  |
| H | -0.537997 | 2.525085  | 5.887299  |
| H | -1.491082 | 1.620371  | 2.765833  |
| H | -4.154418 | 2.955538  | 2.810862  |
| H | -4.105213 | 1.190042  | 2.944495  |
| H | -4.033299 | -0.072145 | 0.916061  |
| H | -3.724706 | -0.203368 | -1.525488 |
| H | -2.303807 | -1.285240 | -3.075362 |
| H | -0.730714 | -0.901833 | -3.795984 |
| H | -1.142979 | -0.244240 | -2.205467 |
| H | -2.665325 | 2.322680  | -6.578357 |
| H | -2.413828 | 3.902316  | -1.572503 |
| H | -2.732325 | 4.022858  | 0.871200  |
| H | 0.036699  | 4.752679  | 5.496291  |
| H | -0.230587 | 4.597390  | 3.737683  |
| H | 2.174768  | 4.482359  | 3.872349  |
| H | 3.089117  | 3.019059  | 5.441574  |
| H | 1.175005  | 2.758092  | 2.502269  |
| H | 2.338418  | 1.865309  | 3.503757  |
| H | 3.087744  | -3.152140 | -4.077568 |
| H | 5.251334  | 0.229430  | -1.880555 |
| H | 3.005599  | 4.786966  | -4.397666 |
| H | 4.161452  | 3.779060  | -3.555610 |
| H | 3.127443  | 4.854377  | -1.769572 |
| H | 1.610470  | 5.058319  | -2.620880 |
| H | -0.305499 | 1.990227  | -0.048064 |
| H | -1.130387 | -0.102570 | 0.962286  |

conformer\_11

|   |          |           |           |
|---|----------|-----------|-----------|
| F | 8.766944 | 14.597183 | -4.183485 |
| C | 8.043668 | 13.551242 | -4.643848 |
| F | 7.616399 | 13.854140 | -5.888731 |
| F | 8.854606 | 12.472237 | -4.693675 |
| O | 6.952547 | 13.332351 | -3.765960 |
| C | 6.097789 | 12.306239 | -4.052080 |
| C | 6.178320 | 11.439319 | -5.145108 |
| C | 5.225511 | 10.427259 | -5.312227 |
| C | 4.198716 | 10.269577 | -4.377347 |
| C | 3.180679 | 9.215728  | -4.596340 |
| N | 2.860431 | 8.352802  | -3.539575 |
| C | 3.872101 | 7.934466  | -2.564820 |
| C | 3.251046 | 7.424878  | -1.265303 |
| C | 2.119761 | 6.400262  | -1.471841 |
| C | 2.600947 | 4.986053  | -1.786343 |
| C | 1.794654 | 3.896974  | -1.449409 |

|   |           |            |           |
|---|-----------|------------|-----------|
| N | 0.590092  | 4.018473   | -0.833546 |
| C | -0.091302 | 2.882663   | -0.561401 |
| C | 0.359946  | 1.611127   | -0.874991 |
| O | -0.463221 | 0.582432   | -0.524350 |
| C | -0.046401 | -0.743176  | -0.828760 |
| C | 1.024335  | -1.306475  | 0.117677  |
| N | 1.709677  | -2.386575  | -0.391207 |
| C | 2.754798  | -3.069172  | 0.357583  |
| C | 2.230482  | -4.287245  | 1.120199  |
| O | 1.893930  | -5.313899  | 0.177089  |
| C | 1.506867  | -6.525063  | 0.835077  |
| C | 1.075239  | -7.562733  | -0.204574 |
| O | -0.230873 | -7.320170  | -0.746104 |
| C | -0.287782 | -6.209397  | -1.639927 |
| C | -0.838006 | -4.940522  | -0.979148 |
| N | -1.736914 | -5.201211  | 0.029054  |
| C | -2.289774 | -4.180491  | 0.926324  |
| C | -3.846003 | -4.107933  | 0.806926  |
| C | -4.518097 | -5.453715  | 1.140023  |
| C | -4.231027 | -3.720925  | -0.639102 |
| C | -4.428505 | -3.031478  | 1.741110  |
| C | -1.783960 | -4.564319  | 2.346900  |
| N | -1.590150 | -3.586029  | 3.302056  |
| C | -1.072424 | -3.934082  | 4.643248  |
| C | -2.082586 | -4.602524  | 5.610981  |
| N | -2.897371 | -5.554505  | 5.046861  |
| C | -3.753500 | -6.389940  | 5.852012  |
| C | -4.776702 | -7.078905  | 4.989374  |
| C | -6.028006 | -6.489328  | 4.765911  |
| C | -6.960208 | -7.100570  | 3.922657  |
| C | -6.655130 | -8.307613  | 3.279984  |
| C | -7.622985 | -8.952679  | 2.393601  |
| C | -8.211954 | -10.208605 | 2.466287  |
| C | -8.011763 | -11.230833 | 3.529382  |
| N | -9.080232 | -10.511237 | 1.424888  |
| C | -9.140188 | -9.497410  | 0.591364  |
| S | -8.179428 | -8.137373  | 0.984535  |
| C | -5.403175 | -8.895600  | 3.502400  |
| C | -4.470448 | -8.285619  | 4.346072  |
| O | -2.077747 | -4.388852  | 6.823559  |
| C | -0.594615 | -2.601871  | 5.242619  |
| C | -0.257216 | -1.763643  | 4.025149  |
| O | 1.040203  | -2.131304  | 3.559238  |
| C | -1.341402 | -2.171866  | 3.025584  |
| O | -1.630228 | -5.758474  | 2.643439  |
| O | -0.537363 | -3.809758  | -1.356463 |
| O | 1.254843  | -0.832463  | 1.230067  |
| C | 1.595444  | 1.518838   | -1.508250 |
| C | 2.338851  | 2.654115   | -1.809879 |
| N | 3.521752  | 2.502677   | -2.426835 |

|   |           |            |           |
|---|-----------|------------|-----------|
| C | 4.198583  | 3.621160   | -2.703119 |
| N | 3.797027  | 4.863941   | -2.417758 |
| C | 1.129347  | 6.912782   | -2.527468 |
| C | 1.821955  | 7.362897   | -3.808489 |
| O | 2.641263  | 9.172490   | -5.700673 |
| C | 4.096968  | 11.147609  | -3.295302 |
| C | 5.050769  | 12.155569  | -3.133470 |
| H | 6.961096  | 11.518927  | -5.894458 |
| H | 5.283528  | 9.764532   | -6.173491 |
| H | 4.554592  | 8.753198   | -2.326724 |
| H | 4.488130  | 7.170052   | -3.049667 |
| H | 2.826106  | 8.290724   | -0.739134 |
| H | 4.033236  | 7.018163   | -0.613146 |
| H | 1.592332  | 6.345835   | -0.509299 |
| H | -1.047860 | 3.025783   | -0.064970 |
| H | 0.258253  | -0.836256  | -1.877639 |
| H | -0.934116 | -1.370959  | -0.702586 |
| H | 1.223879  | -2.942062  | -1.097642 |
| H | 3.217003  | -2.362845  | 1.054566  |
| H | 3.503619  | -3.379928  | -0.378307 |
| H | 1.341340  | -4.032775  | 1.705285  |
| H | 3.014008  | -4.658997  | 1.789580  |
| H | 0.686696  | -6.319068  | 1.528031  |
| H | 2.368786  | -6.907657  | 1.392504  |
| H | 1.020380  | -8.541125  | 0.283989  |
| H | 1.801047  | -7.638438  | -1.022474 |
| H | -0.984624 | -6.472574  | -2.442867 |
| H | 0.685825  | -5.999305  | -2.095441 |
| H | -1.737601 | -6.161188  | 0.375054  |
| H | -1.863068 | -3.221458  | 0.630298  |
| H | -4.306144 | -5.761527  | 2.167361  |
| H | -5.607557 | -5.384191  | 1.039870  |
| H | -4.181861 | -6.253652  | 0.472257  |
| H | -3.762519 | -2.774145  | -0.930998 |
| H | -3.922109 | -4.485357  | -1.360101 |
| H | -5.315703 | -3.599895  | -0.741437 |
| H | -3.976094 | -2.053380  | 1.546086  |
| H | -5.510027 | -2.925665  | 1.594949  |
| H | -4.274681 | -3.281472  | 2.795557  |
| H | -0.226092 | -4.620837  | 4.514329  |
| H | -2.598238 | -5.924807  | 4.145554  |
| H | -4.239385 | -5.783656  | 6.625503  |
| H | -3.126024 | -7.124689  | 6.369848  |
| H | -6.280485 | -5.543275  | 5.240969  |
| H | -7.926592 | -6.624073  | 3.771671  |
| H | -8.051678 | -10.774414 | 4.523356  |
| H | -8.790553 | -11.998605 | 3.481700  |
| H | -7.041757 | -11.721997 | 3.406589  |
| H | -9.759605 | -9.514635  | -0.295975 |
| H | -5.135974 | -9.826314  | 3.006033  |

|   |           |           |           |
|---|-----------|-----------|-----------|
| H | -3.497415 | -8.751936 | 4.487694  |
| H | 0.258617  | -2.753575 | 5.911829  |
| H | -1.397638 | -2.114057 | 5.809035  |
| H | -0.256327 | -0.690432 | 4.236356  |
| H | 1.237798  | -1.544405 | 2.792789  |
| H | -2.271834 | -1.633624 | 3.230093  |
| H | -1.029758 | -2.007235 | 1.996601  |
| H | 2.024372  | 0.561240  | -1.785351 |
| H | 5.155063  | 3.511377  | -3.203156 |
| H | 0.592259  | 7.773043  | -2.105759 |
| H | 0.371818  | 6.157425  | -2.766104 |
| H | 2.285023  | 6.518334  | -4.332508 |
| H | 1.071328  | 7.789003  | -4.484138 |
| H | 3.279321  | 11.055696 | -2.584722 |
| H | 4.970966  | 12.833669 | -2.285794 |

conformer\_12

|   |           |           |           |
|---|-----------|-----------|-----------|
| F | 5.044973  | 14.990314 | -3.145487 |
| C | 4.791810  | 13.958246 | -3.984998 |
| F | 3.576348  | 13.455682 | -3.673692 |
| F | 4.776610  | 14.441267 | -5.247114 |
| O | 5.810165  | 12.980916 | -3.820469 |
| C | 5.738427  | 11.847111 | -4.578620 |
| C | 4.754999  | 11.541337 | -5.522940 |
| C | 4.808440  | 10.334802 | -6.231428 |
| C | 5.839541  | 9.424507  | -5.986021 |
| C | 5.900162  | 8.166921  | -6.765993 |
| N | 5.949627  | 6.948404  | -6.080468 |
| C | 6.018052  | 5.729545  | -6.884305 |
| C | 6.677085  | 4.572201  | -6.135457 |
| C | 6.140505  | 4.354972  | -4.708244 |
| C | 4.813074  | 3.601979  | -4.643865 |
| C | 4.525173  | 2.810761  | -3.528646 |
| N | 5.376321  | 2.650424  | -2.477891 |
| C | 4.982801  | 1.855522  | -1.453009 |
| C | 3.764473  | 1.202682  | -1.419355 |
| O | 3.287689  | 0.388866  | -0.433892 |
| C | 4.144069  | 0.163631  | 0.687563  |
| C | 3.467505  | -0.766008 | 1.701282  |
| N | 2.091647  | -0.729349 | 1.679553  |
| C | 1.260903  | -1.622791 | 2.472730  |
| C | 1.116308  | -3.004568 | 1.828512  |
| O | 0.463840  | -2.865252 | 0.557228  |
| C | 0.328227  | -4.127331 | -0.106535 |
| C | -0.347587 | -3.927389 | -1.466254 |
| O | -1.756749 | -3.669086 | -1.366210 |
| C | -2.072605 | -2.348781 | -0.920742 |
| C | -2.576952 | -2.313207 | 0.528250  |
| N | -3.300862 | -3.430145 | 0.885507  |
| C | -3.757048 | -3.673990 | 2.258394  |

|   |            |           |           |
|---|------------|-----------|-----------|
| C | -5.225806  | -4.209148 | 2.292613  |
| C | -5.360033  | -5.606970 | 1.661188  |
| C | -6.149534  | -3.239855 | 1.519955  |
| C | -5.743129  | -4.271035 | 3.741401  |
| C | -2.714231  | -4.644578 | 2.894873  |
| N | -2.396970  | -4.509008 | 4.234425  |
| C | -1.395178  | -5.407686 | 4.841055  |
| C | -1.893791  | -6.856405 | 5.026903  |
| N | -3.239166  | -6.968212 | 5.283377  |
| C | -3.875982  | -8.217617 | 5.628171  |
| C | -5.356636  | -8.141591 | 5.364512  |
| C | -6.224513  | -7.594511 | 6.318431  |
| C | -7.593083  | -7.483097 | 6.052651  |
| C | -8.120363  | -7.912573 | 4.827390  |
| C | -9.549776  | -7.790695 | 4.537083  |
| C | -10.207302 | -7.126557 | 3.508747  |
| C | -9.583642  | -6.316926 | 2.425677  |
| N | -11.593494 | -7.240767 | 3.526325  |
| C | -11.963621 | -7.977624 | 4.551588  |
| S | -10.703963 | -8.573372 | 5.544530  |
| C | -7.249918  | -8.451380 | 3.871603  |
| C | -5.881426  | -8.562679 | 4.136182  |
| O | -1.123938  | -7.816693 | 5.069846  |
| C | -1.098661  | -4.783029 | 6.209192  |
| C | -1.307819  | -3.298301 | 5.964157  |
| O | -0.150542  | -2.755052 | 5.319577  |
| C | -2.500393  | -3.265959 | 5.003714  |
| O | -2.213195  | -5.557358 | 2.225064  |
| O | -2.405789  | -1.350979 | 1.274303  |
| O | 4.106159   | -1.452603 | 2.499097  |
| C | 2.913888   | 1.388925  | -2.508425 |
| C | 3.267053   | 2.192034  | -3.584193 |
| N | 2.400506   | 2.334976  | -4.602433 |
| C | 2.785419   | 3.126135  | -5.610232 |
| N | 3.952955   | 3.775689  | -5.681382 |
| C | 6.073318   | 5.692194  | -3.955387 |
| C | 5.354166   | 6.775758  | -4.750335 |
| O | 5.936937   | 8.259574  | -7.993325 |
| C | 6.837807   | 9.729973  | -5.057580 |
| C | 6.778557   | 10.935529 | -4.354517 |
| H | 3.930119   | 12.214368 | -5.742957 |
| H | 4.041358   | 10.110044 | -6.970189 |
| H | 6.589839   | 5.924208  | -7.799315 |
| H | 4.999131   | 5.485527  | -7.201976 |
| H | 7.749324   | 4.798971  | -6.055399 |
| H | 6.598930   | 3.652808  | -6.728179 |
| H | 6.887012   | 3.722733  | -4.207972 |
| H | 5.712435   | 1.774474  | -0.652593 |
| H | 4.361174   | 1.105624  | 1.203941  |
| H | 5.066656   | -0.327790 | 0.357639  |

|   |            |           |           |
|---|------------|-----------|-----------|
| H | 1.664208   | -0.296482 | 0.862570  |
| H | 0.282602   | -1.139707 | 2.560087  |
| H | 1.702473   | -1.719358 | 3.469582  |
| H | 0.509177   | -3.648295 | 2.473966  |
| H | 2.099892   | -3.465209 | 1.683380  |
| H | -0.269319  | -4.799072 | 0.517074  |
| H | 1.325221   | -4.555260 | -0.258063 |
| H | -0.251337  | -4.854210 | -2.041194 |
| H | 0.132139   | -3.126894 | -2.041130 |
| H | -2.891813  | -1.981369 | -1.548381 |
| H | -1.228969  | -1.659723 | -1.035735 |
| H | -3.169913  | -4.242530 | 0.283850  |
| H | -3.734834  | -2.715186 | 2.780395  |
| H | -4.780126  | -6.355460 | 2.209849  |
| H | -6.403944  | -5.941000 | 1.665862  |
| H | -5.021819  | -5.614358 | 0.619857  |
| H | -6.072958  | -2.221505 | 1.917544  |
| H | -5.901398  | -3.205135 | 0.453626  |
| H | -7.199094  | -3.547475 | 1.596675  |
| H | -5.661522  | -3.295761 | 4.233581  |
| H | -6.797235  | -4.568230 | 3.774946  |
| H | -5.188676  | -4.998105 | 4.336516  |
| H | -0.507405  | -5.415506 | 4.197156  |
| H | -3.750680  | -6.112725 | 5.466450  |
| H | -3.682445  | -8.415350 | 6.688845  |
| H | -3.417888  | -9.036367 | 5.061257  |
| H | -5.840353  | -7.244193 | 7.275607  |
| H | -8.240502  | -7.046366 | 6.811563  |
| H | -9.078405  | -6.966542 | 1.704480  |
| H | -10.340469 | -5.737361 | 1.887365  |
| H | -8.854558  | -5.613040 | 2.837304  |
| H | -13.001841 | -8.201252 | 4.764824  |
| H | -7.627727  | -8.796331 | 2.910546  |
| H | -5.225792  | -8.976499 | 3.371175  |
| H | -0.084110  | -5.027335 | 6.540295  |
| H | -1.804180  | -5.139422 | 6.969585  |
| H | -1.496198  | -2.724126 | 6.875928  |
| H | 0.550050   | -2.717817 | 6.004484  |
| H | -3.447878  | -3.302413 | 5.549499  |
| H | -2.463884  | -2.389387 | 4.353681  |
| H | 1.945216   | 0.893081  | -2.517820 |
| H | 2.093656   | 3.252702  | -6.437433 |
| H | 7.099926   | 6.031104  | -3.761307 |
| H | 5.591992   | 5.573415  | -2.977595 |
| H | 4.296869   | 6.524291  | -4.896543 |
| H | 5.369578   | 7.705915  | -4.179157 |
| H | 7.660133   | 9.040617  | -4.879381 |
| H | 7.556714   | 11.164807 | -3.627719 |

conformer\_13

|   |           |           |           |
|---|-----------|-----------|-----------|
| F | -2.882050 | 5.823134  | -2.369540 |
| C | -2.642168 | 6.957440  | -1.709911 |
| F | -2.218817 | 7.907286  | -2.545304 |
| F | -3.792360 | 7.368763  | -1.180000 |
| O | -1.724351 | 6.766399  | -0.635101 |
| C | -0.474785 | 6.231678  | -0.873631 |
| C | 0.080634  | 6.025576  | -2.144043 |
| C | 1.352332  | 5.471753  | -2.275203 |
| C | 2.082408  | 5.094242  | -1.141066 |
| C | 3.473837  | 4.517269  | -1.297074 |
| N | 3.854677  | 3.481372  | -0.495955 |
| C | 2.892549  | 2.450979  | -0.050392 |
| C | 2.844088  | 1.365207  | -1.153694 |
| C | 4.233030  | 0.732978  | -1.448795 |
| C | 4.594807  | -0.333334 | -0.392366 |
| C | 4.222524  | -1.695999 | -0.592800 |
| N | 3.591703  | -2.132690 | -1.721271 |
| C | 3.241564  | -3.440654 | -1.788675 |
| C | 3.456494  | -4.366963 | -0.769066 |
| O | 2.983087  | -5.648333 | -0.965703 |
| C | 3.133061  | -6.614399 | 0.087759  |
| C | 2.484846  | -7.960037 | -0.290950 |
| N | 1.729826  | -8.025836 | -1.398213 |
| C | 1.047696  | -9.229825 | -1.900248 |
| C | -0.175160 | -9.669580 | -1.065798 |
| O | -1.204866 | -8.681103 | -1.134650 |
| C | -2.238321 | -8.811749 | -0.151735 |
| C | -1.819718 | -8.235518 | 1.217779  |
| O | -1.453776 | -6.868447 | 1.049010  |
| C | -0.827386 | -6.266378 | 2.190573  |
| C | -0.303149 | -4.863197 | 1.828983  |
| N | -0.743978 | -4.327495 | 0.683211  |
| C | -0.361625 | -3.042564 | 0.080108  |
| C | -0.864680 | -2.938331 | -1.417219 |
| C | -0.436337 | -4.188100 | -2.231597 |
| C | -0.255453 | -1.693139 | -2.109752 |
| C | -2.409045 | -2.847899 | -1.539000 |
| C | -0.745162 | -1.833554 | 0.999348  |
| N | 0.226525  | -1.031308 | 1.512205  |
| C | -0.069719 | 0.161696  | 2.349436  |
| C | -0.311957 | 1.465946  | 1.539895  |
| N | -0.969957 | 1.367562  | 0.376128  |
| C | -1.309858 | 2.471820  | -0.521604 |
| C | -2.695677 | 3.046505  | -0.257797 |
| C | -2.878535 | 3.988437  | 0.757374  |
| C | -4.128437 | 4.568614  | 0.954899  |
| C | -5.202232 | 4.220841  | 0.132480  |
| C | -6.532991 | 4.860615  | 0.344352  |
| C | -7.240905 | 5.166790  | 1.516406  |
| C | -6.860053 | 4.881495  | 2.953664  |

|   |           |            |           |
|---|-----------|------------|-----------|
| N | -8.401121 | 5.775231   | 1.343744  |
| C | -8.668588 | 5.971349   | 0.080614  |
| S | -7.470508 | 5.405226   | -1.025568 |
| C | -5.017073 | 3.281184   | -0.885678 |
| C | -3.767497 | 2.698628   | -1.084013 |
| O | 0.007073  | 2.558883   | 2.008993  |
| C | 1.114331  | 0.237034   | 3.351745  |
| C | 1.815996  | -1.108239  | 3.249975  |
| O | 1.120415  | -2.035129  | 4.070152  |
| C | 1.614821  | -1.438453  | 1.765515  |
| O | -1.940789 | -1.565699  | 1.156060  |
| O | 0.498007  | -4.289936  | 2.571681  |
| O | 2.666041  | -8.943446  | 0.428009  |
| C | 4.127664  | -3.930874  | 0.381678  |
| C | 4.531020  | -2.581547  | 0.486397  |
| N | 5.161860  | -2.161172  | 1.618953  |
| C | 5.481072  | -0.844524  | 1.678284  |
| N | 5.218123  | 0.091423   | 0.737250  |
| C | 5.299271  | 1.856364   | -1.624854 |
| C | 5.241307  | 2.977589   | -0.553757 |
| O | 4.234034  | 5.028599   | -2.126617 |
| C | 1.531823  | 5.320304   | 0.128350  |
| C | 0.266321  | 5.886065   | 0.253482  |
| H | -0.452371 | 6.290931   | -3.044455 |
| H | 1.762446  | 5.330711   | -3.267302 |
| H | 1.917144  | 2.843139   | 0.232445  |
| H | 3.271230  | 2.030338   | 0.883010  |
| H | 2.452756  | 1.827310   | -2.061881 |
| H | 2.119119  | 0.592514   | -0.892901 |
| H | 4.166808  | 0.247682   | -2.424205 |
| H | 2.750559  | -3.749129  | -2.700612 |
| H | 2.651752  | -6.263178  | 1.001796  |
| H | 4.190676  | -6.793518  | 0.287467  |
| H | 1.622518  | -7.169603  | -1.926464 |
| H | 1.750582  | -10.061157 | -1.992062 |
| H | 0.710947  | -9.021283  | -2.917200 |
| H | 0.140754  | -9.849292  | -0.037488 |
| H | -0.562158 | -10.616981 | -1.444988 |
| H | -2.567891 | -9.848428  | -0.057616 |
| H | -3.104560 | -8.254205  | -0.509935 |
| H | -0.987393 | -8.811929  | 1.624191  |
| H | -2.643340 | -8.318477  | 1.928854  |
| H | 0.016553  | -6.868320  | 2.532416  |
| H | -1.541429 | -6.169028  | 3.009381  |
| H | -1.396880 | -4.888448  | 0.153725  |
| H | 0.721663  | -3.088781  | -0.004440 |
| H | -0.939586 | -5.094909  | -1.892735 |
| H | -0.675651 | -4.083172  | -3.290855 |
| H | 0.633684  | -4.371144  | -2.162419 |
| H | -0.547246 | -0.762507  | -1.623006 |



|   |           |           |           |
|---|-----------|-----------|-----------|
| H | 0.833592  | -1.730283 | -2.125273 |
| H | -0.581964 | -1.612988 | -3.147788 |
| H | -2.800916 | -1.896809 | -1.179237 |
| H | -2.733447 | -2.923875 | -2.578120 |
| H | -2.910855 | -3.644750 | -0.989162 |
| H | -1.027084 | 0.040283  | 2.859866  |
| H | -1.368847 | 0.464629  | 0.158081  |
| H | -1.240463 | 2.129959  | -1.556351 |
| H | -0.580403 | 3.280587  | -0.441077 |
| H | -2.049852 | 4.276873  | 1.389606  |
| H | -4.254480 | 5.303810  | 1.737171  |
| H | -6.017363 | 4.194834  | 3.030400  |
| H | -6.578867 | 5.791302  | 3.484450  |
| H | -7.677413 | 4.423637  | 3.512463  |
| H | -9.570968 | 6.453085  | -0.271517 |
| H | -5.839638 | 3.000974  | -1.528830 |
| H | -3.637670 | 1.982387  | -1.883866 |
| H | 0.809415  | 0.503985  | 4.364600  |
| H | 1.843067  | 0.989674  | 3.042408  |
| H | 2.872652  | -1.099474 | 3.528351  |
| H | 1.022610  | -2.871636 | 3.575632  |
| H | 2.285521  | -0.790337 | 1.200868  |
| H | 1.888641  | -2.468326 | 1.543775  |
| H | 4.345067  | -4.586775 | 1.209514  |
| H | 5.984857  | -0.501070 | 2.573844  |
| H | 5.153339  | 2.333307  | -2.595754 |
| H | 6.301197  | 1.426745  | -1.664500 |
| H | 5.483555  | 2.584326  | 0.434051  |
| H | 5.969923  | 3.778798  | -0.696813 |
| H | 2.079574  | 5.067435  | 1.027268  |
| H | -0.149466 | 6.049240  | 1.237629  |

#### conformer\_14

|   |          |           |           |
|---|----------|-----------|-----------|
| F | 2.470427 | 13.636909 | -5.258042 |
| C | 2.727525 | 12.369173 | -4.940650 |
| F | 3.641401 | 12.370116 | -3.967317 |
| F | 1.590600 | 11.818135 | -4.509615 |
| O | 3.212057 | 11.724944 | -6.115073 |
| C | 3.533666 | 10.402228 | -5.960729 |
| C | 2.571145 | 9.422291  | -6.189273 |
| C | 2.902257 | 8.076751  | -6.048728 |
| C | 4.198418 | 7.700790  | -5.668475 |
| C | 4.539474 | 6.229268  | -5.546295 |
| N | 5.422487 | 5.823115  | -4.587257 |
| C | 5.816637 | 4.400790  | -4.533524 |
| C | 4.766881 | 3.647692  | -3.678512 |
| C | 4.586609 | 4.277408  | -2.273967 |
| C | 3.504452 | 3.549745  | -1.455926 |
| C | 3.804255 | 2.332679  | -0.774137 |
| N | 5.043177 | 1.757434  | -0.789031 |

|   |           |           |           |
|---|-----------|-----------|-----------|
| C | 5.211916  | 0.598184  | -0.104663 |
| C | 4.203897  | -0.050068 | 0.607999  |
| O | 4.541143  | -1.231661 | 1.238888  |
| C | 3.561750  | -2.008002 | 1.958008  |
| C | 2.820156  | -3.007952 | 1.044461  |
| N | 2.836267  | -2.794766 | -0.278730 |
| C | 2.243244  | -3.665525 | -1.301592 |
| C | 0.702109  | -3.678471 | -1.352101 |
| O | 0.194084  | -2.377160 | -1.635723 |
| C | -1.175841 | -2.374488 | -2.034857 |
| C | -1.777312 | -0.955330 | -1.968833 |
| O | -2.036318 | -0.486006 | -0.641002 |
| C | -0.888788 | -0.195886 | 0.178414  |
| C | -0.703507 | -1.239350 | 1.298109  |
| N | -1.602923 | -2.225353 | 1.384028  |
| C | -1.556902 | -3.388938 | 2.280887  |
| C | -2.487997 | -3.221810 | 3.549558  |
| C | -3.968026 | -2.988732 | 3.147060  |
| C | -2.046370 | -1.991238 | 4.380478  |
| C | -2.433257 | -4.450067 | 4.492134  |
| C | -1.871437 | -4.653601 | 1.424074  |
| N | -1.297206 | -5.851656 | 1.719624  |
| C | -1.567361 | -7.097657 | 0.952142  |
| C | -2.922309 | -7.784923 | 1.284161  |
| N | -3.996089 | -6.994531 | 1.385000  |
| C | -5.356164 | -7.408593 | 1.706654  |
| C | -5.982330 | -6.443950 | 2.701042  |
| C | -5.716566 | -6.581395 | 4.065634  |
| C | -6.288337 | -5.697916 | 4.977683  |
| C | -7.138204 | -4.682464 | 4.534132  |
| C | -7.735467 | -3.733260 | 5.516594  |
| C | -7.184070 | -3.075473 | 6.626368  |
| C | -5.759485 | -3.111085 | 7.135850  |
| N | -8.015033 | -2.310263 | 7.311849  |
| C | -9.217297 | -2.313197 | 6.802193  |
| S | -9.421406 | -3.292496 | 5.395468  |
| C | -7.418910 | -4.560551 | 3.170719  |
| C | -6.847891 | -5.441542 | 2.255979  |
| O | -3.014837 | -9.009424 | 1.345608  |
| C | -0.316867 | -7.981064 | 1.189272  |
| C | 0.735625  | -7.044434 | 1.757321  |
| O | 1.352404  | -6.371606 | 0.674751  |
| C | -0.121163 | -6.069049 | 2.577492  |
| O | -2.727144 | -4.558972 | 0.534153  |
| O | 0.242809  | -1.138596 | 2.080277  |
| O | 2.250980  | -3.982250 | 1.536886  |
| C | 2.933523  | 0.536432  | 0.626039  |
| C | 2.709545  | 1.744378  | -0.068291 |
| N | 1.466548  | 2.301953  | -0.047204 |
| C | 1.313918  | 3.456087  | -0.740958 |

|   |            |           |           |
|---|------------|-----------|-----------|
| N | 2.265986   | 4.107774  | -1.447577 |
| C | 4.410476   | 5.820003  | -2.368470 |
| C | 5.491851   | 6.473633  | -3.260871 |
| O | 4.019341   | 5.438714  | -6.337657 |
| C | 5.170193   | 8.696753  | -5.481047 |
| C | 4.835623   | 10.041313 | -5.623180 |
| H | 1.570994   | 9.708599  | -6.479324 |
| H | 2.146975   | 7.324097  | -6.235434 |
| H | 6.800169   | 4.348802  | -4.063305 |
| H | 5.975728   | 3.982087  | -5.530334 |
| H | 5.113741   | 2.618133  | -3.580540 |
| H | 3.815590   | 3.617759  | -4.213769 |
| H | 5.507432   | 4.117524  | -1.709872 |
| H | 6.203439   | 0.169830  | -0.133543 |
| H | 2.854424   | -1.398957 | 2.519061  |
| H | 4.104129   | -2.586099 | 2.705757  |
| H | 3.307102   | -1.957671 | -0.589693 |
| H | 2.615809   | -4.686760 | -1.192350 |
| H | 2.606084   | -3.321094 | -2.270994 |
| H | 0.293801   | -4.023215 | -0.402226 |
| H | 0.386964   | -4.393929 | -2.114599 |
| H | -1.770725  | -3.031281 | -1.398621 |
| H | -1.253649  | -2.762448 | -3.051681 |
| H | -2.730177  | -0.957222 | -2.498982 |
| H | -1.141144  | -0.245029 | -2.499783 |
| H | -1.037729  | 0.778674  | 0.642795  |
| H | 0.032693   | -0.137569 | -0.402656 |
| H | -2.331550  | -2.260929 | 0.683863  |
| H | -0.527793  | -3.461528 | 2.623016  |
| H | -4.370844  | -3.819235 | 2.567226  |
| H | -4.611829  | -2.885765 | 4.021904  |
| H | -4.094505  | -2.080667 | 2.556901  |
| H | -0.993071  | -2.051215 | 4.658061  |
| H | -2.188107  | -1.057221 | 3.835995  |
| H | -2.619815  | -1.898308 | 5.303898  |
| H | -1.417242  | -4.650940 | 4.832857  |
| H | -3.040872  | -4.296935 | 5.384473  |
| H | -2.820487  | -5.352378 | 4.017099  |
| H | -1.698395  | -6.858508 | -0.104255 |
| H | -3.854310  | -6.020304 | 1.136012  |
| H | -5.389305  | -8.422019 | 2.116920  |
| H | -5.949499  | -7.453976 | 0.791221  |
| H | -5.055759  | -7.361244 | 4.416720  |
| H | -6.077041  | -5.804926 | 6.031489  |
| H | -5.358123  | -2.109598 | 7.294755  |
| H | -5.683670  | -3.644869 | 8.083214  |
| H | -5.086251  | -3.602563 | 6.435687  |
| H | -10.039792 | -1.750142 | 7.215947  |
| H | -8.071559  | -3.775337 | 2.818318  |
| H | -7.066488  | -5.329348 | 1.203619  |

|   |           |           |           |
|---|-----------|-----------|-----------|
| H | 0.006732  | -8.519326 | 0.297547  |
| H | -0.512499 | -8.738252 | 1.951425  |
| H | 1.506089  | -7.542029 | 2.350598  |
| H | 1.701919  | -5.522806 | 1.006439  |
| H | -0.424460 | -6.592801 | 3.485261  |
| H | 0.463788  | -5.197748 | 2.865555  |
| H | 2.102951  | 0.105528  | 1.154997  |
| H | 0.328616  | 3.903346  | -0.732014 |
| H | 4.496407  | 6.258024  | -1.373196 |
| H | 3.424178  | 6.085602  | -2.753822 |
| H | 5.446071  | 7.561497  | -3.284324 |
| H | 6.485667  | 6.273126  | -2.855933 |
| H | 6.192510  | 8.436533  | -5.242194 |
| H | 5.583581  | 10.807372 | -5.480859 |

conformer\_15

|   |           |           |           |
|---|-----------|-----------|-----------|
| F | -2.153370 | 4.030754  | 3.428912  |
| C | -1.159723 | 4.696546  | 4.057556  |
| F | -1.719089 | 5.493957  | 4.997744  |
| F | -0.346374 | 3.818375  | 4.685199  |
| O | -0.435088 | 5.510764  | 3.147212  |
| C | 0.164443  | 4.901753  | 2.081888  |
| C | 0.263649  | 3.526059  | 1.859936  |
| C | 0.920477  | 3.041425  | 0.722142  |
| C | 1.462908  | 3.932808  | -0.209825 |
| C | 2.208262  | 3.437600  | -1.393094 |
| N | 1.624435  | 2.468088  | -2.215100 |
| C | 0.170618  | 2.355220  | -2.390420 |
| C | -0.247979 | 0.925489  | -2.718055 |
| C | 0.535592  | 0.396491  | -3.927108 |
| C | 0.133718  | -1.007101 | -4.355173 |
| C | 0.283688  | -2.116046 | -3.518924 |
| N | 0.742549  | -2.050919 | -2.238748 |
| C | 0.886358  | -3.207261 | -1.547903 |
| C | 0.587031  | -4.450341 | -2.072561 |
| O | 0.746928  | -5.663757 | -1.469707 |
| C | 1.142683  | -5.651596 | -0.099760 |
| C | 1.346667  | -7.082202 | 0.413038  |
| N | 1.896473  | -7.135878 | 1.675130  |
| C | 2.355726  | -8.367991 | 2.294171  |
| C | 3.794891  | -8.731405 | 1.903279  |
| O | 4.721747  | -7.779838 | 2.447343  |
| C | 5.142591  | -6.778709 | 1.506309  |
| C | 5.124363  | -5.409150 | 2.188871  |
| O | 3.755791  | -5.003822 | 2.350046  |
| C | 3.643840  | -3.791999 | 3.099954  |
| C | 2.162531  | -3.448128 | 3.294841  |
| N | 1.934578  | -2.262512 | 3.960384  |
| C | 0.572293  | -1.752365 | 4.164097  |
| C | 0.472052  | -0.774381 | 5.380138  |

|   |           |           |           |
|---|-----------|-----------|-----------|
| C | 1.311976  | 0.504920  | 5.204101  |
| C | 0.956471  | -1.497124 | 6.656920  |
| C | -0.994825 | -0.359956 | 5.608229  |
| C | 0.082852  | -1.131741 | 2.821588  |
| N | -1.105105 | -1.575034 | 2.283213  |
| C | -1.641508 | -1.006523 | 1.043969  |
| C | -2.448033 | 0.283747  | 1.328864  |
| N | -2.755436 | 1.019469  | 0.205883  |
| C | -3.659968 | 2.149948  | 0.262948  |
| C | -3.368424 | 3.143684  | -0.830396 |
| C | -2.774987 | 4.375383  | -0.528087 |
| C | -2.489762 | 5.298350  | -1.539325 |
| C | -2.790286 | 5.010654  | -2.876775 |
| C | -2.482377 | 5.983472  | -3.929674 |
| C | -1.302428 | 6.658871  | -4.221948 |
| C | 0.004810  | 6.530494  | -3.520201 |
| N | -1.377705 | 7.540741  | -5.295338 |
| C | -2.593778 | 7.526502  | -5.796167 |
| S | -3.709368 | 6.479985  | -5.031932 |
| C | -3.382164 | 3.775586  | -3.178428 |
| C | -3.671594 | 2.853324  | -2.166594 |
| O | -2.815938 | 0.606017  | 2.458758  |
| C | -2.555303 | -2.100933 | 0.502007  |
| C | -3.115163 | -2.745851 | 1.770475  |
| O | -3.535966 | -4.073589 | 1.491063  |
| C | -1.931959 | -2.685926 | 2.744297  |
| O | 0.758159  | -0.279274 | 2.233663  |
| O | 1.249534  | -4.174137 | 2.899653  |
| O | 1.069928  | -8.089790 | -0.236665 |
| C | 0.095086  | -4.485267 | -3.375970 |
| C | -0.072219 | -3.330247 | -4.127379 |
| N | -0.545110 | -3.438928 | -5.381132 |
| C | -0.665264 | -2.304486 | -6.078160 |
| N | -0.342956 | -1.086816 | -5.629503 |
| C | 2.048007  | 0.531694  | -3.696427 |
| C | 2.420263  | 1.966353  | -3.335320 |
| O | 3.339536  | 3.887556  | -1.580429 |
| C | 1.383644  | 5.308226  | 0.016772  |
| C | 0.732111  | 5.786011  | 1.156211  |
| H | -0.145699 | 2.792933  | 2.550436  |
| H | 1.012668  | 1.966768  | 0.576083  |
| H | -0.105954 | 3.029358  | -3.209797 |
| H | -0.368518 | 2.699785  | -1.508745 |
| H | -1.324276 | 0.892084  | -2.922268 |
| H | -0.073579 | 0.303543  | -1.833781 |
| H | 0.287894  | 1.059352  | -4.770606 |
| H | 1.271695  | -3.071486 | -0.541838 |
| H | 0.361755  | -5.182905 | 0.509629  |
| H | 2.098602  | -5.126235 | 0.010508  |
| H | 2.228982  | -6.263916 | 2.093084  |

|   |           |           |           |
|---|-----------|-----------|-----------|
| H | 1.678677  | -9.180766 | 2.011558  |
| H | 2.288384  | -8.211569 | 3.375802  |
| H | 3.917793  | -8.840059 | 0.819525  |
| H | 4.040551  | -9.696949 | 2.358188  |
| H | 4.497771  | -6.759800 | 0.620853  |
| H | 6.161758  | -7.030884 | 1.198002  |
| H | 5.638072  | -4.670843 | 1.564417  |
| H | 5.604647  | -5.468137 | 3.171865  |
| H | 4.129049  | -2.976363 | 2.553694  |
| H | 4.100812  | -3.918241 | 4.087179  |
| H | 2.692735  | -1.585898 | 3.954003  |
| H | -0.041171 | -2.629100 | 4.395015  |
| H | 0.959620  | 1.111087  | 4.364123  |
| H | 1.250656  | 1.137207  | 6.098128  |
| H | 2.370631  | 0.280546  | 5.041783  |
| H | 0.390997  | -2.420262 | 6.827053  |
| H | 2.018189  | -1.759649 | 6.594625  |
| H | 0.829816  | -0.864059 | 7.542927  |
| H | -1.636116 | -1.235133 | 5.758087  |
| H | -1.092833 | 0.274149  | 6.497213  |
| H | -1.388554 | 0.209810  | 4.761296  |
| H | -0.829559 | -0.766418 | 0.349163  |
| H | -2.605944 | 0.598835  | -0.704408 |
| H | -3.599389 | 2.626869  | 1.247998  |
| H | -4.681574 | 1.766520  | 0.157149  |
| H | -2.532752 | 4.630789  | 0.501902  |
| H | -2.040924 | 6.250986  | -1.263268 |
| H | 0.224359  | 5.485903  | -3.282844 |
| H | 0.820074  | 6.907280  | -4.146250 |
| H | -0.004615 | 7.108696  | -2.591351 |
| H | -2.883714 | 8.138123  | -6.641802 |
| H | -3.621876 | 3.511741  | -4.207386 |
| H | -4.135814 | 1.904773  | -2.432908 |
| H | -1.975426 | -2.837200 | -0.068887 |
| H | -3.352805 | -1.737584 | -0.153827 |
| H | -3.966576 | -2.168755 | 2.149671  |
| H | -3.903280 | -4.435539 | 2.325347  |
| H | -2.265864 | -2.506701 | 3.770029  |
| H | -1.341756 | -3.607311 | 2.723736  |
| H | -0.155254 | -5.445280 | -3.823920 |
| H | -1.050256 | -2.378197 | -7.090612 |
| H | 2.600232  | 0.224944  | -4.593131 |
| H | 2.375562  | -0.127934 | -2.884249 |
| H | 3.487274  | 2.008600  | -3.090067 |
| H | 2.254260  | 2.637905  | -4.186468 |
| H | 1.828718  | 6.011555  | -0.683433 |
| H | 0.672104  | 6.860716  | 1.321636  |

conformer\_16

|   |           |          |           |
|---|-----------|----------|-----------|
| F | -1.249478 | 8.581861 | -6.247568 |
|---|-----------|----------|-----------|

|   |           |           |           |
|---|-----------|-----------|-----------|
| C | -0.552686 | 7.778350  | -7.081347 |
| F | -1.087107 | 7.896784  | -8.319937 |
| F | 0.733844  | 8.188070  | -7.141037 |
| O | -0.641151 | 6.418646  | -6.678448 |
| C | -0.149741 | 6.081193  | -5.449467 |
| C | -0.275291 | 4.722331  | -5.130476 |
| C | 0.182118  | 4.228818  | -3.906483 |
| C | 0.783819  | 5.099394  | -2.997492 |
| C | 1.240495  | 4.576466  | -1.691935 |
| N | 2.583461  | 4.728659  | -1.337150 |
| C | 3.662764  | 4.864018  | -2.321961 |
| C | 4.235729  | 3.484511  | -2.651515 |
| C | 4.658897  | 2.737226  | -1.368331 |
| C | 5.193844  | 1.336707  | -1.633276 |
| C | 4.409203  | 0.341118  | -2.221467 |
| N | 3.119648  | 0.522491  | -2.617676 |
| C | 2.471649  | -0.516510 | -3.196282 |
| C | 3.048504  | -1.755861 | -3.397460 |
| O | 2.472511  | -2.852132 | -3.970495 |
| C | 1.188476  | -2.663859 | -4.564156 |
| C | 0.715607  | -3.958601 | -5.236460 |
| N | -0.576248 | -3.892161 | -5.715335 |
| C | -1.263316 | -5.036052 | -6.299514 |
| C | -1.935152 | -5.913044 | -5.239263 |
| O | -3.005373 | -5.173991 | -4.629207 |
| C | -3.692296 | -5.962023 | -3.646508 |
| C | -4.874086 | -5.161295 | -3.089643 |
| O | -4.477118 | -3.963758 | -2.404201 |
| C | -3.921437 | -4.212563 | -1.115117 |
| C | -3.806020 | -2.926554 | -0.279521 |
| N | -3.392850 | -3.152271 | 1.018707  |
| C | -3.099008 | -2.046747 | 1.943277  |
| C | -3.395909 | -2.443201 | 3.428998  |
| C | -3.265295 | -1.221750 | 4.357476  |
| C | -2.454825 | -3.547784 | 3.945187  |
| C | -4.850720 | -2.952299 | 3.548419  |
| C | -1.616364 | -1.626989 | 1.689025  |
| N | -1.261604 | -0.301210 | 1.854764  |
| C | 0.134918  | 0.122938  | 1.668822  |
| C | 1.074160  | -0.448538 | 2.751054  |
| N | 0.631184  | -0.278033 | 4.041650  |
| C | 1.401654  | -0.649432 | 5.206487  |
| C | 0.492019  | -1.129719 | 6.307061  |
| C | 0.253220  | -2.498364 | 6.483916  |
| C | -0.619806 | -2.945261 | 7.480683  |
| C | -1.275451 | -2.033243 | 8.317238  |
| C | -2.193201 | -2.510664 | 9.352698  |
| C | -3.334386 | -3.297213 | 9.253076  |
| C | -3.940041 | -3.839086 | 8.005358  |
| N | -3.959822 | -3.582358 | 10.462565 |

|   |           |           |           |
|---|-----------|-----------|-----------|
| C | -3.295911 | -3.017099 | 11.447892 |
| S | -1.905312 | -2.124503 | 11.004364 |
| C | -1.043690 | -0.663528 | 8.133125  |
| C | -0.169796 | -0.215639 | 7.137207  |
| O | 2.192386  | -0.889132 | 2.482341  |
| C | 0.088263  | 1.652261  | 1.718220  |
| C | -1.280368 | 1.972162  | 1.140075  |
| O | -1.220130 | 1.915639  | -0.287397 |
| C | -2.164712 | 0.840328  | 1.677511  |
| O | -0.760692 | -2.475884 | 1.407535  |
| O | -4.070779 | -1.804223 | -0.708316 |
| O | 1.412451  | -4.967425 | -5.345235 |
| C | 4.362108  | -1.921316 | -2.960503 |
| C | 5.075525  | -0.884838 | -2.373024 |
| N | 6.345927  | -1.106564 | -1.991139 |
| C | 6.996083  | -0.076873 | -1.437881 |
| N | 6.483164  | 1.142041  | -1.237762 |
| C | 3.553046  | 2.742423  | -0.293162 |
| C | 3.026389  | 4.158197  | -0.068935 |
| O | 0.401439  | 4.034614  | -0.971067 |
| C | 0.899505  | 6.460250  | -3.296124 |
| C | 0.437805  | 6.948153  | -4.524353 |
| H | -0.737473 | 4.036883  | -5.839574 |
| H | 0.070972  | 3.172433  | -3.672078 |
| H | 4.434893  | 5.508732  | -1.886244 |
| H | 3.319822  | 5.341540  | -3.241473 |
| H | 5.095308  | 3.592722  | -3.324149 |
| H | 3.476513  | 2.920471  | -3.203387 |
| H | 5.495082  | 3.316000  | -0.946580 |
| H | 1.450704  | -0.290114 | -3.488667 |
| H | 1.235367  | -1.888599 | -5.338360 |
| H | 0.455715  | -2.402186 | -3.791538 |
| H | -1.151135 | -3.090641 | -5.466000 |
| H | -0.541047 | -5.629051 | -6.870083 |
| H | -2.011658 | -4.630055 | -6.988130 |
| H | -1.215530 | -6.213723 | -4.469539 |
| H | -2.347332 | -6.807910 | -5.718742 |
| H | -2.988554 | -6.229650 | -2.852168 |
| H | -4.068330 | -6.877412 | -4.116993 |
| H | -5.490375 | -5.781307 | -2.428955 |
| H | -5.505733 | -4.835157 | -3.923022 |
| H | -2.915626 | -4.630273 | -1.225417 |
| H | -4.557020 | -4.912937 | -0.560840 |
| H | -2.907381 | -4.029053 | 1.189918  |
| H | -3.763344 | -1.222658 | 1.669460  |
| H | -3.919237 | -0.405587 | 4.032143  |
| H | -3.545112 | -1.473287 | 5.386680  |
| H | -2.240188 | -0.846975 | 4.390461  |
| H | -2.530814 | -4.460260 | 3.345270  |
| H | -1.409541 | -3.223851 | 3.936163  |



|   |           |           |           |
|---|-----------|-----------|-----------|
| H | -2.699915 | -3.820313 | 4.978211  |
| H | -5.005152 | -3.878122 | 2.983779  |
| H | -5.111911 | -3.164159 | 4.591888  |
| H | -5.560918 | -2.206413 | 3.173908  |
| H | 0.467651  | -0.234627 | 0.686252  |
| H | -0.249235 | 0.200958  | 4.193935  |
| H | 1.959899  | 0.235350  | 5.533312  |
| H | 2.139362  | -1.417116 | 4.947267  |
| H | 0.743546  | -3.229695 | 5.842738  |
| H | -0.775806 | -4.016327 | 7.599006  |
| H | -3.324792 | -4.648746 | 7.601287  |
| H | -4.940619 | -4.238525 | 8.199293  |
| H | -4.034341 | -3.055857 | 7.247560  |
| H | -3.601576 | -3.104843 | 12.483383 |
| H | -1.548168 | 0.072323  | 8.757349  |
| H | -0.013412 | 0.855051  | 7.011955  |
| H | 0.912494  | 2.084581  | 1.145631  |
| H | 0.154085  | 2.027536  | 2.745822  |
| H | -1.655500 | 2.958965  | 1.426028  |
| H | -0.663019 | 2.682906  | -0.564951 |
| H | -2.563063 | 1.093859  | 2.663851  |
| H | -2.975609 | 0.597107  | 0.987007  |
| H | 4.849074  | -2.885528 | -3.094436 |
| H | 8.022672  | -0.243842 | -1.126309 |
| H | 3.939548  | 2.338605  | 0.650482  |
| H | 2.719646  | 2.097064  | -0.593245 |
| H | 2.205657  | 4.149108  | 0.655476  |
| H | 3.812900  | 4.804795  | 0.337604  |
| H | 1.344897  | 7.146122  | -2.578010 |
| H | 0.553162  | 8.012092  | -4.715459 |

conformer\_17

|   |          |           |           |
|---|----------|-----------|-----------|
| F | 6.928457 | 13.755523 | 0.836539  |
| C | 6.564758 | 13.083446 | 1.951224  |
| F | 6.960768 | 13.808268 | 3.024348  |
| F | 5.218762 | 12.970361 | 1.997597  |
| O | 7.190328 | 11.808792 | 2.010471  |
| C | 6.920443 | 10.915762 | 1.012950  |
| C | 7.579099 | 9.686258  | 1.144750  |
| C | 7.400635 | 8.673611  | 0.199267  |
| C | 6.543839 | 8.885516  | -0.883817 |
| C | 6.366945 | 7.838379  | -1.916631 |
| N | 5.938670 | 6.566579  | -1.522407 |
| C | 5.798728 | 5.551616  | -2.564609 |
| C | 5.963287 | 4.133335  | -2.020783 |
| C | 5.144631 | 3.844738  | -0.748316 |
| C | 3.670435 | 3.539707  | -1.006780 |
| C | 2.982111 | 2.688912  | -0.138004 |
| N | 3.554195 | 2.091301  | 0.943182  |
| C | 2.782446 | 1.282085  | 1.708835  |

|   |            |           |           |
|---|------------|-----------|-----------|
| C | 1.447591   | 1.033403  | 1.448777  |
| O | 0.602463   | 0.227910  | 2.153070  |
| C | 1.144332   | -0.438131 | 3.294688  |
| C | 0.058312   | -1.320770 | 3.920503  |
| N | 0.536308   | -2.322448 | 4.736855  |
| C | -0.343881  | -3.284084 | 5.384759  |
| C | -0.819515  | -4.400935 | 4.447727  |
| O | 0.279727   | -5.262779 | 4.110408  |
| C | -0.172539  | -6.408767 | 3.372525  |
| C | 1.007527   | -7.333809 | 3.057861  |
| O | 1.799721   | -6.894949 | 1.943465  |
| C | 2.610921   | -5.754605 | 2.223448  |
| C | 2.021043   | -4.450370 | 1.674525  |
| N | 1.307609   | -4.610501 | 0.509951  |
| C | 0.524974   | -3.542834 | -0.126985 |
| C | 1.117076   | -3.148046 | -1.517932 |
| C | 1.100792   | -4.325810 | -2.510621 |
| C | 2.579757   | -2.679794 | -1.342397 |
| C | 0.336996   | -1.975771 | -2.140888 |
| C | -0.940311  | -4.071624 | -0.180973 |
| N | -1.987267  | -3.178104 | -0.100004 |
| C | -3.374335  | -3.660091 | -0.161278 |
| C | -3.780339  | -4.122726 | -1.576652 |
| N | -4.945859  | -4.856732 | -1.607364 |
| C | -5.426052  | -5.457979 | -2.831223 |
| C | -6.837394  | -5.955575 | -2.669972 |
| C | -7.919107  | -5.075351 | -2.802618 |
| C | -9.230506  | -5.530058 | -2.633201 |
| C | -9.486073  | -6.870853 | -2.318301 |
| C | -10.862588 | -7.339741 | -2.153762 |
| C | -11.935803 | -7.305243 | -3.035521 |
| C | -11.928126 | -6.784504 | -4.430736 |
| N | -13.124960 | -7.825812 | -2.535721 |
| C | -12.940612 | -8.242984 | -1.301408 |
| S | -11.364115 | -8.043432 | -0.666513 |
| C | -8.402760  | -7.748351 | -2.177126 |
| C | -7.090775  | -7.294611 | -2.346969 |
| O | -3.152675  | -3.828588 | -2.594340 |
| C | -4.236978  | -2.465395 | 0.263587  |
| C | -3.301015  | -1.657678 | 1.148601  |
| O | -3.288227  | -2.243529 | 2.453773  |
| C | -1.945323  | -1.826900 | 0.456280  |
| O | -1.162668  | -5.280517 | -0.336780 |
| O | 2.218942   | -3.358076 | 2.201436  |
| O | -1.146957  | -1.147606 | 3.728242  |
| C | 0.888370   | 1.665579  | 0.339030  |
| C | 1.633656   | 2.503715  | -0.478383 |
| N | 1.035583   | 3.083722  | -1.533272 |
| C | 1.795520   | 3.887794  | -2.285407 |
| N | 3.089862   | 4.151240  | -2.072066 |

|   |            |           |           |
|---|------------|-----------|-----------|
| C | 5.321382   | 4.981458  | 0.269671  |
| C | 5.090210   | 6.357635  | -0.343441 |
| O | 6.642319   | 8.133594  | -3.079921 |
| C | 5.896926   | 10.114606 | -1.035141 |
| C | 6.080104   | 11.125320 | -0.083498 |
| H | 8.243992   | 9.512093  | 1.989649  |
| H | 7.931516   | 7.730816  | 0.311190  |
| H | 6.552710   | 5.716995  | -3.343173 |
| H | 4.823982   | 5.698476  | -3.040787 |
| H | 7.024472   | 3.997175  | -1.769886 |
| H | 5.735663   | 3.404142  | -2.807630 |
| H | 5.584564   | 2.934589  | -0.317735 |
| H | 3.307492   | 0.840334  | 2.550757  |
| H | 1.442953   | 0.295505  | 4.052618  |
| H | 1.996894   | -1.057821 | 3.006817  |
| H | 1.518088   | -2.578116 | 4.655931  |
| H | -1.210620  | -2.742723 | 5.778901  |
| H | 0.220484   | -3.706505 | 6.222624  |
| H | -1.242968  | -3.988032 | 3.525998  |
| H | -1.588375  | -4.987254 | 4.963784  |
| H | -0.654384  | -6.074375 | 2.447846  |
| H | -0.896410  | -6.954287 | 3.988083  |
| H | 0.611302   | -8.313577 | 2.771258  |
| H | 1.653101   | -7.477272 | 3.931863  |
| H | 3.569821   | -5.904093 | 1.715579  |
| H | 2.811594   | -5.648203 | 3.294877  |
| H | 1.095943   | -5.570240 | 0.237080  |
| H | 0.570921   | -2.673671 | 0.532696  |
| H | 0.079950   | -4.660842 | -2.721872 |
| H | 1.551100   | -4.037919 | -3.467968 |
| H | 1.666573   | -5.183185 | -2.130984 |
| H | 2.646066   | -1.854806 | -0.623978 |
| H | 3.226008   | -3.489737 | -0.987358 |
| H | 2.999175   | -2.326455 | -2.291582 |
| H | 0.319455   | -1.111656 | -1.468459 |
| H | 0.799098   | -1.648492 | -3.079825 |
| H | -0.694992  | -2.252938 | -2.375204 |
| H | -3.477008  | -4.495443 | 0.542652  |
| H | -5.295785  | -5.243397 | -0.735427 |
| H | -4.748879  | -6.279453 | -3.093514 |
| H | -5.367560  | -4.726406 | -3.645978 |
| H | -7.746973  | -4.025529 | -3.037308 |
| H | -10.049796 | -4.820612 | -2.739375 |
| H | -11.040438 | -7.127063 | -4.971741 |
| H | -12.809123 | -7.131459 | -4.980201 |
| H | -11.938147 | -5.690261 | -4.428418 |
| H | -13.732601 | -8.687971 | -0.711365 |
| H | -8.567667  | -8.798238 | -1.939376 |
| H | -6.267866  | -7.998176 | -2.226617 |
| H | -5.142226  | -2.796216 | 0.783104  |

|   |           |           |           |
|---|-----------|-----------|-----------|
| H | -4.536104 | -1.869091 | -0.607289 |
| H | -3.601832 | -0.610783 | 1.245350  |
| H | -2.611711 | -1.747361 | 2.974035  |
| H | -1.851493 | -1.129902 | -0.381493 |
| H | -1.111577 | -1.707847 | 1.145099  |
| H | -0.160888 | 1.499364  | 0.103679  |
| H | 1.323527  | 4.366316  | -3.138045 |
| H | 6.349592  | 4.943825  | 0.653831  |
| H | 4.658795  | 4.847802  | 1.132841  |
| H | 4.049004  | 6.477924  | -0.665569 |
| H | 5.263136  | 7.121156  | 0.417405  |
| H | 5.246257  | 10.291564 | -1.889435 |
| H | 5.550307  | 12.061621 | -0.240085 |

conformer\_18

|   |           |           |           |
|---|-----------|-----------|-----------|
| F | -5.975771 | 8.941005  | -5.159386 |
| C | -5.559258 | 10.114398 | -4.633834 |
| F | -4.847033 | 10.800262 | -5.555246 |
| F | -6.655632 | 10.846076 | -4.323337 |
| O | -4.802824 | 9.907510  | -3.448662 |
| C | -3.647335 | 9.185506  | -3.543943 |
| C | -3.118157 | 8.616057  | -4.704972 |
| C | -1.916443 | 7.899149  | -4.654382 |
| C | -1.248298 | 7.738308  | -3.437862 |
| C | 0.039253  | 7.006677  | -3.406863 |
| N | 0.182793  | 5.927935  | -2.527831 |
| C | 1.472468  | 5.240277  | -2.516411 |
| C | 1.754565  | 4.554960  | -1.180804 |
| C | 0.587579  | 3.704451  | -0.647460 |
| C | 0.460210  | 2.328823  | -1.298725 |
| C | -0.068568 | 1.267029  | -0.561402 |
| N | -0.459663 | 1.375419  | 0.736644  |
| C | -0.959919 | 0.273178  | 1.345597  |
| C | -1.107751 | -0.949476 | 0.714937  |
| O | -1.611937 | -2.101337 | 1.250429  |
| C | -2.041162 | -2.027308 | 2.609213  |
| C | -2.615117 | -3.381727 | 3.024608  |
| N | -3.895829 | -3.603419 | 2.576294  |
| C | -4.632591 | -4.831199 | 2.832300  |
| C | -4.240319 | -5.975944 | 1.893566  |
| O | -4.296445 | -5.519029 | 0.536219  |
| C | -4.312651 | -6.604185 | -0.399924 |
| C | -3.890630 | -6.081750 | -1.777163 |
| O | -2.468674 | -6.065302 | -1.979051 |
| C | -1.757585 | -5.151815 | -1.146533 |
| C | -0.930847 | -5.860012 | -0.059047 |
| N | 0.056013  | -5.079207 | 0.497936  |
| C | 0.995884  | -5.568038 | 1.517406  |
| C | 2.397310  | -5.910462 | 0.906650  |
| C | 3.365853  | -6.408356 | 1.996448  |

|   |           |           |           |
|---|-----------|-----------|-----------|
| C | 3.037365  | -4.697177 | 0.206351  |
| C | 2.256478  | -7.042727 | -0.134322 |
| C | 1.059741  | -4.465959 | 2.612220  |
| N | 1.177821  | -4.841233 | 3.934385  |
| C | 1.290062  | -3.822932 | 4.987737  |
| C | 2.664223  | -3.119829 | 4.924851  |
| N | 2.593128  | -1.763713 | 4.702003  |
| C | 3.759436  | -0.935714 | 4.484603  |
| C | 3.919847  | -0.604045 | 3.022734  |
| C | 4.654447  | -1.445025 | 2.177443  |
| C | 4.784495  | -1.148193 | 0.816731  |
| C | 4.180729  | -0.006820 | 0.273726  |
| C | 4.312322  | 0.288808  | -1.153561 |
| C | 3.970044  | -0.470416 | -2.265550 |
| C | 3.332898  | -1.815520 | -2.267271 |
| N | 4.256452  | 0.119076  | -3.492523 |
| C | 4.803535  | 1.299383  | -3.297706 |
| S | 5.015896  | 1.771550  | -1.667223 |
| C | 3.440542  | 0.829949  | 1.118993  |
| C | 3.305736  | 0.531608  | 2.478386  |
| O | 3.729961  | -3.728704 | 5.028823  |
| C | 1.139987  | -4.591069 | 6.305554  |
| C | 0.335379  | -5.822205 | 5.917094  |
| O | -1.062136 | -5.516318 | 5.933212  |
| C | 0.829348  | -6.142618 | 4.504335  |
| O | 1.049107  | -3.269515 | 2.298977  |
| O | -1.106054 | -7.034530 | 0.264632  |
| O | -1.995761 | -4.187367 | 3.719708  |
| C | -0.700327 | -1.026693 | -0.616006 |
| C | -0.170434 | 0.069237  | -1.284090 |
| N | 0.204238  | -0.069828 | -2.566932 |
| C | 0.701270  | 1.018264  | -3.166564 |
| N | 0.837895  | 2.221917  | -2.598419 |
| C | -0.726994 | 4.495016  | -0.730502 |
| C | -0.957285 | 5.104477  | -2.108775 |
| O | 0.941124  | 7.410706  | -4.141572 |
| C | -1.760189 | 8.319911  | -2.275281 |
| C | -2.959467 | 9.033819  | -2.332844 |
| H | -3.605249 | 8.708221  | -5.672613 |
| H | -1.509161 | 7.466725  | -5.566360 |
| H | 2.274952  | 5.960258  | -2.715799 |
| H | 1.477792  | 4.531956  | -3.351087 |
| H | 1.956111  | 5.342469  | -0.441341 |
| H | 2.671232  | 3.959870  | -1.254698 |
| H | 0.812196  | 3.533007  | 0.414332  |
| H | -1.240900 | 0.436651  | 2.381739  |
| H | -2.824732 | -1.269902 | 2.734985  |
| H | -1.198641 | -1.801033 | 3.273102  |
| H | -4.250670 | -3.004157 | 1.834853  |
| H | -5.689670 | -4.583073 | 2.688565  |

|   |           |           |           |
|---|-----------|-----------|-----------|
| H | -4.481907 | -5.131141 | 3.874552  |
| H | -4.926762 | -6.817395 | 2.041907  |
| H | -3.218440 | -6.308731 | 2.103866  |
| H | -5.341045 | -6.977699 | -0.445768 |
| H | -3.649913 | -7.411155 | -0.071489 |
| H | -4.289006 | -5.079173 | -1.970429 |
| H | -4.287894 | -6.755967 | -2.542854 |
| H | -2.408137 | -4.398976 | -0.690910 |
| H | -1.051944 | -4.626156 | -1.799867 |
| H | 0.096449  | -4.087229 | 0.274675  |
| H | 0.572223  | -6.481294 | 1.939567  |
| H | 2.956338  | -7.278224 | 2.520475  |
| H | 4.326345  | -6.711025 | 1.562727  |
| H | 3.582230  | -5.630738 | 2.735354  |
| H | 2.405008  | -4.320428 | -0.604047 |
| H | 3.215191  | -3.876915 | 0.907076  |
| H | 4.005976  | -4.961733 | -0.233773 |
| H | 1.660476  | -6.729157 | -0.997783 |
| H | 3.236045  | -7.352625 | -0.517143 |
| H | 1.779812  | -7.926092 | 0.305110  |
| H | 0.471843  | -3.104395 | 4.863358  |
| H | 1.699979  | -1.361527 | 4.436450  |
| H | 4.661091  | -1.426384 | 4.867592  |
| H | 3.620493  | -0.017431 | 5.066153  |
| H | 5.128986  | -2.341793 | 2.573604  |
| H | 5.368694  | -1.817688 | 0.187504  |
| H | 4.084758  | -2.590095 | -2.088652 |
| H | 2.563496  | -1.887788 | -1.492705 |
| H | 2.856009  | -2.018620 | -3.231469 |
| H | 5.108513  | 1.942396  | -4.114321 |
| H | 2.953332  | 1.721039  | 0.729203  |
| H | 2.716501  | 1.195617  | 3.109388  |
| H | 0.644365  | -3.976093 | 7.063854  |
| H | 2.115147  | -4.898665 | 6.701444  |
| H | 0.491526  | -6.656698 | 6.606325  |
| H | -1.278085 | -5.012707 | 5.112515  |
| H | 1.745711  | -6.739071 | 4.536643  |
| H | 0.062827  | -6.647602 | 3.913261  |
| H | -0.800436 | -1.966692 | -1.152606 |
| H | 1.017775  | 0.916929  | -4.200299 |
| H | -0.686694 | 5.310226  | 0.004349  |
| H | -1.584434 | 3.868657  | -0.457735 |
| H | -1.093809 | 4.325812  | -2.868653 |
| H | -1.884667 | 5.680082  | -2.093256 |
| H | -1.233171 | 8.225055  | -1.328583 |
| H | -3.355816 | 9.479792  | -1.421607 |

conformer\_19

|   |           |          |           |
|---|-----------|----------|-----------|
| F | -5.663449 | 1.632601 | -2.901690 |
| C | -5.880072 | 2.415111 | -1.821545 |

|   |           |           |           |
|---|-----------|-----------|-----------|
| F | -7.087496 | 3.009378  | -1.970522 |
| F | -5.924507 | 1.652054  | -0.706647 |
| O | -4.887874 | 3.425932  | -1.712509 |
| C | -3.592019 | 3.034107  | -1.530659 |
| C | -2.683957 | 4.091516  | -1.387212 |
| C | -1.323905 | 3.844269  | -1.191472 |
| C | -0.864578 | 2.527979  | -1.148983 |
| C | 0.562116  | 2.239722  | -0.897561 |
| N | 1.511226  | 2.660119  | -1.830491 |
| C | 1.191874  | 2.965948  | -3.227521 |
| C | 1.375185  | 1.711132  | -4.079932 |
| C | 2.784762  | 1.110968  | -3.887430 |
| C | 2.989314  | -0.178681 | -4.671829 |
| C | 2.245289  | -1.330661 | -4.405027 |
| N | 1.277053  | -1.402312 | -3.452517 |
| C | 0.631916  | -2.578947 | -3.278990 |
| C | 0.907325  | -3.715528 | -4.015874 |
| O | 0.322311  | -4.942952 | -3.886607 |
| C | -0.712879 | -5.048528 | -2.910998 |
| C | -1.266390 | -6.476568 | -2.838829 |
| N | -2.132799 | -6.669068 | -1.782087 |
| C | -2.634826 | -7.980844 | -1.397335 |
| C | -1.617556 | -8.760180 | -0.558310 |
| O | -1.373669 | -8.048190 | 0.665862  |
| C | -0.469491 | -8.769163 | 1.515750  |
| C | -0.102812 | -7.906281 | 2.725142  |
| O | 0.777065  | -6.849305 | 2.306709  |
| C | 1.235942  | -6.068177 | 3.406045  |
| C | 0.292285  | -4.944526 | 3.877275  |
| N | 0.806101  | -4.200419 | 4.921355  |
| C | 0.143687  | -2.982237 | 5.409162  |
| C | 0.508061  | -2.660376 | 6.895243  |
| C | 0.165818  | -3.878395 | 7.782800  |
| C | -0.324881 | -1.468947 | 7.405990  |
| C | 1.998495  | -2.325127 | 7.092465  |
| C | 0.485580  | -1.833479 | 4.411801  |
| N | -0.538238 | -1.058433 | 3.916064  |
| C | -0.281581 | 0.035831  | 2.972310  |
| C | 0.230100  | 1.300150  | 3.703719  |
| N | 0.676962  | 2.293499  | 2.864904  |
| C | 1.307132  | 3.490566  | 3.371628  |
| C | 1.372872  | 4.560971  | 2.316021  |
| C | 2.476919  | 4.650184  | 1.458743  |
| C | 2.523962  | 5.627078  | 0.459806  |
| C | 1.466783  | 6.531595  | 0.296862  |
| C | 1.505503  | 7.554757  | -0.747943 |
| C | 1.434156  | 8.938808  | -0.654435 |
| C | 1.325859  | 9.744217  | 0.593435  |
| N | 1.477904  | 9.613420  | -1.870162 |
| C | 1.580160  | 8.745288  | -2.853644 |

|   |           |           |           |
|---|-----------|-----------|-----------|
| S | 1.628427  | 7.095599  | -2.401071 |
| C | 0.363517  | 6.442416  | 1.155602  |
| C | 0.312583  | 5.460782  | 2.149840  |
| O | 0.215685  | 1.424601  | 4.928955  |
| C | -1.633846 | 0.291127  | 2.310780  |
| C | -2.632592 | -0.057759 | 3.412024  |
| O | -3.899195 | -0.399225 | 2.868765  |
| C | -1.970808 | -1.248557 | 4.110372  |
| O | 1.652317  | -1.637535 | 4.049288  |
| O | -0.813054 | -4.727896 | 3.383920  |
| O | -0.971026 | -7.369794 | -3.631769 |
| C | 1.899500  | -3.612460 | -4.990184 |
| C | 2.589123  | -2.426603 | -5.211606 |
| N | 3.536876  | -2.391368 | -6.165587 |
| C | 4.178578  | -1.229251 | -6.333966 |
| N | 3.954431  | -0.113269 | -5.630872 |
| C | 3.170818  | 0.961062  | -2.399598 |
| C | 2.897218  | 2.251454  | -1.629726 |
| O | 0.837037  | 1.631685  | 0.138100  |
| C | -1.760359 | 1.464446  | -1.281910 |
| C | -3.122590 | 1.718638  | -1.477392 |
| H | -3.036189 | 5.121286  | -1.422425 |
| H | -0.634318 | 4.674844  | -1.073220 |
| H | 1.869373  | 3.760483  | -3.560883 |
| H | 0.172848  | 3.339257  | -3.341768 |
| H | 1.212399  | 1.955489  | -5.136701 |
| H | 0.599020  | 0.989222  | -3.804252 |
| H | 3.485552  | 1.848600  | -4.307944 |
| H | -0.123507 | -2.552124 | -2.499516 |
| H | -1.547663 | -4.387328 | -3.173050 |
| H | -0.315893 | -4.801051 | -1.918699 |
| H | -2.193059 | -5.942579 | -1.072475 |
| H | -2.884540 | -8.544289 | -2.302188 |
| H | -3.549426 | -7.806303 | -0.821272 |
| H | -0.673952 | -8.874419 | -1.103716 |
| H | -2.021414 | -9.751620 | -0.324535 |
| H | 0.434772  | -9.023076 | 0.950896  |
| H | -0.965050 | -9.686211 | 1.851955  |
| H | 0.413685  | -8.529007 | 3.463905  |
| H | -1.003115 | -7.471104 | 3.171534  |
| H | 2.159051  | -5.580830 | 3.071408  |
| H | 1.492399  | -6.707970 | 4.258691  |
| H | 1.813416  | -4.250395 | 5.048815  |
| H | -0.930587 | -3.187824 | 5.360919  |
| H | 0.783217  | -4.747954 | 7.532638  |
| H | 0.333929  | -3.655677 | 8.842968  |
| H | -0.885059 | -4.167355 | 7.668175  |
| H | -0.116805 | -0.557294 | 6.838199  |
| H | -1.397920 | -1.676871 | 7.337203  |
| H | -0.102404 | -1.253044 | 8.457682  |



|   |           |           |           |
|---|-----------|-----------|-----------|
| H | 2.282878  | -1.412588 | 6.559239  |
| H | 2.223889  | -2.157509 | 8.152588  |
| H | 2.648405  | -3.136532 | 6.750321  |
| H | 0.476324  | -0.273097 | 2.243432  |
| H | 0.832206  | 2.061369  | 1.879687  |
| H | 2.313589  | 3.222403  | 3.714115  |
| H | 0.760187  | 3.850250  | 4.251166  |
| H | 3.309060  | 3.955021  | 1.559980  |
| H | 3.398245  | 5.674385  | -0.187269 |
| H | 2.018770  | 9.377523  | 1.357293  |
| H | 1.565967  | 10.794682 | 0.400532  |
| H | 0.307196  | 9.695561  | 0.990273  |
| H | 1.631079  | 9.045051  | -3.893403 |
| H | -0.478385 | 7.124297  | 1.047697  |
| H | -0.564283 | 5.401743  | 2.793148  |
| H | -1.772751 | -0.379586 | 1.453255  |
| H | -1.772420 | 1.314851  | 1.949682  |
| H | -2.751896 | 0.777894  | 4.111564  |
| H | -4.227081 | 0.395831  | 2.398438  |
| H | -2.217272 | -1.278516 | 5.174155  |
| H | -2.264374 | -2.202757 | 3.659488  |
| H | 2.145560  | -4.484704 | -5.592750 |
| H | 4.944639  | -1.189055 | -7.102413 |
| H | 4.231332  | 0.695632  | -2.310528 |
| H | 2.605784  | 0.148643  | -1.929264 |
| H | 3.107760  | 2.105913  | -0.565034 |
| H | 3.545278  | 3.061121  | -1.984903 |
| H | -1.404039 | 0.437189  | -1.236173 |
| H | -3.781969 | 0.860671  | -1.581685 |

conformer\_20

|   |           |           |           |
|---|-----------|-----------|-----------|
| F | -2.169838 | 7.785664  | -8.369993 |
| C | -2.515864 | 8.634197  | -7.376599 |
| F | -1.578027 | 9.599580  | -7.253162 |
| F | -3.683454 | 9.227280  | -7.721158 |
| O | -2.704952 | 7.941033  | -6.150629 |
| C | -1.640160 | 7.265690  | -5.625551 |
| C | -1.910681 | 6.610212  | -4.417065 |
| C | -0.917754 | 5.878298  | -3.761809 |
| C | 0.356759  | 5.788556  | -4.326597 |
| C | 1.432897  | 5.044993  | -3.632431 |
| N | 1.240870  | 3.687905  | -3.347232 |
| C | 2.332670  | 2.987551  | -2.673399 |
| C | 1.822344  | 1.816462  | -1.841331 |
| C | 0.957954  | 0.842623  | -2.653433 |
| C | 1.812396  | -0.077238 | -3.522212 |
| C | 2.299927  | -1.272522 | -2.988992 |
| N | 2.033530  | -1.696076 | -1.723941 |
| C | 2.553989  | -2.882929 | -1.324371 |
| C | 3.343272  | -3.679974 | -2.131250 |

|   |           |           |           |
|---|-----------|-----------|-----------|
| O | 3.920244  | -4.874979 | -1.817510 |
| C | 3.538207  | -5.518119 | -0.604737 |
| C | 2.160732  | -6.196795 | -0.640227 |
| N | 1.842888  | -6.746668 | -1.861526 |
| C | 0.544415  | -7.328452 | -2.167347 |
| C | -0.503462 | -6.268641 | -2.526569 |
| O | -0.070197 | -5.553763 | -3.692511 |
| C | -1.055225 | -4.646093 | -4.211350 |
| C | -1.271529 | -3.415402 | -3.322945 |
| O | -2.258284 | -3.708087 | -2.323635 |
| C | -2.386017 | -2.660647 | -1.362973 |
| C | -1.341605 | -2.711887 | -0.236284 |
| N | -1.447100 | -1.690142 | 0.686808  |
| C | -0.625783 | -1.724485 | 1.903104  |
| C | -0.376444 | -0.302836 | 2.501403  |
| C | 0.527919  | -0.400956 | 3.745991  |
| C | -1.678168 | 0.417490  | 2.896889  |
| C | 0.355666  | 0.566282  | 1.455942  |
| C | -1.336476 | -2.691450 | 2.900446  |
| N | -0.562050 | -3.548564 | 3.663224  |
| C | -1.184681 | -4.453325 | 4.653655  |
| C | -1.592200 | -3.747139 | 5.973383  |
| N | -2.530746 | -2.753871 | 5.826411  |
| C | -3.034061 | -1.956183 | 6.921924  |
| C | -2.339087 | -0.619810 | 6.995763  |
| C | -1.053741 | -0.514577 | 7.544422  |
| C | -0.407495 | 0.723712  | 7.615120  |
| C | -1.032915 | 1.883544  | 7.139501  |
| C | -0.368933 | 3.185421  | 7.222519  |
| C | -0.029373 | 4.093225  | 6.226816  |
| C | -0.239324 | 3.933329  | 4.761813  |
| N | 0.582090  | 5.258981  | 6.677009  |
| C | 0.695985  | 5.221687  | 7.987146  |
| S | 0.091207  | 3.817879  | 8.755563  |
| C | -2.312777 | 1.776518  | 6.580701  |
| C | -2.959332 | 0.537658  | 6.508663  |
| O | -1.180111 | -4.098349 | 7.079875  |
| C | -0.121646 | -5.532312 | 4.918943  |
| C | 0.663064  | -5.581161 | 3.621443  |
| O | -0.066768 | -6.360401 | 2.669618  |
| C | 0.714292  | -4.108610 | 3.208367  |
| O | -2.563677 | -2.643883 | 3.056960  |
| O | -0.480028 | -3.585391 | -0.154270 |
| O | 1.441834  | -6.284052 | 0.355089  |
| C | 3.606025  | -3.212586 | -3.418689 |
| C | 3.092623  | -2.008990 | -3.881417 |
| N | 3.375002  | -1.618974 | -5.136416 |
| C | 2.857446  | -0.450869 | -5.532031 |
| N | 2.087598  | 0.346593  | -4.782779 |
| C | -0.130568 | 1.610098  | -3.425408 |

|   |           |           |           |
|---|-----------|-----------|-----------|
| C | 0.380461  | 2.837272  | -4.178601 |
| O | 2.442140  | 5.673429  | -3.311768 |
| C | 0.643268  | 6.453828  | -5.521220 |
| C | -0.356921 | 7.185570  | -6.172815 |
| H | -2.904158 | 6.671212  | -3.974742 |
| H | -1.142663 | 5.386427  | -2.818087 |
| H | 2.867746  | 3.680633  | -2.014330 |
| H | 3.045183  | 2.657835  | -3.438270 |
| H | 1.209390  | 2.221117  | -1.025043 |
| H | 2.668033  | 1.299817  | -1.372285 |
| H | 0.415657  | 0.201262  | -1.945347 |
| H | 2.294804  | -3.151361 | -0.305243 |
| H | 3.601371  | -4.834266 | 0.248834  |
| H | 4.270845  | -6.312606 | -0.421167 |
| H | 2.422956  | -6.479848 | -2.654333 |
| H | 0.205703  | -7.910055 | -1.303648 |
| H | 0.701815  | -8.005511 | -3.013262 |
| H | -0.624475 | -5.576209 | -1.692570 |
| H | -1.460703 | -6.759886 | -2.732298 |
| H | -1.990225 | -5.187183 | -4.394624 |
| H | -0.662662 | -4.311242 | -5.177099 |
| H | -1.651319 | -2.589423 | -3.934208 |
| H | -0.330620 | -3.119214 | -2.850183 |
| H | -3.369597 | -2.777551 | -0.895224 |
| H | -2.354837 | -1.679908 | -1.851421 |
| H | -2.355712 | -1.239459 | 0.754699  |
| H | 0.347403  | -2.129552 | 1.616781  |
| H | 1.465621  | -0.917855 | 3.513729  |
| H | 0.786916  | 0.593010  | 4.127565  |
| H | 0.037109  | -0.940281 | 4.561672  |
| H | -2.340636 | 0.563420  | 2.037733  |
| H | -2.231830 | -0.137251 | 3.658892  |
| H | -1.466511 | 1.410090  | 3.309568  |
| H | -0.262720 | 0.730730  | 0.567041  |
| H | 0.606276  | 1.551967  | 1.864997  |
| H | 1.290452  | 0.094425  | 1.132766  |
| H | -2.080464 | -4.903273 | 4.207035  |
| H | -2.835090 | -2.512694 | 4.883328  |
| H | -2.916894 | -2.489712 | 7.871847  |
| H | -4.109001 | -1.822675 | 6.757161  |
| H | -0.545898 | -1.400242 | 7.924154  |
| H | 0.591941  | 0.769616  | 8.044944  |
| H | -1.306719 | 3.938736  | 4.522062  |
| H | 0.234651  | 4.750075  | 4.208021  |
| H | 0.197344  | 2.994086  | 4.410710  |
| H | 1.144198  | 6.026509  | 8.556954  |
| H | -2.828498 | 2.659224  | 6.206250  |
| H | -3.955307 | 0.486769  | 6.070709  |
| H | -0.588168 | -6.488170 | 5.178765  |
| H | 0.551367  | -5.241852 | 5.734534  |

|   |           |           |           |
|---|-----------|-----------|-----------|
| H | 1.655759  | -6.024548 | 3.739367  |
| H | 0.449566  | -6.330935 | 1.827946  |
| H | 1.507684  | -3.575529 | 3.741969  |
| H | 0.847277  | -4.009570 | 2.130996  |
| H | 4.228517  | -3.808216 | -4.083974 |
| H | 3.080314  | -0.122458 | -6.542559 |
| H | -0.874322 | 1.957278  | -2.694777 |
| H | -0.661634 | 0.944332  | -4.116368 |
| H | 0.963991  | 2.557930  | -5.061904 |
| H | -0.479380 | 3.393944  | -4.557503 |
| H | 1.641445  | 6.404292  | -5.952140 |
| H | -0.089184 | 7.680195  | -7.103144 |

conformer\_21

|   |           |           |           |
|---|-----------|-----------|-----------|
| F | 2.306462  | 5.142170  | -3.206844 |
| C | 1.632179  | 5.725468  | -2.189709 |
| F | 2.218137  | 5.401507  | -1.015766 |
| F | 1.720741  | 7.066242  | -2.352649 |
| O | 0.263321  | 5.349993  | -2.204525 |
| C | -0.040023 | 4.025633  | -2.063036 |
| C | -1.412706 | 3.744957  | -2.068688 |
| C | -1.875224 | 2.433236  | -1.943228 |
| C | -0.954873 | 1.390191  | -1.821618 |
| C | -1.423207 | 0.000051  | -1.637363 |
| N | -2.207396 | -0.580811 | -2.634673 |
| C | -2.656945 | -1.956199 | -2.443106 |
| C | -1.678527 | -2.921377 | -3.107879 |
| C | -1.485724 | -2.557958 | -4.593420 |
| C | -0.521600 | -3.495609 | -5.304816 |
| C | 0.832674  | -3.572107 | -4.966256 |
| N | 1.421335  | -2.831425 | -3.986000 |
| C | 2.751402  | -2.987372 | -3.770976 |
| C | 3.538831  | -3.869999 | -4.484359 |
| O | 4.876906  | -4.094938 | -4.350712 |
| C | 5.573556  | -3.451483 | -3.288371 |
| C | 5.340247  | -4.039961 | -1.890123 |
| N | 5.160799  | -5.403835 | -1.871793 |
| C | 4.862621  | -6.147077 | -0.656586 |
| C | 3.410107  | -5.975065 | -0.198026 |
| O | 2.531282  | -6.510699 | -1.196802 |
| C | 1.154865  | -6.542394 | -0.786611 |
| C | 0.509740  | -5.153372 | -0.760412 |
| O | 0.808455  | -4.499365 | 0.480067  |
| C | 0.321721  | -3.157418 | 0.492784  |
| C | 0.553742  | -2.476445 | 1.849608  |
| N | 0.249163  | -1.130901 | 1.855890  |
| C | 0.258404  | -0.346739 | 3.098270  |
| C | 0.599070  | 1.160022  | 2.841639  |
| C | 0.778853  | 1.918972  | 4.170912  |
| C | -0.492234 | 1.881214  | 2.034404  |

|   |           |           |           |
|---|-----------|-----------|-----------|
| C | 1.929337  | 1.265484  | 2.063948  |
| C | -1.131929 | -0.556858 | 3.767468  |
| N | -1.195913 | -0.699705 | 5.137677  |
| C | -2.479486 | -0.911526 | 5.825857  |
| C | -3.163876 | 0.442804  | 6.146926  |
| N | -3.457518 | 1.197324  | 5.034268  |
| C | -4.202078 | 2.435409  | 5.083373  |
| C | -3.628380 | 3.444945  | 4.123809  |
| C | -2.688319 | 4.385290  | 4.562822  |
| C | -2.136196 | 5.311430  | 3.671091  |
| C | -2.496536 | 5.310439  | 2.316388  |
| C | -1.904602 | 6.283384  | 1.388578  |
| C | -0.583430 | 6.682544  | 1.205523  |
| C | 0.622350  | 6.174766  | 1.917391  |
| N | -0.390994 | 7.665473  | 0.239281  |
| C | -1.546253 | 7.997781  | -0.292160 |
| S | -2.915926 | 7.176487  | 0.314526  |
| C | -3.428879 | 4.357576  | 1.878526  |
| C | -3.990704 | 3.436958  | 2.771225  |
| O | -3.475326 | 0.789745  | 7.285692  |
| C | -2.105053 | -1.694340 | 7.084044  |
| C | -0.705310 | -1.182862 | 7.411504  |
| O | 0.011275  | -2.115902 | 8.207064  |
| C | -0.080854 | -1.017042 | 6.024770  |
| O | -2.172615 | -0.553625 | 3.097059  |
| O | 0.976320  | -3.066453 | 2.843967  |
| O | 5.357603  | -3.350109 | -0.871230 |
| C | 2.905551  | -4.628119 | -5.468516 |
| C | 1.550607  | -4.498354 | -5.738243 |
| N | 1.011723  | -5.254299 | -6.710847 |
| C | -0.295112 | -5.093865 | -6.942632 |
| N | -1.095424 | -4.248353 | -6.285232 |
| C | -1.139317 | -1.066963 | -4.786807 |
| C | -2.136604 | -0.175348 | -4.043021 |
| O | -1.106352 | -0.575997 | -0.596171 |
| C | 0.415666  | 1.657967  | -1.795833 |
| C | 0.871648  | 2.975355  | -1.921157 |
| H | -2.133266 | 4.555050  | -2.168574 |
| H | -2.944480 | 2.235050  | -1.935258 |
| H | -3.655687 | -2.050151 | -2.885313 |
| H | -2.748168 | -2.185813 | -1.376153 |
| H | -2.049545 | -3.948929 | -3.012633 |
| H | -0.724435 | -2.877939 | -2.572241 |
| H | -2.467369 | -2.702683 | -5.070636 |
| H | 3.144878  | -2.349260 | -2.985816 |
| H | 5.371839  | -2.374096 | -3.280747 |
| H | 6.643986  | -3.564763 | -3.496272 |
| H | 4.990820  | -5.868842 | -2.761361 |
| H | 5.542612  | -5.808337 | 0.132160  |
| H | 5.069810  | -7.199179 | -0.877503 |

|   |           |           |           |
|---|-----------|-----------|-----------|
| H | 3.194917  | -4.913402 | -0.048310 |
| H | 3.263036  | -6.512805 | 0.744928  |
| H | 1.070896  | -7.049920 | 0.180877  |
| H | 0.638223  | -7.151730 | -1.535274 |
| H | -0.578112 | -5.255313 | -0.837921 |
| H | 0.885920  | -4.549421 | -1.592260 |
| H | -0.756830 | -3.159807 | 0.299773  |
| H | 0.841926  | -2.579006 | -0.278854 |
| H | -0.347870 | -0.800694 | 1.090409  |
| H | 1.037130  | -0.775255 | 3.736779  |
| H | 1.585825  | 1.483019  | 4.769141  |
| H | 1.038670  | 2.969449  | 3.992904  |
| H | -0.137243 | 1.912578  | 4.770094  |
| H | -0.690693 | 1.383108  | 1.085831  |
| H | -1.431886 | 1.927750  | 2.588969  |
| H | -0.199660 | 2.910207  | 1.803067  |
| H | 1.852993  | 0.821701  | 1.065581  |
| H | 2.228601  | 2.311695  | 1.930415  |
| H | 2.738771  | 0.755046  | 2.598107  |
| H | -3.166576 | -1.493698 | 5.200420  |
| H | -3.301251 | 0.775269  | 4.119432  |
| H | -4.214631 | 2.837776  | 6.102537  |
| H | -5.240963 | 2.207506  | 4.818511  |
| H | -2.380082 | 4.407765  | 5.607298  |
| H | -1.427500 | 6.041544  | 4.056824  |
| H | 0.602728  | 5.085214  | 2.000164  |
| H | 1.534770  | 6.450030  | 1.378676  |
| H | 0.682734  | 6.604937  | 2.921413  |
| H | -1.636363 | 8.746952  | -1.069403 |
| H | -3.723979 | 4.309516  | 0.831451  |
| H | -4.706862 | 2.706455  | 2.397467  |
| H | -2.065693 | -2.769476 | 6.864288  |
| H | -2.798267 | -1.567739 | 7.921059  |
| H | -0.747711 | -0.218697 | 7.931435  |
| H | -0.482025 | -2.199645 | 9.050758  |
| H | 0.666566  | -0.221608 | 6.011991  |
| H | 0.395139  | -1.941736 | 5.679223  |
| H | 3.491230  | -5.336990 | -6.051263 |
| H | -0.741653 | -5.697905 | -7.726402 |
| H | -1.143415 | -0.813621 | -5.853846 |
| H | -0.131652 | -0.848898 | -4.415253 |
| H | -1.837992 | 0.868892  | -4.153000 |
| H | -3.140486 | -0.277406 | -4.471356 |
| H | 1.132077  | 0.847620  | -1.677851 |
| H | 1.946398  | 3.136807  | -1.901314 |

conformer\_22

|   |           |          |           |
|---|-----------|----------|-----------|
| F | -7.092444 | 8.583849 | -0.315015 |
| C | -6.454684 | 9.111507 | -1.383403 |
| F | -6.241373 | 8.149786 | -2.308713 |

|   |           |           |           |
|---|-----------|-----------|-----------|
| F | -7.263752 | 10.048207 | -1.932637 |
| O | -5.236819 | 9.734625  | -0.999117 |
| C | -4.273487 | 8.957146  | -0.422080 |
| C | -4.359595 | 7.587521  | -0.159419 |
| C | -3.287571 | 6.916667  | 0.441382  |
| C | -2.120257 | 7.614187  | 0.769116  |
| C | -0.994608 | 6.920828  | 1.436349  |
| N | -0.416562 | 5.812217  | 0.808606  |
| C | -0.418392 | 5.650912  | -0.652439 |
| C | -0.352781 | 4.182608  | -1.061306 |
| C | 0.836150  | 3.483763  | -0.386308 |
| C | 1.004559  | 2.033452  | -0.813080 |
| C | 0.038091  | 1.058412  | -0.554774 |
| N | -1.131953 | 1.294821  | 0.097828  |
| C | -1.985556 | 0.259075  | 0.285547  |
| C | -1.734486 | -1.024849 | -0.159341 |
| O | -2.533115 | -2.122291 | -0.022949 |
| C | -3.727793 | -1.954284 | 0.737229  |
| C | -4.509020 | -3.272943 | 0.794138  |
| N | -5.429045 | -3.322561 | 1.819364  |
| C | -6.204506 | -4.513802 | 2.135689  |
| C | -5.379325 | -5.575974 | 2.869989  |
| O | -4.879579 | -5.030818 | 4.099431  |
| C | -4.261842 | -6.041500 | 4.912088  |
| C | -3.286295 | -5.373967 | 5.881550  |
| O | -2.089973 | -5.025046 | 5.164836  |
| C | -1.194122 | -4.263027 | 5.978810  |
| C | 0.228943  | -4.272875 | 5.403705  |
| N | 0.483254  | -5.347237 | 4.580569  |
| C | 1.745317  | -5.521800 | 3.857073  |
| C | 2.114115  | -7.028650 | 3.666495  |
| C | 1.080736  | -7.803741 | 2.827363  |
| C | 2.214518  | -7.707655 | 5.051150  |
| C | 3.489697  | -7.159631 | 2.984609  |
| C | 1.629629  | -4.730511 | 2.520180  |
| N | 2.614633  | -3.818244 | 2.209222  |
| C | 2.558952  | -3.021394 | 0.978879  |
| C | 3.060337  | -3.826208 | -0.245865 |
| N | 2.969021  | -3.149755 | -1.440748 |
| C | 3.298868  | -3.778683 | -2.700113 |
| C | 3.502883  | -2.745769 | -3.775780 |
| C | 4.748198  | -2.124029 | -3.934931 |
| C | 4.929566  | -1.136131 | -4.907675 |
| C | 3.869026  | -0.748036 | -5.736262 |
| C | 4.062854  | 0.298637  | -6.739384 |
| C | 4.449530  | 1.624609  | -6.591156 |
| C | 4.742823  | 2.330240  | -5.312964 |
| N | 4.556224  | 2.341874  | -7.778055 |
| C | 4.251701  | 1.562928  | -8.793995 |
| S | 3.826654  | -0.048991 | -8.406725 |

|   |           |           |           |
|---|-----------|-----------|-----------|
| C | 2.621534  | -1.363492 | -5.570015 |
| C | 2.439219  | -2.351192 | -4.597333 |
| O | 3.524468  | -4.963756 | -0.163253 |
| C | 3.465643  | -1.826501 | 1.269155  |
| C | 4.533035  | -2.416230 | 2.189297  |
| O | 5.143868  | -1.407242 | 2.979983  |
| C | 3.739229  | -3.408338 | 3.042938  |
| O | 0.658048  | -4.883393 | 1.770284  |
| O | 1.074871  | -3.429413 | 5.695353  |
| O | -4.348684 | -4.198624 | -0.000930 |
| C | -0.534904 | -1.236626 | -0.834729 |
| C | 0.383968  | -0.216269 | -1.031462 |
| N | 1.541235  | -0.507943 | -1.649797 |
| C | 2.380403  | 0.514826  | -1.855565 |
| N | 2.173175  | 1.776147  | -1.465032 |
| C | 0.776532  | 3.663775  | 1.136872  |
| C | 0.681462  | 5.141396  | 1.506249  |
| O | -0.639189 | 7.341596  | 2.537576  |
| C | -2.033013 | 8.985756  | 0.528010  |
| C | -3.106076 | 9.648816  | -0.072466 |
| H | -5.243702 | 7.002964  | -0.401068 |
| H | -3.370742 | 5.852283  | 0.653291  |
| H | 0.455445  | 6.193694  | -1.034185 |
| H | -1.293852 | 6.114350  | -1.110803 |
| H | -0.267859 | 4.109135  | -2.152373 |
| H | -1.297811 | 3.701643  | -0.784520 |
| H | 1.740644  | 4.011435  | -0.726385 |
| H | -2.893784 | 0.528537  | 0.816630  |
| H | -4.383083 | -1.213948 | 0.263295  |
| H | -3.476215 | -1.652597 | 1.761068  |
| H | -5.387796 | -2.606839 | 2.540861  |
| H | -6.604479 | -4.929539 | 1.204990  |
| H | -7.037964 | -4.182009 | 2.763663  |
| H | -4.531729 | -5.899917 | 2.255911  |
| H | -6.016079 | -6.441421 | 3.086524  |
| H | -3.726210 | -6.760627 | 4.281395  |
| H | -5.054492 | -6.555457 | 5.465128  |
| H | -3.018700 | -6.076319 | 6.678199  |
| H | -3.728892 | -4.468946 | 6.312442  |
| H | -1.138678 | -4.681655 | 6.989952  |
| H | -1.548907 | -3.228308 | 6.017017  |
| H | -0.354032 | -5.782470 | 4.195564  |
| H | 2.519149  | -5.063828 | 4.480315  |
| H | 1.025298  | -7.426650 | 1.801521  |
| H | 1.348769  | -8.865069 | 2.761645  |
| H | 0.078520  | -7.751984 | 3.264339  |
| H | 2.934127  | -7.188547 | 5.694393  |
| H | 1.248433  | -7.718175 | 5.567511  |
| H | 2.544959  | -8.748751 | 4.958866  |
| H | 4.269469  | -6.654780 | 3.564651  |



|   |           |           |           |
|---|-----------|-----------|-----------|
| H | 3.784238  | -8.211208 | 2.887406  |
| H | 3.483613  | -6.731450 | 1.977837  |
| H | 1.527438  | -2.711125 | 0.784317  |
| H | 2.396713  | -2.306190 | -1.486611 |
| H | 2.479787  | -4.458648 | -2.962243 |
| H | 4.198338  | -4.394487 | -2.582706 |
| H | 5.586692  | -2.403174 | -3.298322 |
| H | 5.911136  | -0.676632 | -5.013407 |
| H | 5.711448  | 2.011986  | -4.915674 |
| H | 4.777328  | 3.413690  | -5.465454 |
| H | 3.970537  | 2.121892  | -4.565867 |
| H | 4.265599  | 1.909973  | -9.820114 |
| H | 1.773320  | -1.072021 | -6.187541 |
| H | 1.455381  | -2.803238 | -4.479434 |
| H | 2.907104  | -1.041985 | 1.796027  |
| H | 3.909198  | -1.365702 | 0.381389  |
| H | 5.303489  | -2.940050 | 1.611396  |
| H | 5.598604  | -0.800451 | 2.358174  |
| H | 4.344992  | -4.274379 | 3.321994  |
| H | 3.352481  | -2.944253 | 3.956713  |
| H | -0.305975 | -2.233471 | -1.206359 |
| H | 3.309448  | 0.301373  | -2.374815 |
| H | 1.663641  | 3.224080  | 1.608597  |
| H | -0.092998 | 3.144296  | 1.555800  |
| H | 0.550030  | 5.232114  | 2.590286  |
| H | 1.608127  | 5.667173  | 1.245560  |
| H | -1.137762 | 9.540479  | 0.799978  |
| H | -3.028239 | 10.718055 | -0.264562 |

conformer\_23

|   |           |           |           |
|---|-----------|-----------|-----------|
| F | 0.511119  | 7.906765  | 3.902497  |
| C | 0.123047  | 7.937350  | 2.608496  |
| F | -1.132845 | 8.441288  | 2.560875  |
| F | 0.931380  | 8.763674  | 1.908619  |
| O | 0.108116  | 6.631866  | 2.045962  |
| C | 1.290473  | 5.951722  | 1.974178  |
| C | 2.530153  | 6.392860  | 2.444253  |
| C | 3.665676  | 5.586071  | 2.304293  |
| C | 3.565292  | 4.341418  | 1.678838  |
| C | 4.767277  | 3.484706  | 1.571377  |
| N | 5.179176  | 3.061498  | 0.311236  |
| C | 4.799022  | 3.702201  | -0.952205 |
| C | 4.374895  | 2.657665  | -1.979069 |
| C | 5.455396  | 1.572171  | -2.145489 |
| C | 5.067247  | 0.484604  | -3.139927 |
| C | 3.960417  | -0.341466 | -2.934145 |
| N | 3.127720  | -0.227845 | -1.868060 |
| C | 2.091765  | -1.090080 | -1.767157 |
| C | 1.846734  | -2.099146 | -2.677997 |
| O | 0.852484  | -3.033620 | -2.619650 |

|   |           |           |           |
|---|-----------|-----------|-----------|
| C | -0.033777 | -2.939761 | -1.505301 |
| C | -1.081485 | -4.055591 | -1.533139 |
| N | -1.878318 | -4.088664 | -0.406403 |
| C | -2.821834 | -5.170116 | -0.150472 |
| C | -2.157872 | -6.343171 | 0.578280  |
| O | -1.863801 | -5.931201 | 1.920356  |
| C | -1.065452 | -6.897887 | 2.619568  |
| C | -0.894310 | -6.429318 | 4.065956  |
| O | -0.172071 | -5.189923 | 4.068146  |
| C | -0.190032 | -4.559563 | 5.353173  |
| C | 0.209421  | -3.086233 | 5.207445  |
| N | 0.973301  | -2.833767 | 4.087180  |
| C | 1.170020  | -1.482162 | 3.559575  |
| C | 2.567988  | -1.295468 | 2.893465  |
| C | 2.681061  | 0.112777  | 2.278446  |
| C | 2.861007  | -2.338497 | 1.800593  |
| C | 3.662421  | -1.423731 | 3.976627  |
| C | -0.033816 | -1.222166 | 2.601866  |
| N | -0.783646 | -0.074153 | 2.760463  |
| C | -1.944253 | 0.182084  | 1.895686  |
| C | -1.566975 | 0.434718  | 0.419233  |
| N | -2.648130 | 0.455568  | -0.432941 |
| C | -2.515951 | 0.786800  | -1.833661 |
| C | -3.708069 | 0.293971  | -2.608981 |
| C | -3.765607 | -1.033013 | -3.054392 |
| C | -4.885829 | -1.503131 | -3.746007 |
| C | -5.973307 | -0.658000 | -4.001123 |
| C | -7.148399 | -1.163087 | -4.711713 |
| C | -7.991941 | -2.226195 | -4.413770 |
| C | -7.910816 | -3.126366 | -3.229701 |
| N | -9.013098 | -2.442405 | -5.333634 |
| C | -8.931865 | -1.554162 | -6.300766 |
| S | -7.654676 | -0.422048 | -6.179335 |
| C | -5.919104 | 0.666450  | -3.546175 |
| C | -4.798778 | 1.137103  | -2.853872 |
| O | -0.413770 | 0.620890  | 0.034383  |
| C | -2.601111 | 1.445176  | 2.471070  |
| C | -2.128554 | 1.485489  | 3.916585  |
| O | -2.992544 | 0.684085  | 4.730259  |
| C | -0.718523 | 0.895562  | 3.853235  |
| O | -0.337896 | -2.049393 | 1.730136  |
| O | -0.114436 | -2.219126 | 6.016534  |
| O | -1.206291 | -4.850926 | -2.463624 |
| C | 2.710637  | -2.188232 | -3.768774 |
| C | 3.781295  | -1.315086 | -3.928807 |
| N | 4.582165  | -1.448426 | -5.001304 |
| C | 5.606186  | -0.591226 | -5.097713 |
| N | 5.895133  | 0.372787  | -4.215449 |
| C | 5.895577  | 0.988551  | -0.789359 |
| C | 6.265148  | 2.091132  | 0.198518  |

|   |           |           |           |
|---|-----------|-----------|-----------|
| O | 5.327292  | 3.160033  | 2.618442  |
| C | 2.326960  | 3.882998  | 1.221346  |
| C | 1.197454  | 4.691669  | 1.367600  |
| H | 2.658903  | 7.356729  | 2.930412  |
| H | 4.624575  | 5.936187  | 2.681866  |
| H | 5.677645  | 4.253129  | -1.310687 |
| H | 4.006514  | 4.441032  | -0.817372 |
| H | 4.180189  | 3.145071  | -2.942111 |
| H | 3.425180  | 2.223289  | -1.650942 |
| H | 6.338052  | 2.079568  | -2.563782 |
| H | 1.469479  | -0.921893 | -0.894664 |
| H | -0.569499 | -1.984259 | -1.526144 |
| H | 0.533736  | -3.055631 | -0.576145 |
| H | -1.594677 | -3.530234 | 0.399339  |
| H | -3.238779 | -5.510062 | -1.104279 |
| H | -3.625867 | -4.744059 | 0.458353  |
| H | -1.236262 | -6.646006 | 0.068236  |
| H | -2.846873 | -7.193394 | 0.618741  |
| H | -0.090007 | -6.967152 | 2.126028  |
| H | -1.564272 | -7.872431 | 2.598739  |
| H | -0.334594 | -7.169946 | 4.645862  |
| H | -1.882182 | -6.276792 | 4.515182  |
| H | 0.518541  | -5.060711 | 6.019191  |
| H | -1.199886 | -4.584959 | 5.776537  |
| H | 0.923221  | -3.587426 | 3.399850  |
| H | 1.117358  | -0.797654 | 4.407886  |
| H | 2.475685  | 0.888141  | 3.024645  |
| H | 3.688142  | 0.292812  | 1.885334  |
| H | 1.981510  | 0.248016  | 1.448174  |
| H | 2.873362  | -3.356904 | 2.202059  |
| H | 2.118542  | -2.302471 | 1.001805  |
| H | 3.840606  | -2.160660 | 1.341487  |
| H | 3.664749  | -2.420331 | 4.431196  |
| H | 4.659354  | -1.254846 | 3.553523  |
| H | 3.515415  | -0.690297 | 4.777518  |
| H | -2.612623 | -0.685593 | 1.956668  |
| H | -3.585458 | 0.466370  | -0.042020 |
| H | -1.591351 | 0.354518  | -2.233735 |
| H | -2.419079 | 1.875868  | -1.914554 |
| H | -2.937690 | -1.713541 | -2.864605 |
| H | -4.896149 | -2.536982 | -4.087846 |
| H | -7.725859 | -2.555143 | -2.314567 |
| H | -8.846598 | -3.678485 | -3.095562 |
| H | -7.103637 | -3.853676 | -3.359656 |
| H | -9.626650 | -1.530783 | -7.131636 |
| H | -6.753922 | 1.344751  | -3.714817 |
| H | -4.788680 | 2.168525  | -2.503297 |
| H | -3.691462 | 1.401274  | 2.378429  |
| H | -2.248074 | 2.340786  | 1.944450  |
| H | -2.135910 | 2.496739  | 4.332235  |

|   |           |           |           |
|---|-----------|-----------|-----------|
| H | -2.810760 | -0.255574 | 4.522755  |
| H | 0.019509  | 1.652271  | 3.570329  |
| H | -0.439942 | 0.422838  | 4.795989  |
| H | 2.548894  | -2.965541 | -4.513178 |
| H | 6.257507  | -0.688128 | -5.961087 |
| H | 6.751111  | 0.316141  | -0.927051 |
| H | 5.093014  | 0.385816  | -0.348640 |
| H | 6.493197  | 1.645064  | 1.172456  |
| H | 7.160766  | 2.628190  | -0.134775 |
| H | 2.233086  | 2.905033  | 0.754847  |
| H | 0.236183  | 4.332317  | 1.002925  |

conformer\_24

|   |           |           |           |
|---|-----------|-----------|-----------|
| F | -1.141690 | 10.387720 | -0.922399 |
| C | -2.033321 | 9.653086  | -1.623490 |
| F | -2.319948 | 8.517036  | -0.949275 |
| F | -3.174335 | 10.373580 | -1.733625 |
| O | -1.549929 | 9.368191  | -2.928902 |
| C | -0.421033 | 8.607452  | -3.040884 |
| C | -0.052965 | 8.310474  | -4.359958 |
| C | 1.077352  | 7.535883  | -4.631450 |
| C | 1.842370  | 7.043423  | -3.573848 |
| C | 3.045516  | 6.229452  | -3.863800 |
| N | 3.132491  | 4.943370  | -3.320602 |
| C | 4.323284  | 4.155878  | -3.636141 |
| C | 4.626268  | 3.097342  | -2.574374 |
| C | 3.403998  | 2.256983  | -2.155813 |
| C | 3.016762  | 1.158149  | -3.144451 |
| C | 2.219889  | 0.096806  | -2.709469 |
| N | 1.793284  | -0.045375 | -1.424852 |
| C | 0.984566  | -1.091847 | -1.134505 |
| C | 0.576087  | -2.021299 | -2.072422 |
| O | -0.269406 | -3.073543 | -1.880970 |
| C | -0.803292 | -3.239679 | -0.568865 |
| C | -1.833276 | -4.373685 | -0.572253 |
| N | -2.151525 | -4.836360 | 0.686207  |
| C | -3.019446 | -5.984241 | 0.898582  |
| C | -2.291237 | -7.313138 | 0.679584  |
| O | -1.253988 | -7.449529 | 1.661689  |
| C | -0.575014 | -8.707055 | 1.530226  |
| C | 0.558514  | -8.767034 | 2.552244  |
| O | 1.636824  | -7.916372 | 2.125397  |
| C | 2.648649  | -7.819817 | 3.128670  |
| C | 2.416955  | -6.658638 | 4.104039  |
| N | 1.915817  | -5.523147 | 3.507958  |
| C | 1.515186  | -4.327200 | 4.258056  |
| C | 2.458358  | -3.116633 | 3.946199  |
| C | 3.917303  | -3.490248 | 4.292418  |
| C | 2.083626  | -1.893193 | 4.802894  |
| C | 2.408990  | -2.700267 | 2.462363  |

|   |           |           |           |
|---|-----------|-----------|-----------|
| C | 0.030230  | -4.062437 | 3.882477  |
| N | -0.841067 | -3.655451 | 4.865862  |
| C | -2.236946 | -3.335789 | 4.555196  |
| C | -2.389302 | -1.850397 | 4.155346  |
| N | -3.541171 | -1.570809 | 3.457191  |
| C | -3.919470 | -0.228815 | 3.075643  |
| C | -3.410885 | 0.146657  | 1.707152  |
| C | -2.165559 | 0.770453  | 1.557029  |
| C | -1.724434 | 1.186416  | 0.297022  |
| C | -2.514468 | 0.980998  | -0.841527 |
| C | -2.073953 | 1.489509  | -2.142736 |
| C | -1.700734 | 2.773821  | -2.523009 |
| C | -1.714573 | 3.998463  | -1.674405 |
| N | -1.279898 | 2.898780  | -3.842510 |
| C | -1.373754 | 1.734891  | -4.447579 |
| S | -1.953866 | 0.437034  | -3.496479 |
| C | -3.740007 | 0.317063  | -0.696223 |
| C | -4.181863 | -0.100768 | 0.564472  |
| O | -1.588575 | -0.980782 | 4.500366  |
| C | -2.990359 | -3.616869 | 5.853137  |
| C | -1.958443 | -3.294279 | 6.933757  |
| O | -2.247708 | -3.985541 | 8.140795  |
| C | -0.643953 | -3.768344 | 6.306918  |
| O | -0.353225 | -4.167867 | 2.709713  |
| O | 2.693190  | -6.731808 | 5.300302  |
| O | -2.348181 | -4.824912 | -1.595398 |
| C | 1.056592  | -1.867106 | -3.372182 |
| C | 1.881718  | -0.809213 | -3.725336 |
| N | 2.292131  | -0.700015 | -5.000950 |
| C | 3.061774  | 0.353641  | -5.294436 |
| N | 3.441554  | 1.298965  | -4.427450 |
| C | 2.220126  | 3.188224  | -1.849380 |
| C | 1.940456  | 4.153774  | -2.993659 |
| O | 3.928852  | 6.740704  | -4.552041 |
| C | 1.499529  | 7.354227  | -2.253564 |
| C | 0.365023  | 8.130108  | -1.988881 |
| H | -0.651578 | 8.684134  | -5.189693 |
| H | 1.348627  | 7.315801  | -5.661503 |
| H | 5.190158  | 4.820996  | -3.726448 |
| H | 4.169331  | 3.710481  | -4.624439 |
| H | 4.991326  | 3.620731  | -1.679693 |
| H | 5.448119  | 2.454947  | -2.912578 |
| H | 3.691579  | 1.748926  | -1.224648 |
| H | 0.673033  | -1.131444 | -0.095182 |
| H | -1.326979 | -2.333547 | -0.242356 |
| H | 0.005939  | -3.496833 | 0.122867  |
| H | -1.509573 | -4.605176 | 1.450848  |
| H | -3.874145 | -5.909699 | 0.218370  |
| H | -3.378545 | -5.913081 | 1.930443  |
| H | -1.849134 | -7.353801 | -0.322105 |

|   |           |           |           |
|---|-----------|-----------|-----------|
| H | -3.003341 | -8.138376 | 0.791794  |
| H | -0.176092 | -8.798189 | 0.513854  |
| H | -1.290050 | -9.513754 | 1.724261  |
| H | 0.935291  | -9.793184 | 2.622017  |
| H | 0.199125  | -8.435743 | 3.533284  |
| H | 3.599285  | -7.625313 | 2.620805  |
| H | 2.748347  | -8.758195 | 3.685896  |
| H | 1.570157  | -5.621906 | 2.553850  |
| H | 1.582366  | -4.563367 | 5.323887  |
| H | 4.294838  | -4.292560 | 3.649397  |
| H | 4.587362  | -2.632271 | 4.162760  |
| H | 4.002992  | -3.821948 | 5.333249  |
| H | 1.073185  | -1.538314 | 4.582459  |
| H | 2.141855  | -2.124889 | 5.871479  |
| H | 2.765706  | -1.055601 | 4.614513  |
| H | 1.421164  | -2.321215 | 2.181691  |
| H | 3.128296  | -1.898738 | 2.256033  |
| H | 2.654552  | -3.535287 | 1.797940  |
| H | -2.601554 | -3.964931 | 3.735909  |
| H | -4.119180 | -2.331595 | 3.113221  |
| H | -3.555436 | 0.486563  | 3.822686  |
| H | -5.014197 | -0.178476 | 3.097587  |
| H | -1.538078 | 0.959163  | 2.427426  |
| H | -0.757614 | 1.681411  | 0.218495  |
| H | -1.626425 | 4.899134  | -2.290728 |
| H | -2.648660 | 4.070728  | -1.108593 |
| H | -0.877150 | 3.986811  | -0.970586 |
| H | -1.106074 | 1.595404  | -5.487883 |
| H | -4.381725 | 0.142356  | -1.558618 |
| H | -5.149199 | -0.594275 | 0.649217  |
| H | -3.273666 | -4.675659 | 5.909460  |
| H | -3.905227 | -3.028113 | 5.974930  |
| H | -1.921121 | -2.217278 | 7.134286  |
| H | -3.117848 | -3.655466 | 8.450546  |
| H | 0.200325  | -3.154676 | 6.629349  |
| H | -0.425131 | -4.813554 | 6.553748  |
| H | 0.760690  | -2.582375 | -4.137308 |
| H | 3.402386  | 0.452710  | -6.320512 |
| H | 2.458547  | 3.771375  | -0.949852 |
| H | 1.312334  | 2.620639  | -1.620141 |
| H | 1.642824  | 3.619673  | -3.903657 |
| H | 1.098276  | 4.791638  | -2.722592 |
| H | 2.109641  | 6.994599  | -1.427234 |
| H | 0.134560  | 8.341059  | -0.947689 |

## 8. NMR Spectra of PROTAC 1

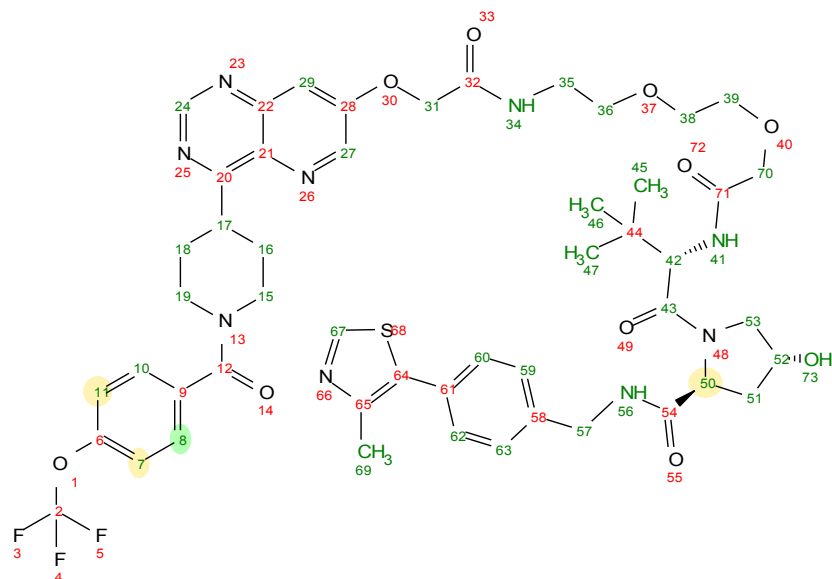

Structure and numbering of PROTAC 1

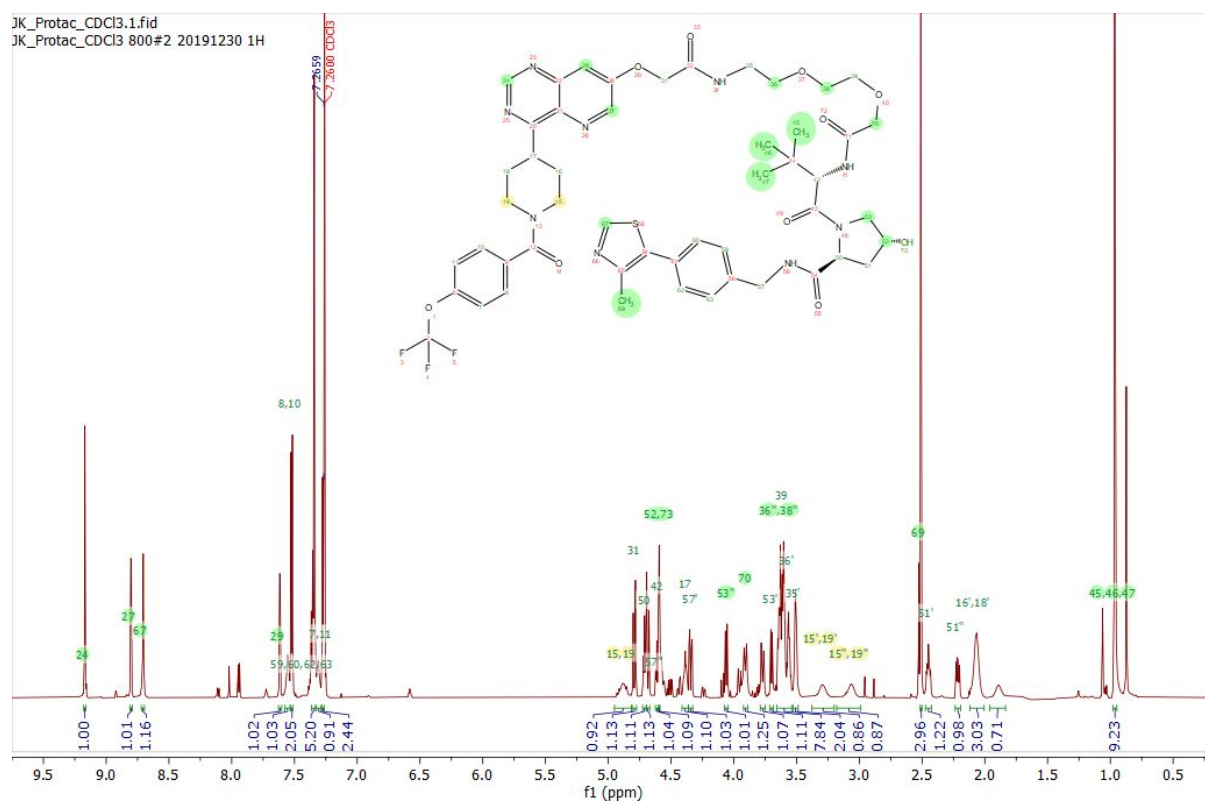

Figure S5. <sup>1</sup>H NMR Spectrum of PROTAC 1 (CDCl<sub>3</sub>)

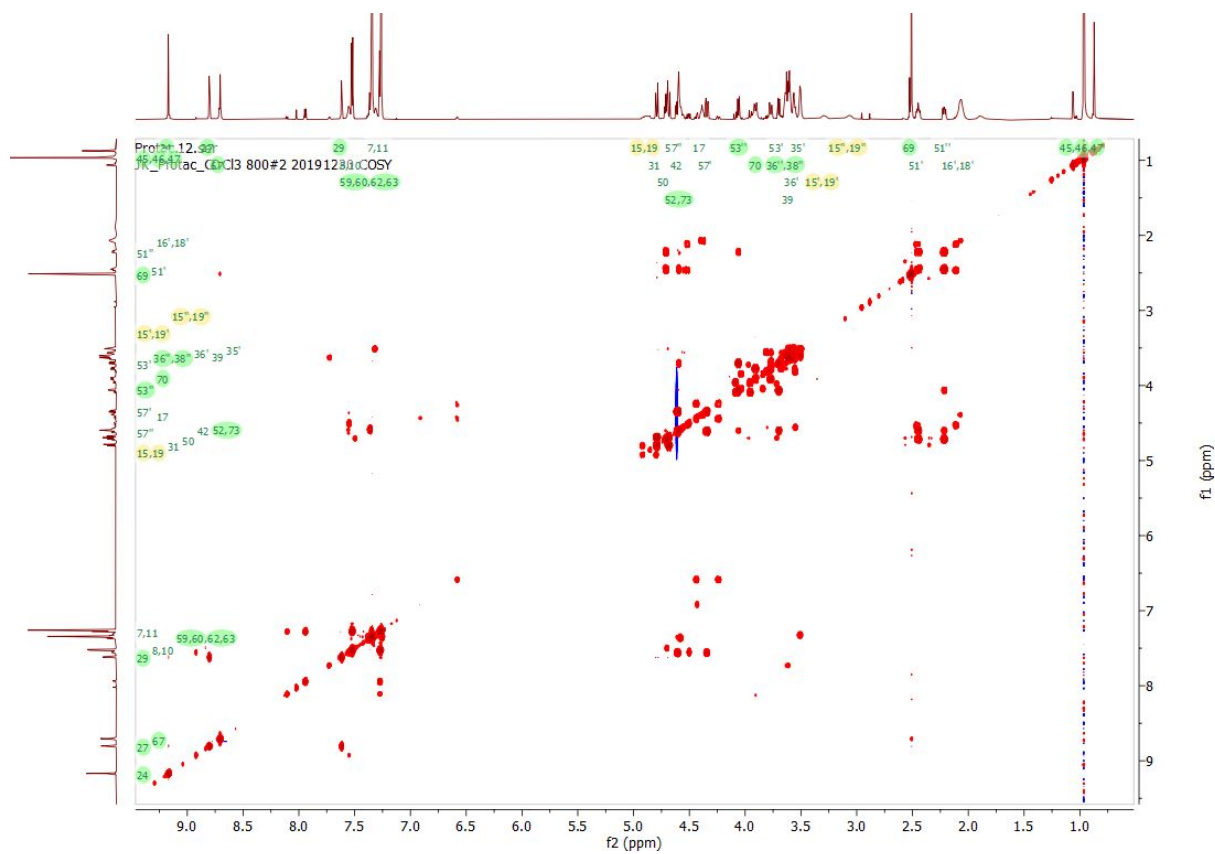

Figure S6. COSY Spectrum of PROTAC 1 (CDCl<sub>3</sub>)

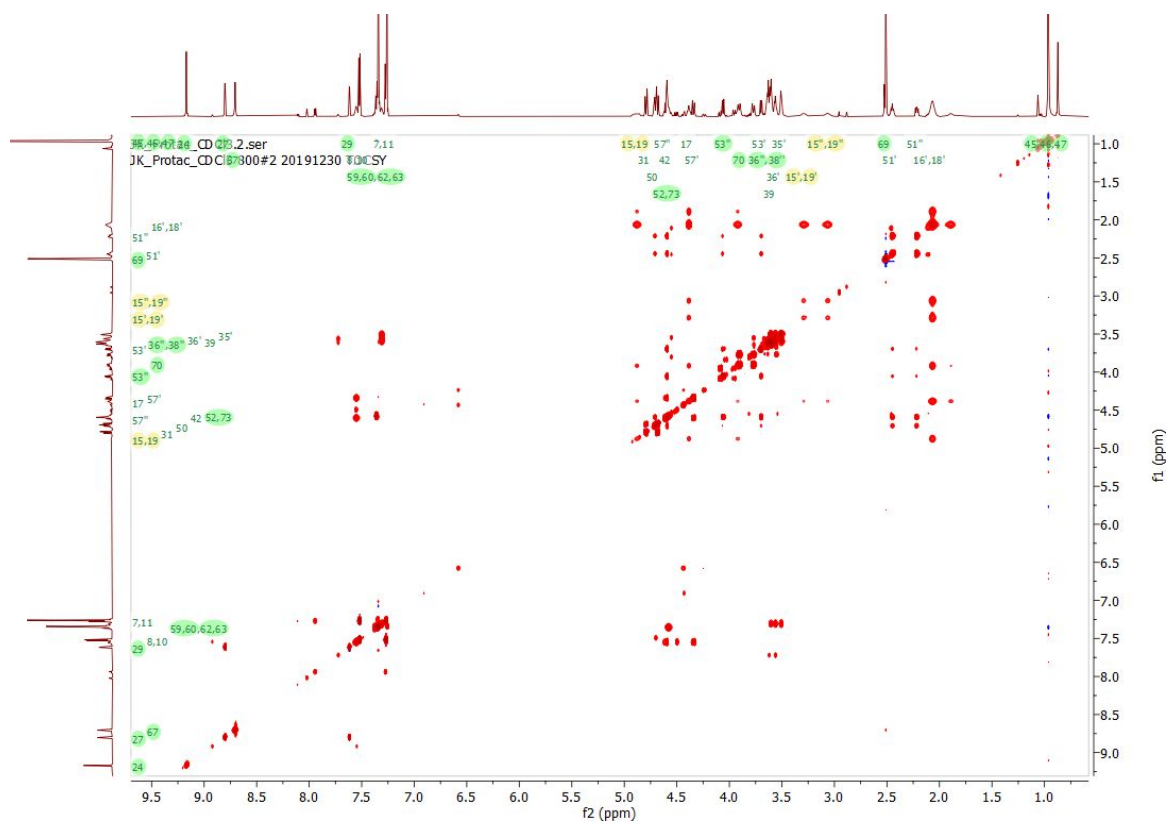

Figure S7. TOCSY Spectrum of PROTAC 1 (CDCl<sub>3</sub>)



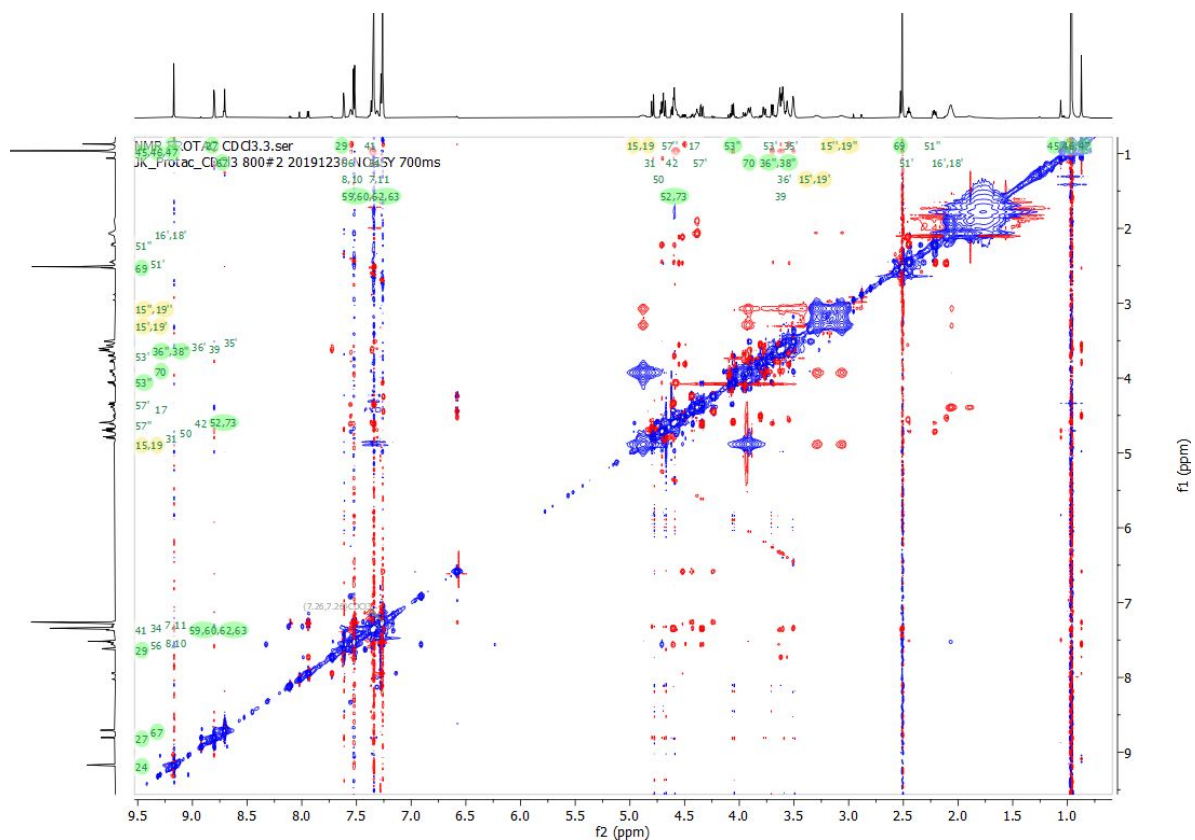

**Figure S8.** NOESY Spectrum of PROTAC 1 (CDCl<sub>3</sub>)

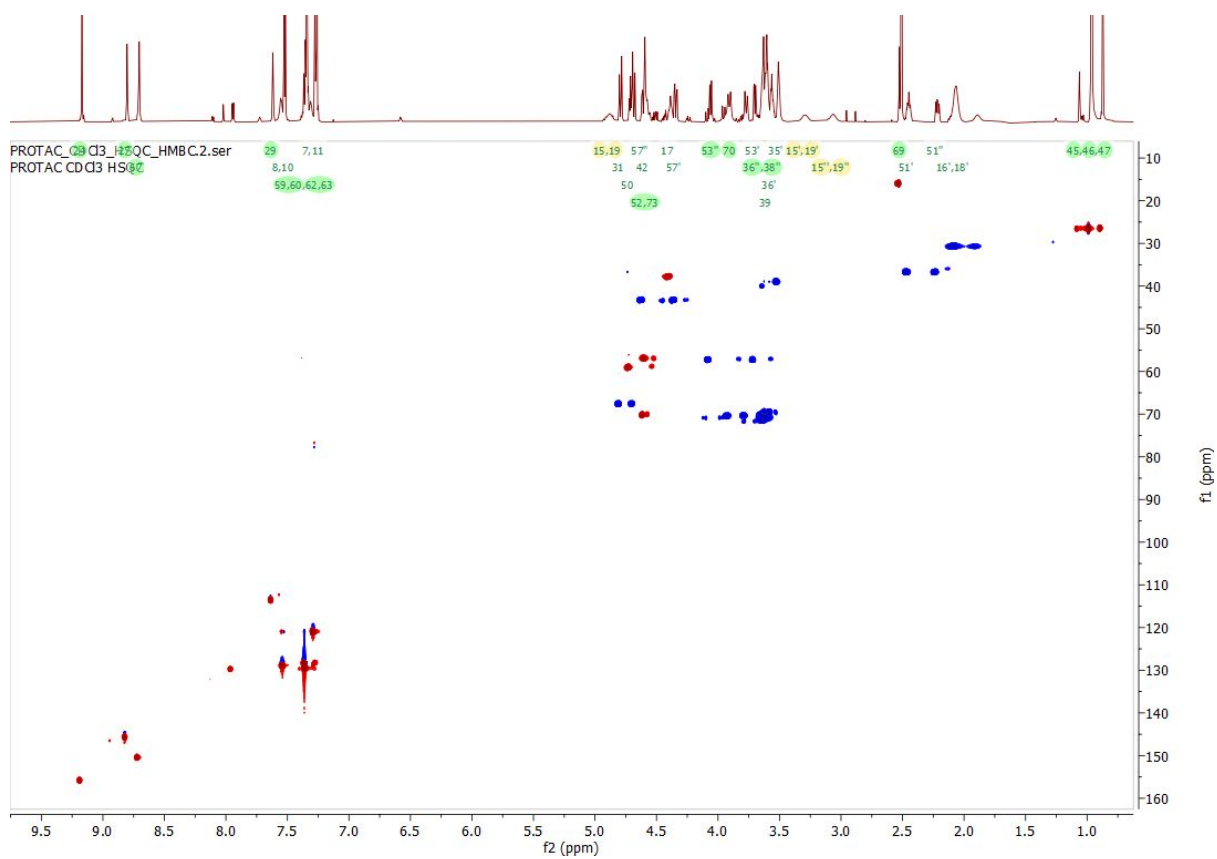

**Figure S9.** HSQC Spectrum of PROTAC 1 (CDCl<sub>3</sub>)

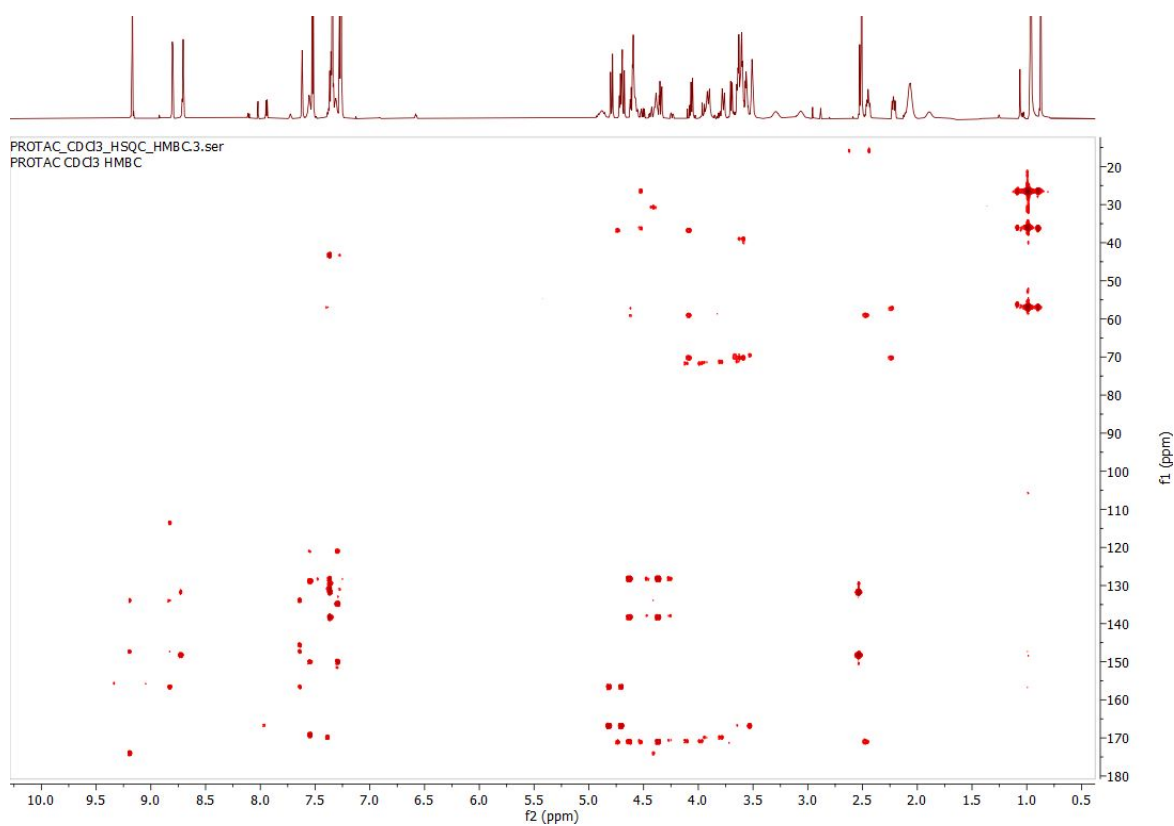

**Figure S10.** HMBC Spectrum of PROTAC 1 ( $\text{CDCl}_3$ )

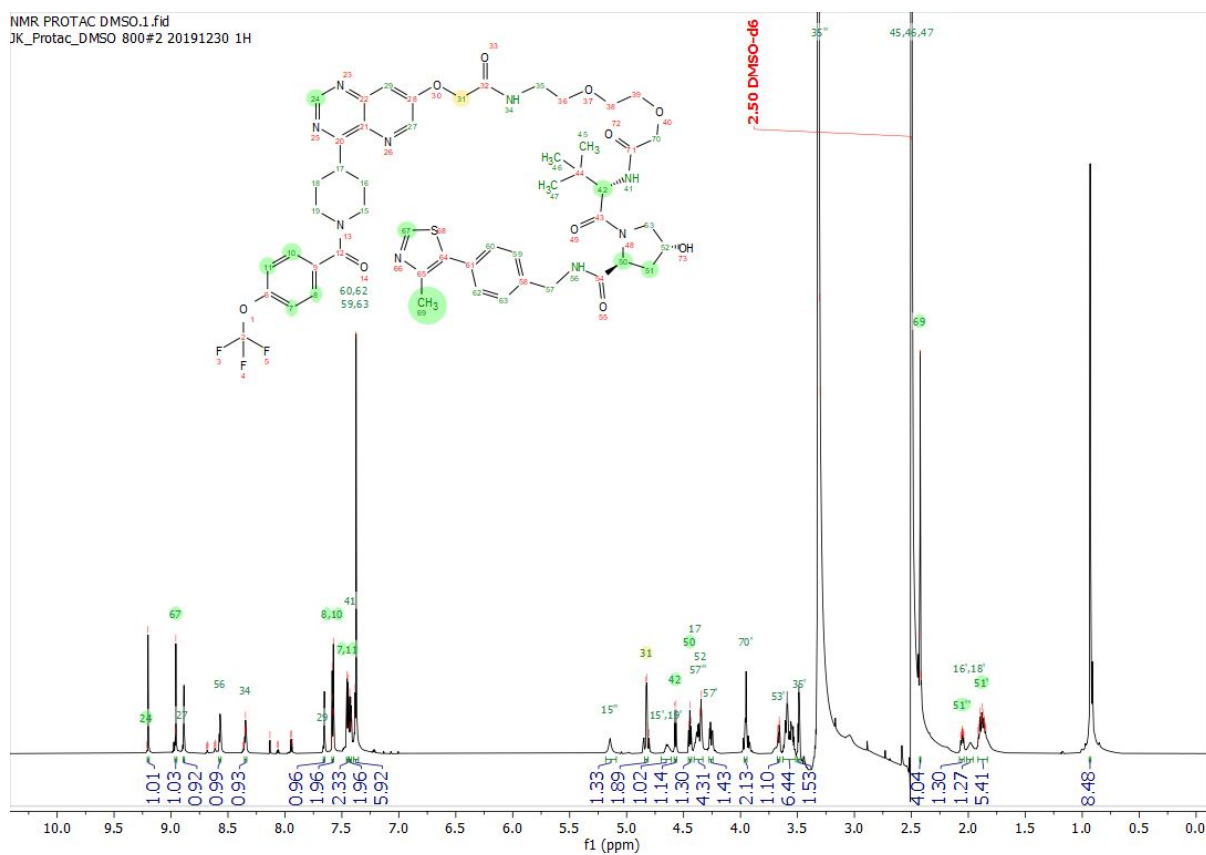

**Figure S11.**  $^1\text{H}$  NMR Spectrum of PROTAC 1 ( $\text{DMSO}-d_6$ )

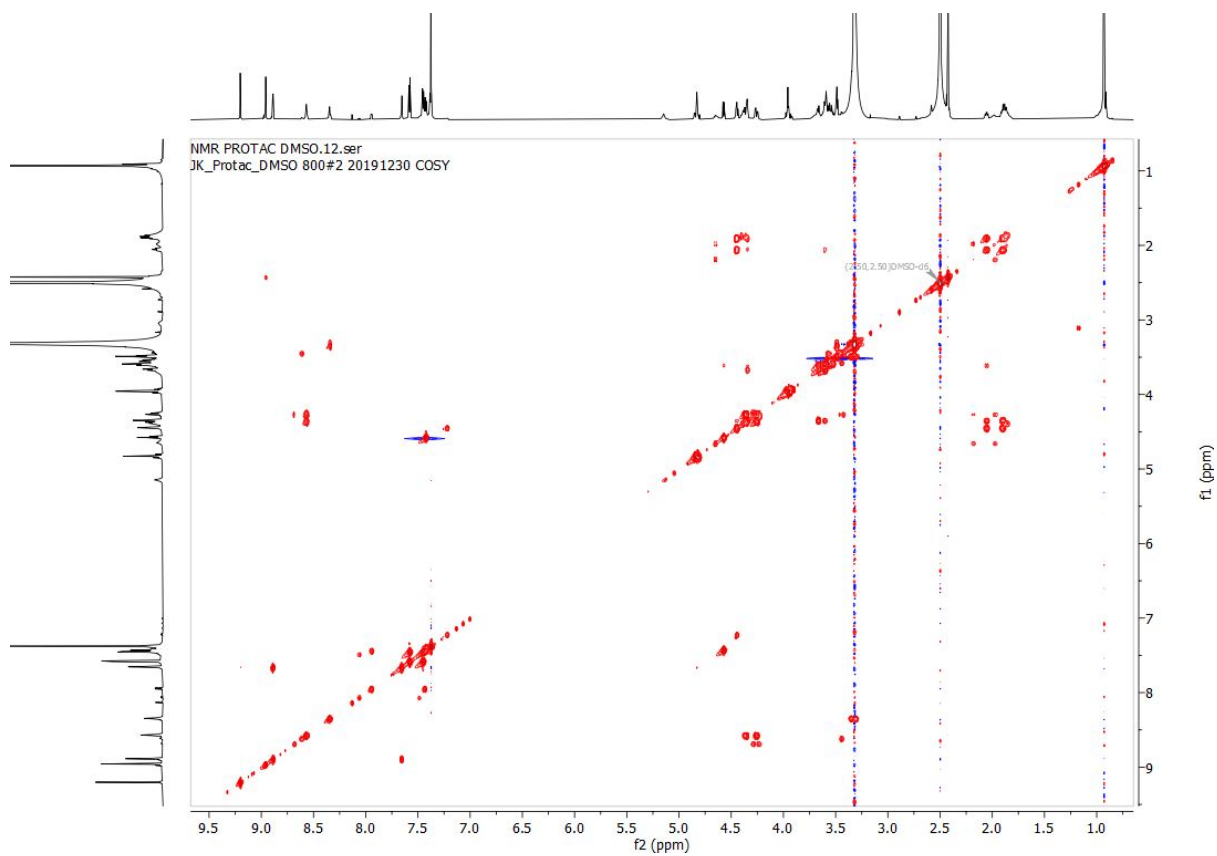

**Figure S12.** COSY Spectrum of PROTAC 1 (DMSO- $d_6$ )

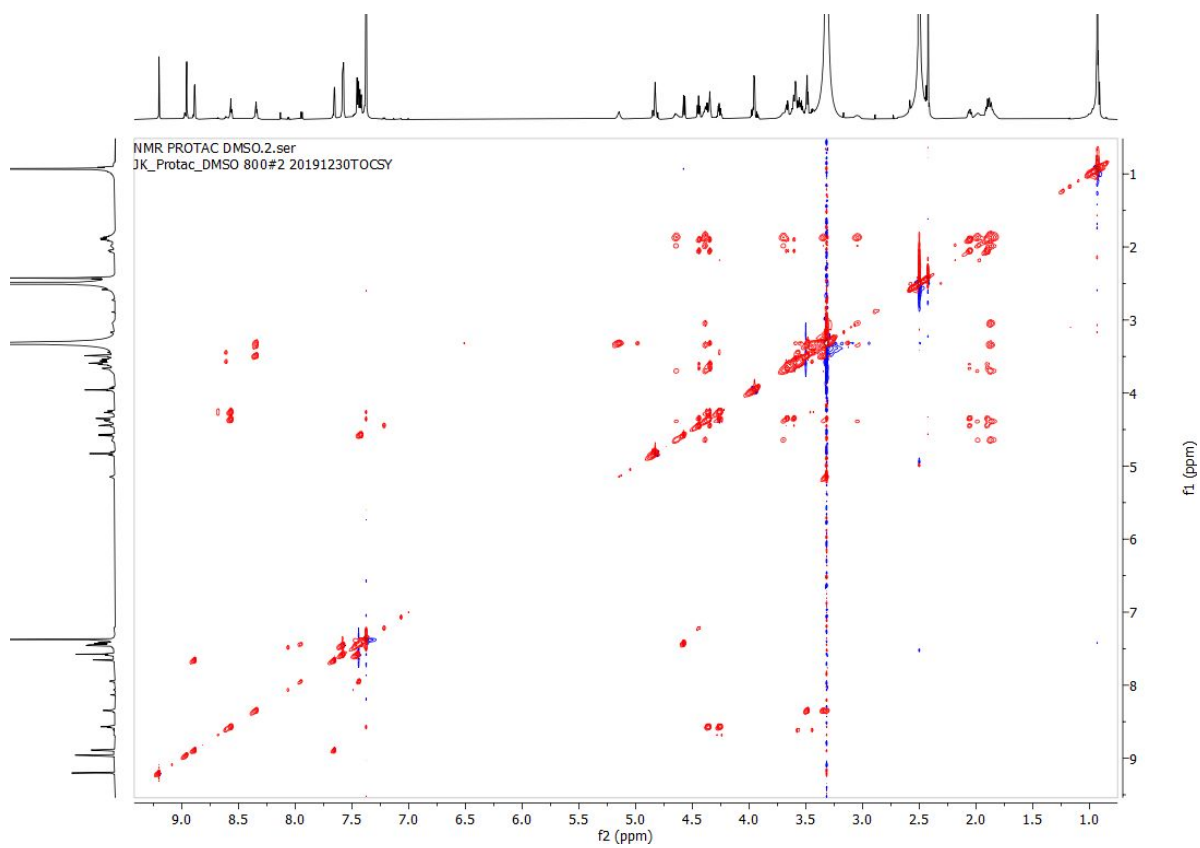

**Figure S13.** TOCSY Spectrum of PROTAC 1 (DMSO- $d_6$ )

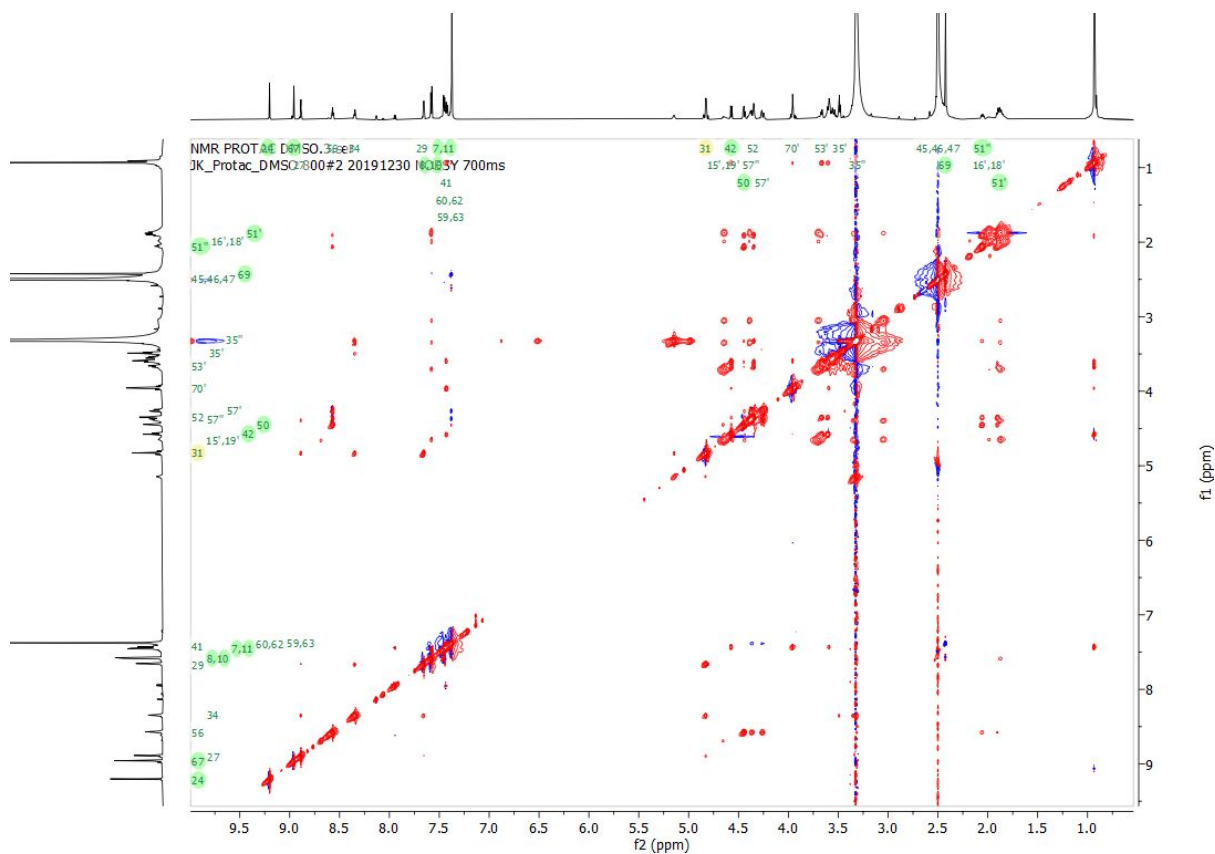

Figure S14. NOESY Spectrum of PROTAC 1 (DMSO-*d*<sub>6</sub>)

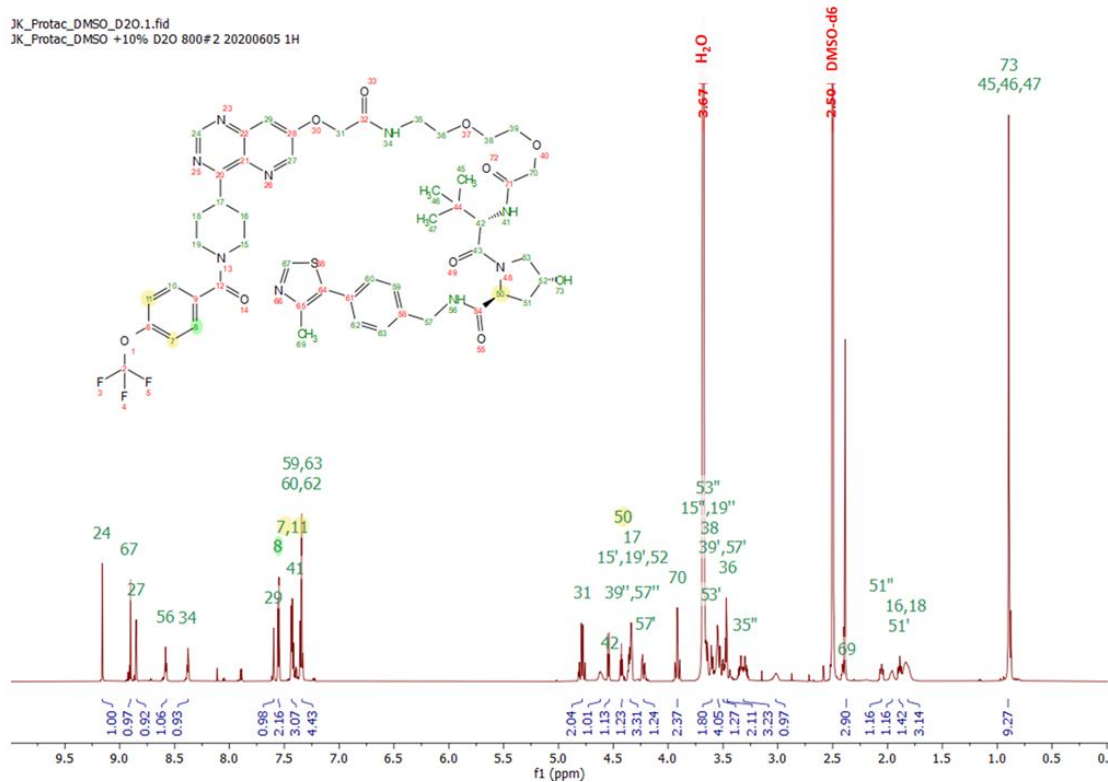

Figure S15. <sup>1</sup>H NMR Spectrum of PROTAC 1 (DMSO-*d*<sub>6</sub>:D<sub>2</sub>O)

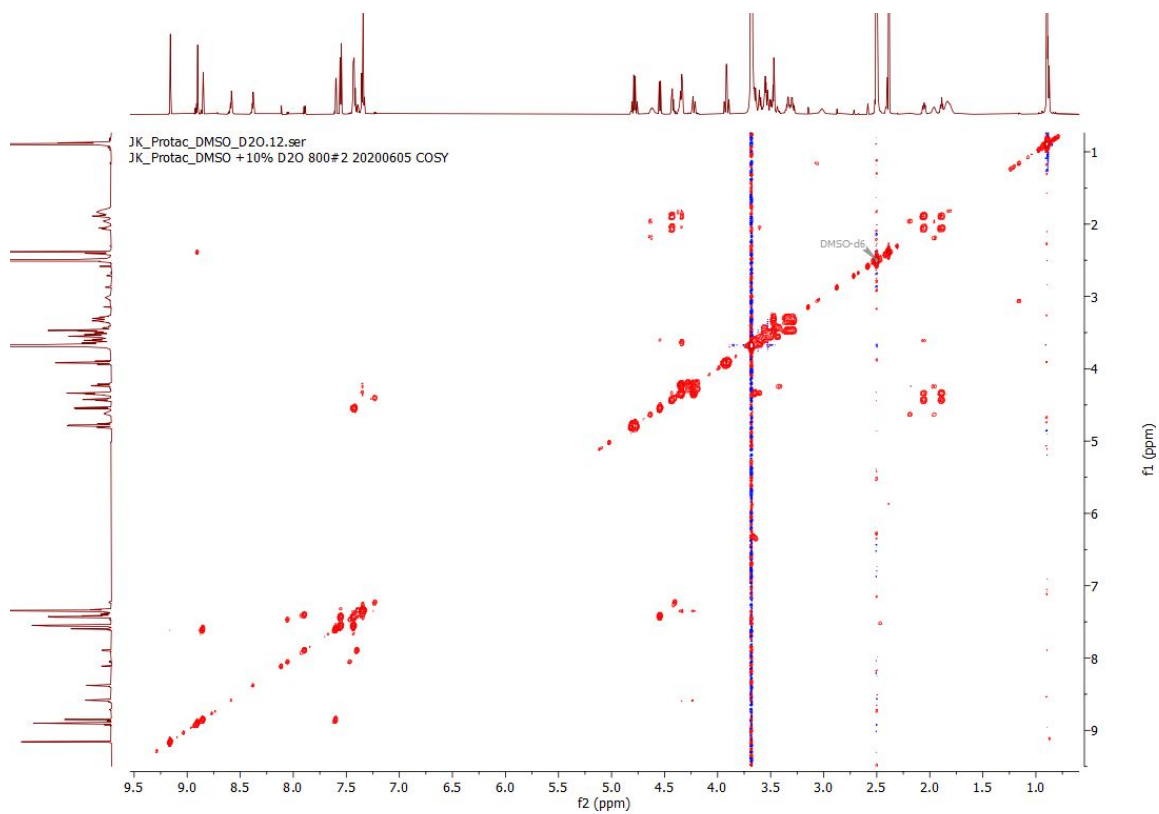

**Figure S16.** COSY Spectrum of PROTAC 1 (DMSO- $d_6$ :D $_2$ O)

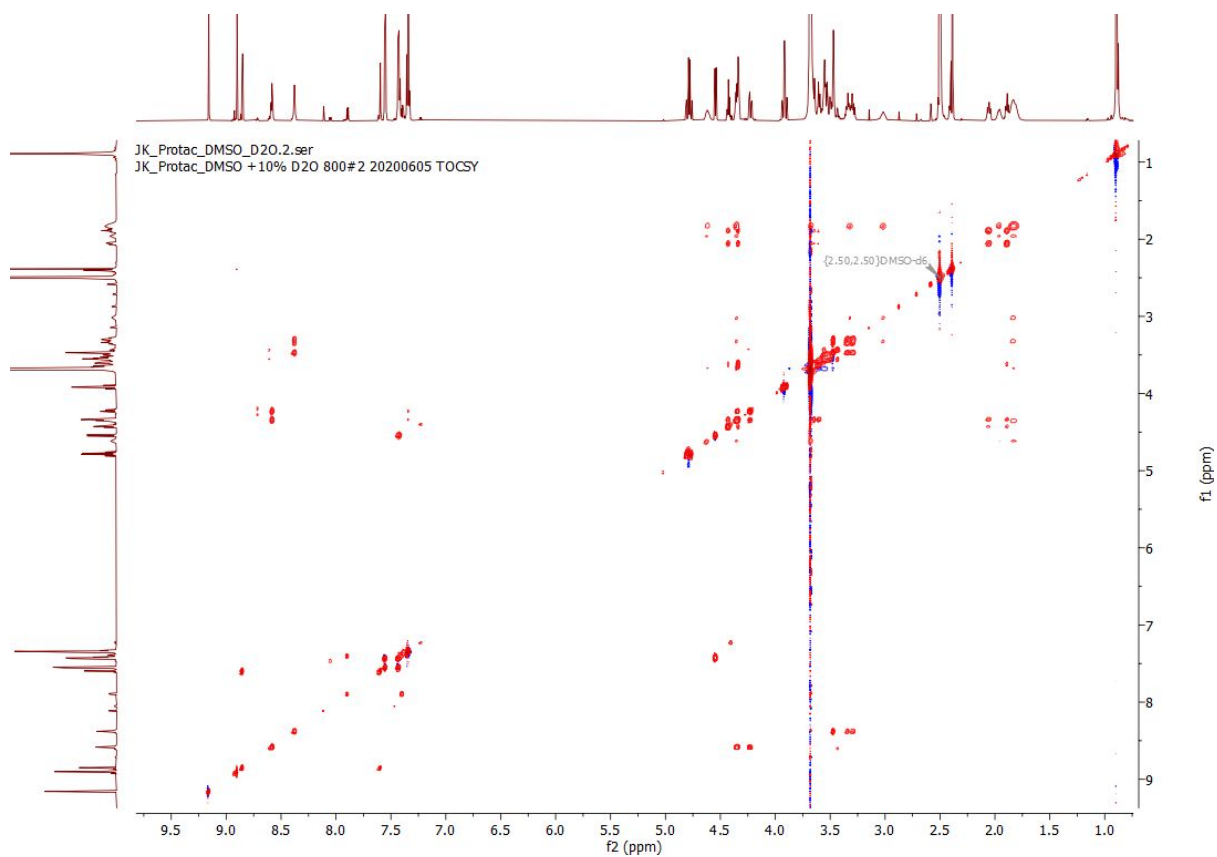

**Figure S17.** TOCSY Spectrum of PROTAC 1 (DMSO- $d_6$ :D $_2$ O)

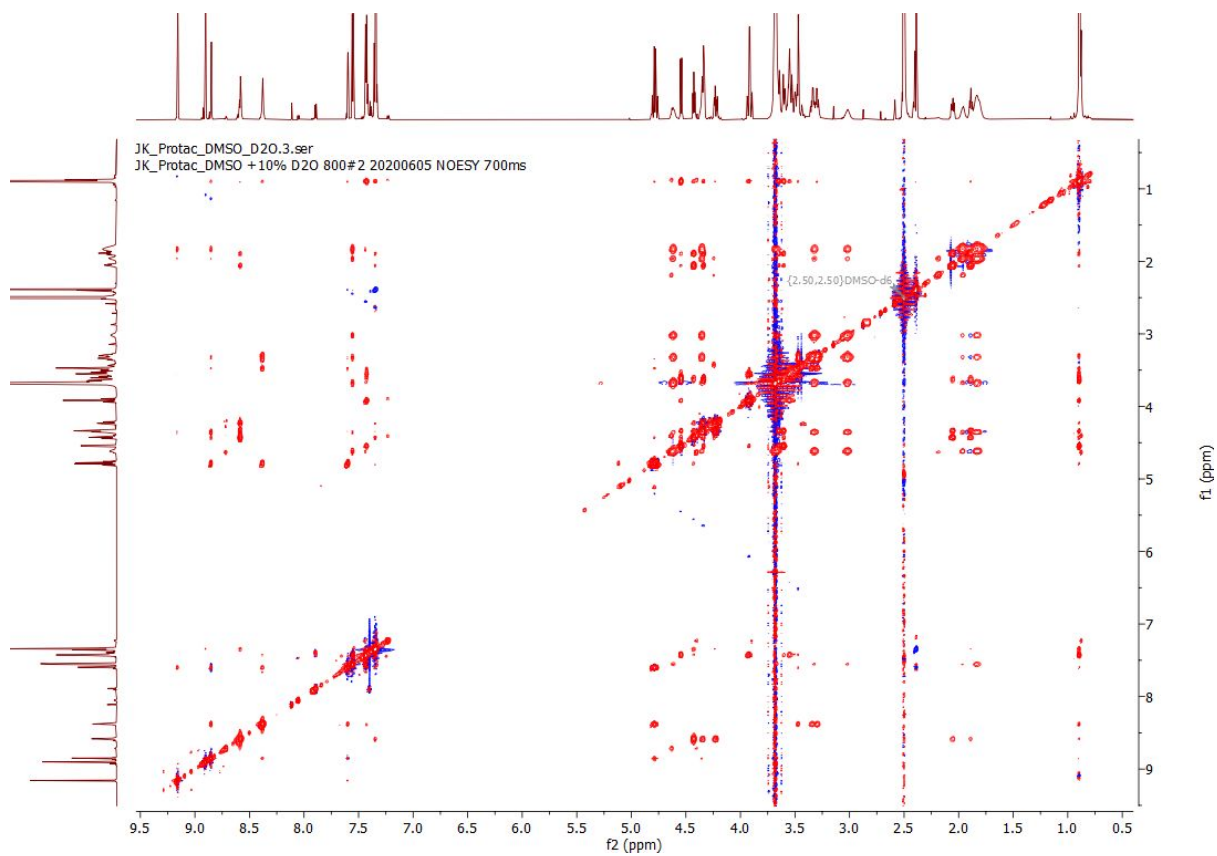

**Figure S18.** NOESY Spectrum of PROTAC **1** (DMSO-*d*<sub>6</sub>:D<sub>2</sub>O)

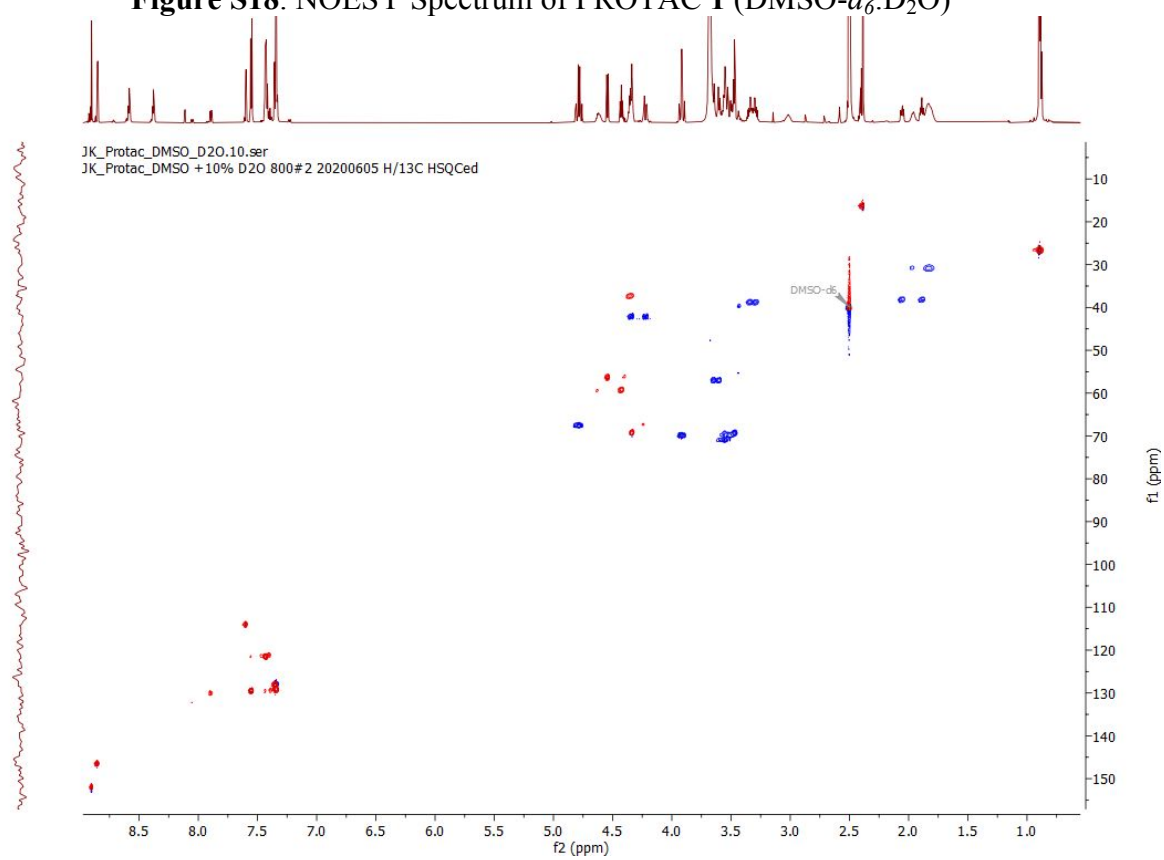

**Figure S19.** HSQC Spectrum of PROTAC **1** (DMSO-*d*<sub>6</sub>:D<sub>2</sub>O)

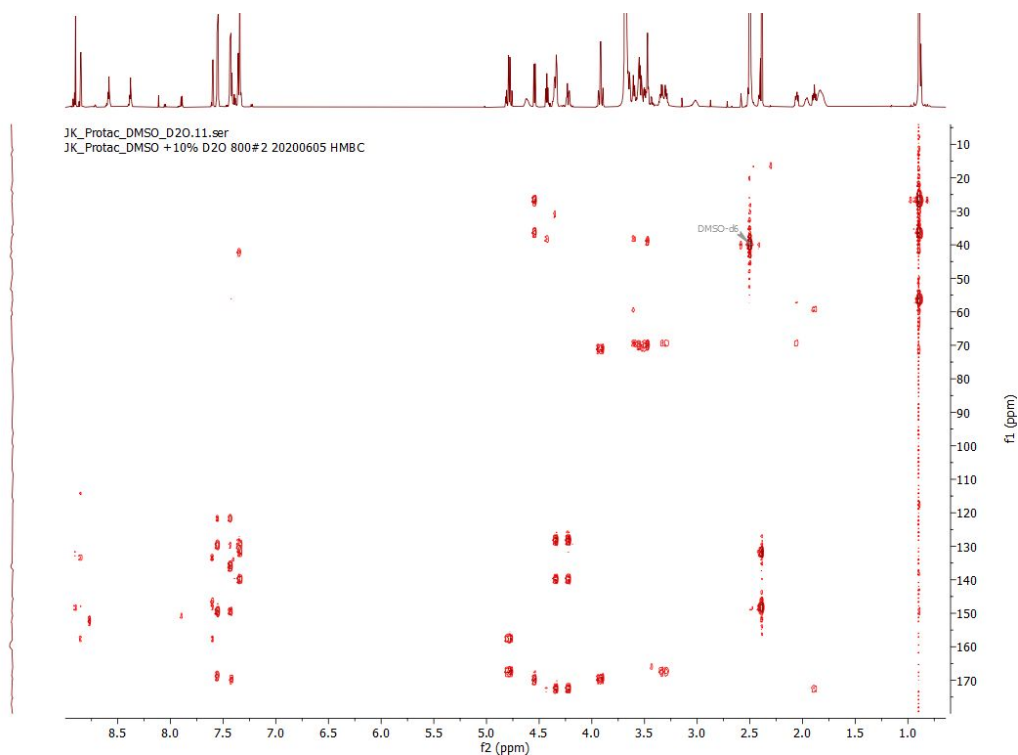

**Figure S20.** HMBC Spectrum of PROTAC 1 (DMSO- $d_6$ :D $_2$ O)

ESD0152630\_13C\_NMR\_400 MHz\_ CDCl3

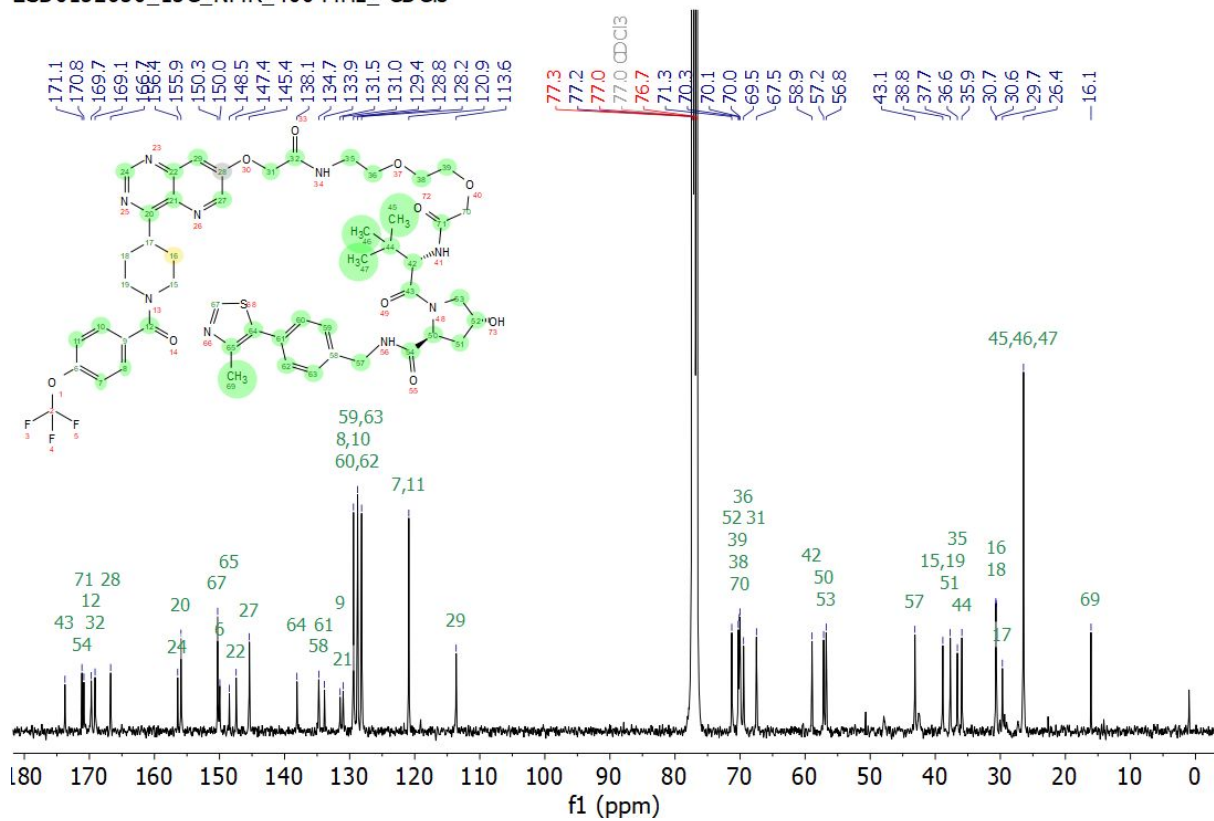

**Figure S21.**  $^{13}\text{C}$  NMR Spectrum of PROTAC 1 (CDCl $_3$ )

## 9. References

- 1) Nguyen, D.; Wortmann, L.; Lemos, C.; Boemer, U.; Suelzle, D.; Holton, S. J.; Lechner, C. The identification and use of ERK5 inhibitors. WO2019/170543 A1, September, 12<sup>th</sup>, 2019. Also see: Nguyen, D.; Lemos, C.; Wortmann, L.; Eis, K.; Holton, S. J.; Boemer, U.; Moosmayer, D.; Eberspaecher, U.; Weiske, J.; Lechner, C.; Prechtel, S.; Suelzle, D.; Siegel, F.; Prinz, F.; Lesche, R.; Nicke, B.; Nowak-Reppel, K.; Himmel, H.; Mumberg, D.; von Nussbaum, F.; Nising, C. F.; Bauser, M.; Haegebarth, A. Discovery and characterization of the potent and highly selective (Piperidin-4-yl)pyrido[3,2-*d*]pyrimidine based *in vitro* probe BAY-885 for the kinase ERK5. *J. Med. Chem.* **2019**, *62*, 928–940.
- 2) Chan, K.-H.; Zengerle, M.; Testa, A.; Ciulli, A. Impact of target warhead and linkage vector on inducing protein degradation: Comparison of Bromodomain and extra-terminal (BET) degraders derived from triazolodiazepine (JQ1) and tetrahydroquinoline (I-BET726) BET inhibitor scaffolds. *J. Med. Chem.* **2019**, *61*, 504–513. Yang, B.; Kettle, J. G.; Haylow, T. G. C.; Rasmusson, T. G.; Nissink, J. W. M.; Fallan, C.; Lamont, G. M. Compounds and their use in treating cancer. US2019194190 A1, June 27<sup>th</sup>, **2019**.
- 3) Cicero, D. O.; Barbato, G.; Bazzo, R., NMR Analysis of Molecular Flexibility in Solution: A New Method for the Study of Complex Distributions of Rapidly Exchanging Conformations. Application to a 13-Residue Peptide with an 8-Residue Loop. *J. Am. Chem. Soc.* **1995**, *117*, 1027-1033.
- 4) Nevins, N.; Cicero, D.; Snyder, J. P., A Test of the Single-Conformation Hypothesis in the Analysis of NMR Data for Small Polar Molecules: A Force Field Comparison. *J. Org. Chem.* **1999**, *64*, 3979-3986.
- 5) Maple, H. J.; Clayden, N.; Baron, A.; Stacey, C.; Felix, R. Developing degraders: principles and perspectives on design and chemical space. *Med. Chem. Comm.*, **2019**, *10*, 1755-1764.
- 6) MOE Molecular Operating Environment, Chemical Computing Group ULC, 1010 Sherbooke St. West, Suite #910, Montreal, QC, Canada, H3A 2R7., **2016**.
- 7) Team, R. RStudio Team. R Studio: Integrated Development for R. RStudio, PBC, Boston, MA **2020**.
- 8) Danelius, E.; Poongavanam, V.; Peintner, S.; Wieske, L. H. E.; Erdelyi, M.; Kihlberg, J. Solution Conformations Explain the Chameleonic Behaviour of Macrocyclic Drugs. *Chem. Eur. J.* **2020**, *26*, 5231-5244.
- 9) Sander, T.; Freyss, J.; von Korff, M.; Rufener, C. DataWarrior: an open-source program for chemistry aware data visualization and analysis. *J. Chem. Inf. Model.* **2015**, *55*, 460-73.
- 10) Maestro Schrödinger Release 2019, Schrödinger, LLC, New York, NY, **2019**.
